# Supplementary material for: Silver-promoted dearomative [3+4] cycloaddition of anthranils with α-isocyanoacetates: access to benzodiazepines
Source: Royal Society of Chemistry journal article supplement (doi:10.1039/d2cc00807f), 2022-01-01
Supplement: d2cc00807f1.pdf [file d2cc00807f1.pdf]

## SUPPORTING INFORMATION

### Silver-promoted dearomative [3 + 4] cycloaddition of anthranils with $\alpha$ -isocyanoacetates: access to benzodiazepines

Rui Shao,<sup>a†</sup> Haixia Zhao,<sup>a†</sup> Shumin Ding,<sup>a</sup> Lianjie Li,<sup>a</sup> Chen Chen,<sup>a</sup> Jian Wang<sup>\*a</sup> and Yongjia Shang<sup>\*a</sup>

Key Laboratory of Functional Molecular Solids, Ministry of Education, Anhui Laboratory of Molecule-Based Materials (State Key Laboratory Cultivation Base), College of Chemistry and Materials Science, Anhui Normal University, Wuhu 241002, P.R. China

### Contents

|                                                                   |    |
|-------------------------------------------------------------------|----|
| I. General Information .....                                      | 2  |
| II. Preparation of Starting Materials .....                       | 2  |
| III. General procedure for the cycloaddition reaction.....        | 3  |
| IV. Optimization of Conditions .....                              | 3  |
| V. Characterization Data .....                                    | 5  |
| VI. Copies of <sup>1</sup> H and <sup>13</sup> C NMR Spectra..... | 16 |
| VII. X-ray Data.....                                              | 55 |
| VIII. References .....                                            | 55 |

## I. General Information

Unless otherwise specified, all reagents and starting materials were purchased from commercial sources and used as received. Solvents were used directly without further purification. The substrates of anthranils<sup>[1-4]</sup> and  $\alpha$ -isocyanoacetates<sup>[5]</sup> were synthesized by reported methods. <sup>1</sup>H NMR (400 MHz), <sup>1</sup>H NMR (500 MHz) and <sup>13</sup>C NMR (100 MHz) were registered on 400 M spectrometers. Chemical shifts were reported in units (ppm) by assigning CDCl<sub>3</sub> resonance in the <sup>1</sup>H spectrum as 7.26 ppm, CDCl<sub>3</sub> resonance in the <sup>13</sup>C spectrum as 77.0 ppm, DMSO – D<sub>6</sub> resonance in the <sup>1</sup>H spectrum as 2.5 ppm, DMSO – D<sub>6</sub> resonance in the <sup>13</sup>C spectrum as 39.52 ppm. All coupling constants (J values) were reported in Hertz (Hz). NMR analysis was carried out at 298 K unless noted otherwise HRMS was obtained on an ESI-LC-MS/MS spectrometer.

## II. Preparation of Starting Materials

General procedure for the synthesis of anthranils<sup>1</sup>

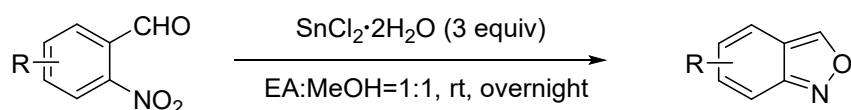

A round bottom flask equipped with a magnetic stirrer bar was charged with the substituted 2-nitroacylbenzene (3.00 mmol) in EtOAc–MeOH (1:1; 20 mL). SnCl<sub>2</sub>·H<sub>2</sub>O (9.00 mmol) was added and the reaction was stirred at room temperature for 24 h. The reaction was quenched by saturated NaHCO<sub>3</sub> (20 ml), and filtered. The aqueous phase was extracted with EtOAc (3×10 mL) and the organic portions combined, washed with H<sub>2</sub>O (20 mL), saturated aqueous NaCl (20 mL), dried over Na<sub>2</sub>SO<sub>4</sub>, filtered and reduced in vacuo. The residue was purified by column chromatography (SiO<sub>2</sub>, PE/EtOAc) to provide the title compound.

General Procedure for the Synthesis of  $\alpha$ -isocyanoacetates<sup>2</sup>

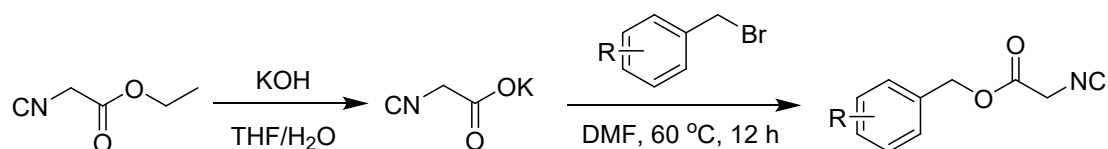

To a solution of the ethyl isocyanoacetate (10 mmol) in THF (20.0 mL) and water (5.0 mL) was added potassium hydroxide (10 mmol), and the resultant mixture was stirred at room temperature for 5 h. The solvent was then removed in vacuum and the resultant salt was used without further purification.

In a 50 mL Schlenk flask were placed potassium 2-isocyanoacetate (10.6 mmol), benzyl bromide (10.9 mmol), and dimethylformamide (DMF, 10 mL), and the resulting mixture was stirred at 60 °C for 8 h. Then, DMF was removed under reduce pressure. To the residue was added water and extracted with ethyl acetate. The combined organic layer was dried over anhydrous Na<sub>2</sub>SO<sub>4</sub>. After concentration in vacuo, the residue was purified by column chromatography on SiO<sub>2</sub> with hexane/AcOEt (4/1) to give

title compound (612 mg, 3.38 mmol).

### III. General procedure for the cycloaddition reaction

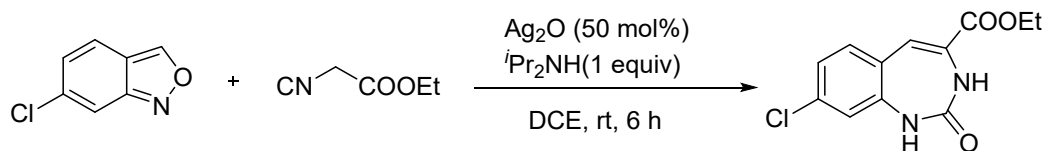

To a mixture of Anthranilide (0.1 mmol),  $\text{Ag}_2\text{O}$  (50 mol%),  $i\text{Pr}_2\text{NH}$  (0.1 mmol) in DCE (1 mL) was added of ethyl isocyanoacetate (0.5 mmol) in DCE (1 mL, analytical grade) via a syringe pump during a period of 4 h under Air at 25 °C, and then stir for another 2 h. The reaction mixture was quenched with water and the aqueous layer was extracted with ethyl acetate. The combined organic layers were dried over anhydrous  $\text{Na}_2\text{SO}_4$  and evaporated under vacuo. The residue was purified by silica gel flash column chromatography to afford the product.

### IV. Optimization of Conditions

Optimization of the reaction conditions<sup>a</sup>

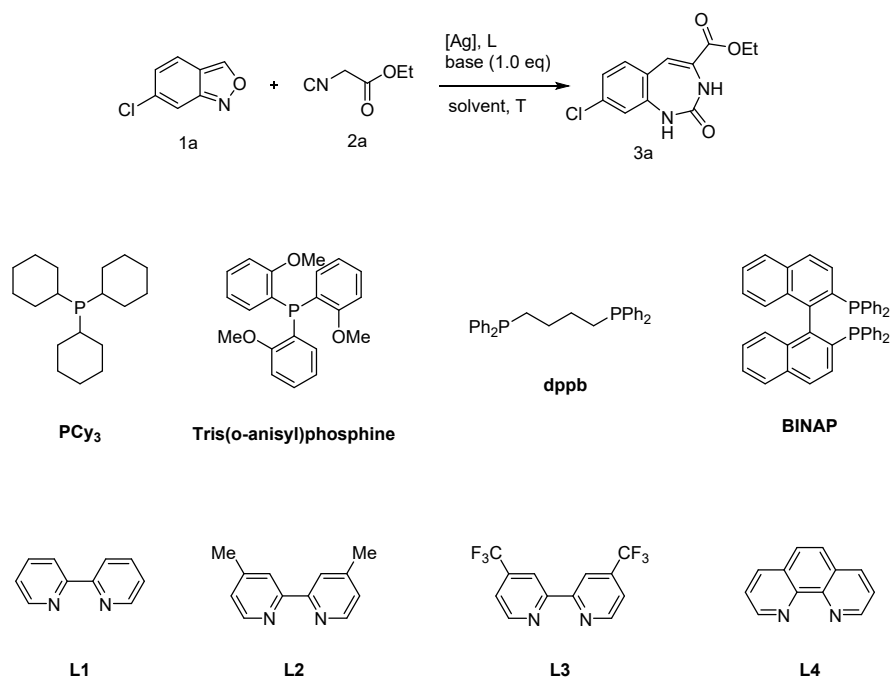

| entry          | $[\text{Ag}]$         | ligand         | base                    | solvent | Yield(%) |
|----------------|-----------------------|----------------|-------------------------|---------|----------|
| 1              | $\text{Ag}_2\text{O}$ | $\text{PPh}_3$ | $i\text{Pr}_2\text{NH}$ | DCE     | 19       |
| 2 <sup>b</sup> | $\text{Ag}_2\text{O}$ | $\text{PPh}_3$ | $i\text{Pr}_2\text{NH}$ | DCE     | 7        |
| 3              | $\text{Ag}_2\text{O}$ | $\text{PCy}_3$ | $i\text{Pr}_2\text{NH}$ | DCE     | 10       |

|                     |                                 |                         |                                            |         |    |
|---------------------|---------------------------------|-------------------------|--------------------------------------------|---------|----|
| 4                   | Ag <sub>2</sub> O               | Tris(o-anisyl)phosphine | <sup>t</sup> Pr <sub>2</sub> NH            | DCE     | 9  |
| 5                   | Ag <sub>2</sub> O               | dppb                    | <sup>t</sup> Pr <sub>2</sub> NH            | DCE     | NR |
| 6                   | Ag <sub>2</sub> O               | BINAP                   | <sup>t</sup> Pr <sub>2</sub> NH            | DCE     | 12 |
| 7                   | Ag <sub>2</sub> O               | L1                      | <sup>t</sup> Pr <sub>2</sub> NH            | DCE     | 57 |
| 8                   | Ag <sub>2</sub> O               | L2                      | <sup>t</sup> Pr <sub>2</sub> NH            | DCE     | 65 |
| 9                   | Ag <sub>2</sub> O               | L3                      | <sup>t</sup> Pr <sub>2</sub> NH            | DCE     | 45 |
| 10                  | Ag <sub>2</sub> O               | L4                      | <sup>t</sup> Pr <sub>2</sub> NH            | DCE     | 38 |
| 11                  | AgF                             | L2                      | <sup>t</sup> Pr <sub>2</sub> NH            | DCE     | 49 |
| 12                  | AgOAc                           | L2                      | <sup>t</sup> Pr <sub>2</sub> NH            | DCE     | 37 |
| 13                  | Ag <sub>3</sub> PO <sub>4</sub> | L2                      | <sup>t</sup> Pr <sub>2</sub> NH            | DCE     | 43 |
| 14                  | Ag <sub>2</sub> CO <sub>3</sub> | L2                      | <sup>t</sup> Pr <sub>2</sub> NH            | DCE     | 56 |
| 15                  | /                               | L2                      | <sup>t</sup> Pr <sub>2</sub> NH            | DCE     | 0  |
| 16                  | Ag <sub>2</sub> O               | L2                      | Bn <sub>2</sub> NH                         | DCE     | 36 |
| 17                  | Ag <sub>2</sub> O               | L2                      | DIPEA                                      | DCE     | 38 |
| 18                  | Ag <sub>2</sub> O               | L2                      | K <sub>2</sub> CO <sub>3</sub>             | DCE     | 21 |
| 19                  | Ag <sub>2</sub> O               | L2                      | NaOAc                                      | DCE     | 27 |
| 20                  | Ag <sub>2</sub> O               | L2                      | Amantadine                                 | DCE     | 50 |
| 21                  | Ag <sub>2</sub> O               | L2                      | <sup>t</sup> Pr <sub>2</sub> NH            | Dioxane | 33 |
| 22                  | Ag <sub>2</sub> O               | L2                      | <sup>t</sup> Pr <sub>2</sub> NH            | THF     | 24 |
| 23                  | Ag <sub>2</sub> O               | L2                      | <sup>t</sup> Pr <sub>2</sub> NH            | Toluene | 44 |
| 24                  | Ag <sub>2</sub> O               | L2                      | <sup>t</sup> Pr <sub>2</sub> NH            | MeCN    | 21 |
| 25                  | Ag <sub>2</sub> O               | L2                      | <sup>t</sup> Pr <sub>2</sub> NH            | Ether   | 30 |
| 26                  | Ag <sub>2</sub> O               | L2                      | <sup>t</sup> Pr <sub>2</sub> NH            | MTBE    | 43 |
| 27                  | Ag <sub>2</sub> O               | L2                      | <sup>t</sup> Pr <sub>2</sub> NH            | PhCl    | 51 |
| 28 <sup>c</sup>     | Ag <sub>2</sub> O               | L2                      | <sup>t</sup> Pr <sub>2</sub> NH            | DCE     | 73 |
| 29 <sup>c</sup>     | Ag <sub>2</sub> O               | /                       | <sup>t</sup> Pr <sub>2</sub> NH            | DCE     | 55 |
| 30 <sup>c,d</sup>   | Ag <sub>2</sub> O               | /                       | <sup>t</sup> Pr <sub>2</sub> NH            | DCE     | 79 |
| 31 <sup>c,d</sup>   | Ag <sub>2</sub> O               | /                       | <sup>t</sup> Pr <sub>2</sub> NH (0.5equiv) | DCE     | 57 |
| 32 <sup>c,d</sup>   | Ag <sub>2</sub> O               | /                       | <sup>t</sup> Pr <sub>2</sub> NH (1.5equiv) | DCE     | 72 |
| 33 <sup>c,d</sup>   | Ag <sub>2</sub> O               | /                       | <sup>t</sup> Pr <sub>2</sub> NH (2.0equiv) | DCE     | 63 |
| 34 <sup>c,d,e</sup> | Ag <sub>2</sub> O               | /                       | <sup>t</sup> Pr <sub>2</sub> NH            | DCE     | 53 |
| 35 <sup>c,d,f</sup> | Ag <sub>2</sub> O               | /                       | <sup>t</sup> Pr <sub>2</sub> NH            | DCE     | 75 |

<sup>a</sup>Reaction conditions: **1a** (0.1 mmol), **2a** (0.3 mmol), [Ag] (15 mol %), L (30 mol %), base (0.1 mmol), solvent (2.0 mL). A solution of **2a** in solvent (1 mL) was added slowly *via* a syringe pump in 4 h, and the reaction mixture was stirred for further 2 h at room temperature under air. Yields of isolated products. <sup>b</sup>PPh<sub>3</sub> (60 mol%). <sup>c</sup>**2a** (0.5 mmol). <sup>d</sup>Ag<sub>2</sub>O (50 mol%) and without ligand. <sup>e</sup>**2a** was added in one portion. <sup>f</sup>Under Ar.

## V. Characterization Data

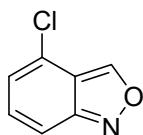

### 4-chlorobenzo[c]isoxazole (1b)

Following the general procedure for the synthesis of anthranils:  $^1\text{H}$  NMR (400 MHz, Chloroform-*d*)  $\delta$  9.21 (d,  $J = 1.1$  Hz, 1H), 8.00 – 7.38 (m, 1H), 7.25 (dd,  $J = 9.0, 6.9$  Hz, 1H), 7.02 (d,  $J = 6.9$  Hz, 1H).  $^{13}\text{C}$  NMR (100 MHz, Chloroform-*d*)  $\delta$  156.58, 154.87, 131.16, 125.28, 123.29, 119.41, 113.79. HRMS (ESI) Calc. for  $\text{C}_7\text{H}_5\text{ClNO}^+$   $[\text{M}+\text{H}]^+$ : 154.0054; found: 154.0055.

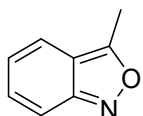

### 3-methylbenzo[c]isoxazole (1ae)

Following the general procedure for the synthesis of anthranils:  $^1\text{H}$  NMR (400 MHz, Chloroform-*d*)  $\delta$  7.49 (dd,  $J = 9.1, 2.8$  Hz, 1H), 7.42 (ddd,  $J = 8.8, 2.8, 1.4$  Hz, 1H), 7.32 – 7.19 (m, 1H), 7.00 – 6.84 (m, 1H), 2.76 (d,  $J = 1.5$  Hz, 3H).  $^{13}\text{C}$  NMR (100 MHz, Chloroform-*d*)  $\delta$  165.74, 157.04, 130.84, 122.77, 119.90, 115.62, 114.79, 11.96. HRMS (ESI) Calc. for  $\text{C}_8\text{H}_8\text{NO}^+$   $[\text{M}+\text{H}]^+$ : 134.0600; found: 134.0592.

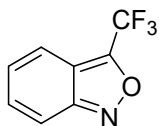

### 3-(trifluoromethyl)benzo[c]isoxazole (1af)

Following the general procedure for the synthesis of anthranils:  $^1\text{H}$  NMR (400 MHz, Chloroform-*d*)  $\delta$  7.70 (dd,  $J = 9.3, 1.1$  Hz, 1H), 7.66 – 7.59 (m, 1H), 7.41 (dd,  $J = 9.2, 6.4$  Hz, 1H), 7.23 (dd,  $J = 8.9, 6.4$  Hz, 1H).  $^{13}\text{C}$  NMR (100 MHz, Chloroform-*d*)  $\delta$  156.94, 151.71 (q,  $J = 42.8$  Hz), 131.49, 127.53, 118.87 (q,  $J = 268.1$  Hz), 117.99, 116.79, 115.60.  $^{19}\text{F}$  NMR (377 MHz,  $\text{CDCl}_3$ )  $\delta$  -61.98. HRMS (ESI) Calc. for  $\text{C}_8\text{H}_5\text{F}_3\text{NO}^+$   $[\text{M}+\text{H}]^+$ : 188.0318; found: 188.0324.

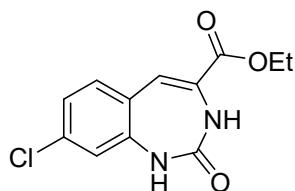

### 8-chloro-2-oxo-2,3-dihydro-1H-benzo[d][1,3]diazepin-4-yl propionate (3a)

21.0 mg, 79% yield, yellow solid, MP = 199 – 200 °C,  $^1\text{H}$  NMR (400 MHz, DMSO-*d*<sub>6</sub>)  $\delta$  9.03 (d,  $J = 2.2$  Hz, 1H), 7.54 (t,  $J = 2.1$  Hz, 1H), 7.22 (d,  $J = 8.3$  Hz, 1H), 7.05 (dd,  $J = 8.3, 2.1$  Hz, 1H), 6.99 (d,  $J = 2.1$  Hz, 1H), 6.85 (d,  $J = 1.8$  Hz, 1H), 4.25 (q,  $J = 7.1$  Hz, 2H), 1.29 (t,  $J = 7.1$  Hz, 3H).  $^{13}\text{C}$  NMR (100 MHz, DMSO)  $\delta$  162.7, 160.6, 140.3, 134.4, 132.4, 127.4, 123.5, 123.2, 119.6, 118.4, 61.9, 13.9. HRMS (ESI) Calc. for  $\text{C}_{12}\text{H}_{12}\text{ClN}_2\text{O}_3^+$   $[\text{M}+\text{H}]^+$ : 267.0531; found: 267.0541.

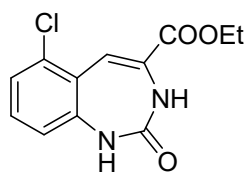

**ethyl 6-chloro-2-oxo-2,3-dihydro-1H-benzo[d][1,3]diazepine-4-carboxylate (3b)**

12.5 mg, 47% yield, yellow solid, MP = 186 – 187 °C, <sup>1</sup>H NMR (400 MHz, DMSO-*d*<sub>6</sub>) δ 9.11 (d, *J* = 2.3 Hz, 1H), 7.85 (t, *J* = 2.0 Hz, 1H), 7.28 (t, *J* = 8.0 Hz, 1H), 7.18 (dd, *J* = 8.0, 1.1 Hz, 1H), 7.12 (d, *J* = 1.7 Hz, 1H), 6.96 (dt, *J* = 8.1, 0.9 Hz, 1H), 4.27 (q, *J* = 7.1 Hz, 2H), 1.29 (t, *J* = 7.1 Hz, 3H). <sup>13</sup>C NMR (100 MHz, DMSO) δ 162.66, 141.42, 132.78, 131.47, 129.51, 124.42, 122.95, 119.86, 116.41, 62.16, 14.03. HRMS (ESI) Calc. for C<sub>12</sub>H<sub>12</sub>ClN<sub>2</sub>O<sub>3</sub><sup>+</sup> [M+H]<sup>+</sup>: 267.0531; found: 267.0523.

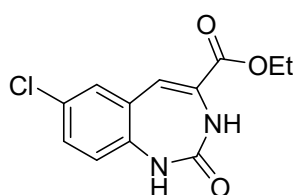

**ethyl 7-chloro-2-oxo-2,3-dihydro-1H-benzo[d][1,3]diazepine-4-carboxylate (3c)**

13.5 mg, 51% yield, yellow solid, MP = 172 – 173 °C, <sup>1</sup>H NMR (400 MHz, DMSO-*d*<sub>6</sub>) δ 9.04 (d, *J* = 3.0 Hz, 1H), 7.51 (s, 1H), 7.40 – 7.23 (m, 2H), 6.94 (t, *J* = 6.4 Hz, 1H), 6.87 (d, *J* = 3.4 Hz, 1H), 4.44 – 4.08 (m, 2H), 1.41 – 1.17 (m, 3H). <sup>13</sup>C NMR (100 MHz, DMSO) δ 162.7, 161.2, 138.0, 130.0, 129.9, 128.4, 127.4, 126.7, 122.0, 118.1, 62.1, 14.0. HRMS (ESI) Calc. for C<sub>12</sub>H<sub>12</sub>ClN<sub>2</sub>O<sub>3</sub><sup>+</sup> [M+H]<sup>+</sup>: 267.0531; found: 267.0530.

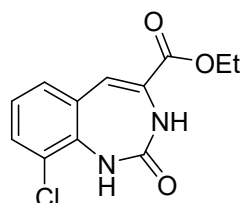

**ethyl 9-chloro-2-oxo-2,3-dihydro-1H-benzo[d][1,3]diazepine-4-carboxylate (3d)**

9.8 mg, 37% yield, yellow solid, MP = 145 – 146 °C, <sup>1</sup>H NMR (500 MHz, DMSO-*d*<sub>6</sub>) δ 7.98 (d, *J* = 2.5 Hz, 1H), 7.90 (t, *J* = 2.1 Hz, 1H), 7.48 (dt, *J* = 8.0, 1.1 Hz, 1H), 7.26 (dd, *J* = 7.7, 1.7 Hz, 1H), 7.15 – 7.08 (m, 1H), 7.05 (d, *J* = 1.8 Hz, 1H), 4.27 (q, *J* = 7.1 Hz, 2H), 1.30 (t, *J* = 7.1 Hz, 3H). <sup>13</sup>C NMR (100 MHz, DMSO) δ 162.7, 161.9, 134.4, 130.5, 129.4, 129.2, 128.4, 125.2, 124.3, 119.5, 62.1, 14.0. HRMS (ESI) Calc. for C<sub>12</sub>H<sub>12</sub>ClN<sub>2</sub>O<sub>3</sub><sup>+</sup> [M+H]<sup>+</sup>: 267.0531; found: 267.0538.

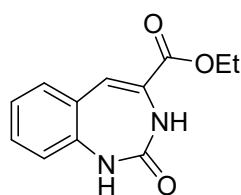

**2-oxo-2,3-dihydro-1H-benzo[d][1,3]diazepin-4-yl propionate (3e)**

12.1 mg, 52% yield, yellow solid· MP = 150 – 151 °C, <sup>1</sup>H NMR (400 MHz, Chloroform-*d*) δ 7.24 – 7.16 (m, 1H), 7.08 – 6.96 (m, 2H), 6.89 (s, 1H), 6.84 (d, *J* = 1.8 Hz, 1H), 6.69 (d, *J* = 8.0 Hz, 1H), 4.33 (q, *J* = 7.1 Hz, 2H), 1.37 (t, *J* = 7.1 Hz, 3H). <sup>13</sup>C NMR (100 MHz, CDCl<sub>3</sub>) δ 162.9, 161.3, 138.0, 131.1, 130.8, 126.7, 124.4, 124.1, 120.0, 119.2, 62.4, 14.2.

HRMS (ESI) Calc. for C<sub>12</sub>H<sub>13</sub>N<sub>2</sub>O<sub>3</sub><sup>+</sup> [M+H]<sup>+</sup>: 233.0921; found: 233.0930.

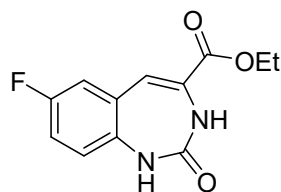

**ethyl 7-fluoro-2-oxo-2,3-dihydro-1H-benzo[d][1,3]diazepine-4-carboxylate (3f)**

13.4 mg, 54% yield, yellow solid· MP = 161 – 162 °C, <sup>1</sup>H NMR (500 MHz, DMSO-*d*<sub>6</sub>) δ 8.94 (d, *J* = 2.3 Hz, 1H), 7.46 (d, *J* = 2.4 Hz, 1H), 7.22 – 7.03 (m, 2H), 6.94 (d, *J* = 5.1 Hz, 1H), 6.87 (d, *J* = 1.8 Hz, 1H), 4.25 (q, *J* = 7.1 Hz, 2H), 1.28 (t, *J* = 7.1 Hz, 3H). <sup>13</sup>C NMR (100 MHz, DMSO-*d*<sub>6</sub>) δ 162.8, 161.8, 159.4, 135.5, 128.5, 126.8 (d, *J* = 8.1 Hz), 122.1 (d, *J* = 8.6 Hz), 118.4, 117.0 (d, *J* = 22.8 Hz), 116.4 (d, *J* = 23.5 Hz), 62.1, 14.0. <sup>19</sup>F NMR (376 MHz, DMSO-*d*<sub>6</sub>) δ -120.8.

HRMS (ESI) Calc. for C<sub>12</sub>H<sub>12</sub>FN<sub>2</sub>O<sub>3</sub><sup>+</sup> [M+H]<sup>+</sup>: 251.0826; found: 251.0822.

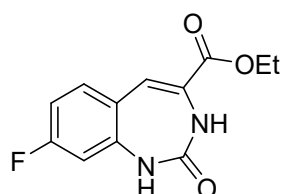

**8-fluoro-2-oxo-2,3-dihydro-1H-benzo[d][1,3]diazepin-4-yl propionate (3g)**

14.9 mg, 60% yield, yellow solid· MP = 156 – 157 °C, <sup>1</sup>H NMR (400 MHz, Chloroform-*d*) δ 7.77 (s, 1H), 6.97 (dd, *J* = 8.6, 6.2 Hz, 1H), 6.92 (s, 1H), 6.77 (d, *J* = 1.9 Hz, 1H), 6.72 – 6.63 (m, 1H), 6.50 (dd, *J* = 9.7, 2.5 Hz, 1H), 4.32 (q, *J* = 7.1 Hz, 2H), 1.37 (t, *J* = 7.1 Hz, 3H). <sup>13</sup>C NMR (100 MHz, Chloroform-*d*) δ 165.3, 162.8, 160.7, 140.0 (d, *J* = 10.3 Hz), 132.8 (d, *J* = 9.9 Hz), 125.8, 120.5 (d, *J* = 3.2 Hz), 118.5, 110.9 (d, *J* = 21.7 Hz), 107.4 (d, *J* = 25.4 Hz), 62.5, 14.18. <sup>19</sup>F NMR (376 MHz, Chloroform-*d*) δ -109.2.

HRMS (ESI) Calc. for C<sub>12</sub>H<sub>12</sub>FN<sub>2</sub>O<sub>3</sub><sup>+</sup> [M+H]<sup>+</sup>: 251.0826; found: 251.0823.

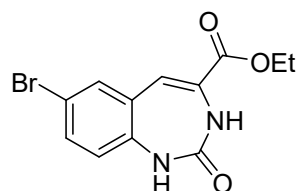

**7-bromo-2-oxo-2,3-dihydro-1H-benzo[d][1,3]diazepin-4-yl propionate (3h)**

17.6 mg, 57% yield, yellow solid· MP = 189 – 190 °C, <sup>1</sup>H NMR (400 MHz, Chloroform-*d*) δ 7.29 (dd, *J* = 8.5, 2.3 Hz, 1H), 7.17 (d, *J* = 2.3 Hz, 1H), 6.92 (s, 2H), 6.74 (d, *J* = 1.8 Hz, 1H), 6.57 (d, *J* = 8.5 Hz, 1H), 4.33 (q, *J* = 7.1 Hz, 2H), 1.37 (t, *J* = 7.1 Hz, 3H). <sup>13</sup>C NMR (100 MHz, CDCl<sub>3</sub>) δ 162.6, 160.5, 136.8, 133.3, 133.3, 127.6, 126.5, 121.5, 117.4, 116.8, 62.7, 14.1.

HRMS (ESI) Calc. for C<sub>12</sub>H<sub>12</sub>BrN<sub>2</sub>O<sub>3</sub><sup>+</sup> [M+H]<sup>+</sup>: 311.0026; found: 311.0027.

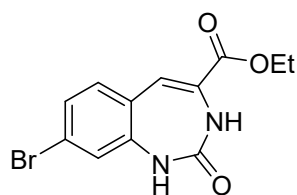

**ethyl 8-bromo-2-oxo-2,3-dihydro-1H-benzo[d][1,3]diazepine-4-carboxylate (3i)**

21.3 mg, 69% yield, yellow solid. MP = 185 – 186 °C, <sup>1</sup>H NMR (400 MHz, Chloroform-*d*) δ 7.12 (d, *J* = 1.9 Hz, 1H), 7.10 (d, *J* = 2.0 Hz, 1H), 6.94 (s, 1H), 6.90 – 6.85 (m, 2H), 6.76 (d, *J* = 1.8 Hz, 1H), 4.33 (q, *J* = 7.2 Hz, 2H), 1.37 (t, *J* = 7.1 Hz, 3H). <sup>13</sup>C NMR (100 MHz, CDCl<sub>3</sub>) δ 162.7, 160.4, 138.9, 132.2, 127.2, 126.8, 124.2, 123.4, 122.8, 118.1, 62.6, 14.1.

HRMS (ESI) Calc. for C<sub>12</sub>H<sub>12</sub>BrN<sub>2</sub>O<sub>3</sub><sup>+</sup> [M+H]<sup>+</sup>: 311.0026; found: 311.0029.

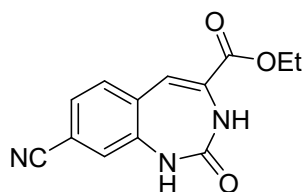

**ethyl 8-cyano-2-oxo-2,3-dihydro-1H-benzo[d][1,3]diazepine-4-carboxylate (3j)**

19.5 mg, 76% yield, yellow solid. MP = 193 – 194 °C, <sup>1</sup>H NMR (400 MHz, DMSO-*d*<sub>6</sub>) δ 9.19 (s, 1H), 7.76 (s, 1H), 7.44-7.38 (m 2H), 7.26 (d, *J* = 2.7 Hz, 1H), 6.87 (d, *J* = 2.9 Hz, 1H), 4.27 (td, *J* = 7.2, 2.5 Hz, 2H), 1.30 (qd, *J* = 7.0, 6.3, 2.9 Hz, 3H). <sup>13</sup>C NMR (100 MHz, DMSO) δ 162.5, 160.5, 139.5, 131.8, 129.8, 129.6, 126.9, 123.1, 118.3, 117.4, 112.1, 62.3, 14.0.

HRMS (ESI) Calc. for C<sub>13</sub>H<sub>12</sub>N<sub>3</sub>O<sub>3</sub><sup>+</sup> [M+H]<sup>+</sup>: 258.0873; found: 258.0872.

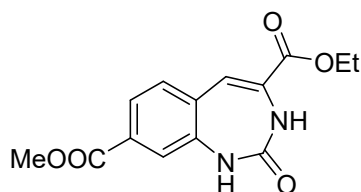

**4-ethyl 8-methyl 2-oxo-2,3-dihydro-1H-benzo[d][1,3]diazepine-4,8-dicarboxylate (3k)**

21.4 mg, 74% yield, yellow solid. MP = 178 – 179 °C, <sup>1</sup>H NMR (400 MHz, DMSO-*d*<sub>6</sub>) δ 9.14 (d, *J* = 2.2 Hz, 1H), 7.61 (t, *J* = 2.0 Hz, 1H), 7.58 – 7.50 (m, 2H), 7.31 (d, *J* = 8.0 Hz, 1H), 6.88 (d, *J* = 1.8 Hz, 1H), 4.27 (q, *J* = 7.1 Hz, 2H), 1.30 (t, *J* = 7.1 Hz, 3H). <sup>13</sup>C NMR (100 MHz, DMSO) δ 165.4, 162.6, 160.8, 139.1, 131.1, 130.9, 129.4, 129.0, 123.9, 120.9, 117.8, 62.1, 52.3, 13.9.

HRMS (ESI) Calc. for C<sub>14</sub>H<sub>15</sub>N<sub>2</sub>O<sub>5</sub><sup>+</sup> [M+H]<sup>+</sup>: 291.0975; found: 251.0984.

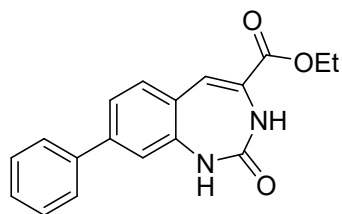

**ethyl 2-oxo-8-phenyl-2,3-dihydro-1H-benzo[d][1,3]diazepine-4-carboxylate (3l)**



17.2 mg, 56% yield, yellow solid· MP = 214 – 215 °C, <sup>1</sup>H NMR (500 MHz, DMSO-*d*<sub>6</sub>) δ 8.98 (d, *J* = 2.3 Hz, 1H), 7.61 (dd, *J* = 8.2, 1.4 Hz, 2H), 7.47 (t, *J* = 7.6 Hz, 2H), 7.44 – 7.35 (m, 2H), 7.30 (dd, *J* = 8.1, 1.6 Hz, 1H), 7.28 – 7.23 (m, 2H), 6.90 (d, *J* = 1.7 Hz, 1H), 4.26 (q, *J* = 7.1 Hz, 2H), 1.30 (t, *J* = 7.1 Hz, 3H). <sup>13</sup>C NMR (100 MHz, DMSO) δ 162.9, 161.0, 142.2, 139.4, 138.8, 131.5, 129.0, 128.0, 127.0, 126.3, 123.7, 121.7, 118.9, 118.3, 61.9, 14.0.

HRMS (ESI) Calc. for C<sub>18</sub>H<sub>17</sub>N<sub>2</sub>O<sub>3</sub><sup>+</sup> [M+H]<sup>+</sup>:309.1234; found: 309.1226.

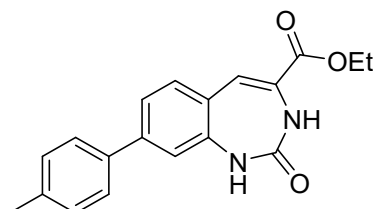

**ethyl 2-oxo-8-(*p*-tolyl)-2,3-dihydro-1*H*-benzo[*d*][1,3]diazepine-4-carboxylate (3m)**

19.6 mg, 61% yield, yellow solid· MP = 205 – 206 °C, <sup>1</sup>H NMR (500 MHz, DMSO-*d*<sub>6</sub>) δ 8.95 (d, *J* = 2.3 Hz, 1H), 7.51 (d, *J* = 8.2 Hz, 2H), 7.40 (d, *J* = 2.1 Hz, 1H), 7.31 – 7.25 (m, 3H), 7.27 – 7.21 (m, 2H), 6.89 (d, *J* = 1.7 Hz, 1H), 4.26 (q, *J* = 7.0 Hz, 2H), 2.34 (s, 3H), 1.30 (t, *J* = 7.1 Hz, 3H). <sup>13</sup>C NMR (100 MHz, DMSO) δ 163.3, 161.4, 142.6, 139.9, 138.0, 136.4, 132.0, 130.1, 127.3, 126.6, 123.8, 121.8, 119.5, 118.4, 62.4, 21.1, 14.5.

HRMS (ESI) Calc. for C<sub>19</sub>H<sub>19</sub>N<sub>2</sub>O<sub>3</sub><sup>+</sup> [M+H]<sup>+</sup>:323.1390; found: 323.1392.

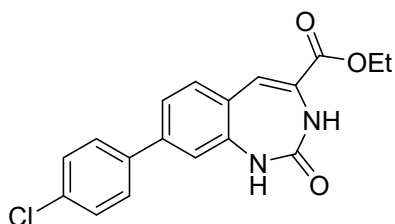

**ethyl 8-(4-chlorophenyl)-2-oxo-2,3-dihydro-1*H*-benzo[*d*][1,3]diazepine-4-carboxylate (3n)**

21.6 mg, 63% yield, yellow solid· MP = 208 – 209 °C, <sup>1</sup>H NMR (500 MHz, DMSO-*d*<sub>6</sub>) δ 8.97 (d, *J* = 2.3 Hz, 1H), 7.68 – 7.60 (m, 2H), 7.57 – 7.48 (m, 2H), 7.44 (t, *J* = 2.1 Hz, 1H), 7.31 (dd, *J* = 8.0, 1.8 Hz, 1H), 7.30 – 7.21 (m, 2H), 6.90 (d, *J* = 1.8 Hz, 1H), 4.26 (q, *J* = 7.1 Hz, 2H), 1.30 (t, *J* = 7.1 Hz, 3H). <sup>13</sup>C NMR (100 MHz, DMSO) δ 163.3, 161.4, 141.2, 139.9, 138.1, 133.3, 132.1, 129.5, 128.6, 127.7, 124.5, 122.1, 119.3, 118.6, 62.4, 14.5.

HRMS (ESI) Calc. for C<sub>18</sub>H<sub>16</sub>ClN<sub>2</sub>O<sub>3</sub><sup>+</sup> [M+H]<sup>+</sup>:343.0844; found: 343.0849.

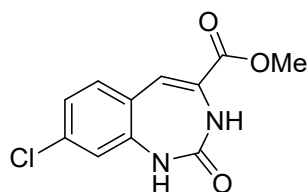

**methyl 8-chloro-2-oxo-2,3-dihydro-1*H*-benzo[*d*][1,3]diazepine-4-carboxylate (3o)**

12.3 mg, 49% yield, yellow solid· MP = 175 – 176 °C, <sup>1</sup>H NMR (400 MHz, Chloroform-*d*) δ 7.33 (s, 1H), 7.00 – 6.88 (m, 3H), 6.77 (d, *J* = 1.8 Hz, 1H), 6.73 (t, *J* = 1.3 Hz, 1H), 3.88 (s, 3H). <sup>13</sup>C NMR (100 MHz, CDCl<sub>3</sub>) δ 163.2, 160.3, 138.9, 136.4, 132.1, 126.4, 124.3, 122.9, 120.0, 118.4, 53.2.

HRMS (ESI) Calc. for  $C_{11}H_{10}ClN_2O_3^+$   $[M+H]^+$ :253.0374; found: 253.0376.

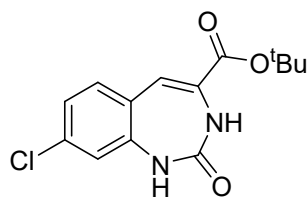

**tert-butyl 8-chloro-2-oxo-2,3-dihydro-1H-benzo[d][1,3]diazepine-4-carboxylate (3p)**

19.9 mg, 68% yield, yellow solid. MP = 161 – 162 °C,  $^1H$  NMR (500 MHz, DMSO- $d_6$ )  $\delta$  9.02 (d,  $J$  = 2.7 Hz, 1H), 7.38 (t,  $J$  = 2.1 Hz, 1H), 7.18 (d,  $J$  = 8.3 Hz, 1H), 7.03 (dd,  $J$  = 8.3, 2.0 Hz, 1H), 6.98 (d,  $J$  = 2.1 Hz, 1H), 6.75 (d,  $J$  = 1.6 Hz, 1H), 1.50 (s, 9H).  $^{13}C$  NMR (100 MHz, DMSO)  $\delta$  161.8, 160.7, 140.3, 134.3, 132.4, 128.4, 123.7, 123.3, 119.6, 117.8, 82.7, 27.6.

HRMS (ESI) Calc. for  $C_{14}H_{16}ClN_2O_3^+$   $[M+H]^+$ :295.0844; found: 295.0843.

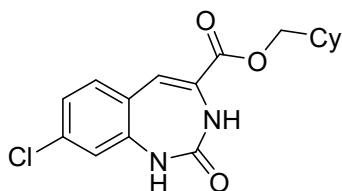

**cyclohexylmethyl 8-chloro-2-oxo-2,3-dihydro-1H-benzo[d][1,3]diazepine-4-carboxylate (3q)**

19.0 mg, 57% yield, yellow solid, MP = 167 – 168 °C,  $^1H$  NMR (500 MHz, DMSO- $d_6$ )  $\delta$  9.04 (d,  $J$  = 2.5 Hz, 1H), 7.75 – 7.38 (m, 1H), 7.22 (dd,  $J$  = 8.6, 5.1 Hz, 1H), 7.03 (dt,  $J$  = 8.2, 3.3 Hz, 1H), 6.99 (d,  $J$  = 2.2 Hz, 1H), 6.84 (d,  $J$  = 3.9 Hz, 1H), 4.01 (d,  $J$  = 6.4 Hz, 2H), 1.82 – 1.52 (m, 6H), 1.33 – 1.08 (m, 4H), 0.99 (t,  $J$  = 12.2 Hz, 2H).  $^{13}C$  NMR (100 MHz, DMSO)  $\delta$  162.8, 160.7, 140.4, 134.5, 132.6, 127.3, 123.6, 123.3, 119.7, 118.5, 70.6, 29.0, 25.9, 25.2.

HRMS (ESI) Calc. for  $C_{17}H_{20}ClN_2O_3^+$   $[M+H]^+$ :335.1157; found:335.1158.

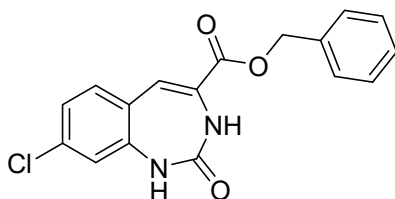

**benzyl 8-chloro-2-oxo-2,3-dihydro-1H-benzo[d][1,3]diazepine-4-carboxylate (3r)**

23.2 mg, 71% yield, yellow solid. MP = 209 – 210 °C,  $^1H$  NMR (500 MHz, DMSO- $d_6$ )  $\delta$  9.04 (d,  $J$  = 2.3 Hz, 1H), 7.62 (d,  $J$  = 2.1 Hz, 1H), 7.49 – 7.43 (m, 2H), 7.41 (t,  $J$  = 7.3 Hz, 2H), 7.38 – 7.34 (m, 1H), 7.24 (d,  $J$  = 8.4 Hz, 1H), 7.04 (dd,  $J$  = 8.3, 2.2 Hz, 1H), 7.00 (d,  $J$  = 2.1 Hz, 1H), 6.91 (d,  $J$  = 1.9 Hz, 1H), 5.28 (s, 2H).  $^{13}C$  NMR (100 MHz, DMSO)  $\delta$  163.13, 161.24, 140.88, 136.02, 135.05, 133.03, 129.00, 128.77, 128.65, 127.71, 123.99, 123.72, 120.14, 119.49, 67.72.

HRMS (ESI) Calc. for  $C_{17}H_{14}ClN_2O_3^+$   $[M+H]^+$ :329.0687; found:329.0681.

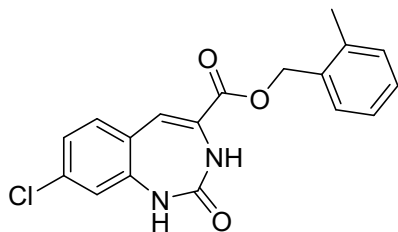

**2-methylbenzyl 8-chloro-2-oxo-2,3-dihydro-1H-benzo[d][1,3]diazepine-4-carboxylate (3s)**

22.5 mg, 66% yield, yellow solid· MP = 191 – 192 °C, <sup>1</sup>H NMR (500 MHz, DMSO-*d*<sub>6</sub>) δ 9.05 (d, *J* = 2.3 Hz, 1H), 7.67 – 7.48 (m, 1H), 7.39 (d, *J* = 7.4 Hz, 1H), 7.29-7.19 (m, 4H), 7.04-7.01 (m, 1H), 6.99 (d, *J* = 2.1 Hz, 1H), 6.87 (d, *J* = 1.9 Hz, 1H), 5.29 (s, 2H), 2.34 (s, 3H). <sup>13</sup>C NMR (100 MHz, DMSO) δ 162.6, 160.8, 140.4, 136.9, 134.6, 133.4, 132.6, 130.2, 129.2, 128.6, 127.2, 125.9, 123.5, 123.2, 119.6, 118.9, 65.8, 18.5.

HRMS (ESI) Calc. for C<sub>18</sub>H<sub>16</sub>ClN<sub>2</sub>O<sub>3</sub><sup>+</sup> [M+H]<sup>+</sup>:343.0844; found: 343.0843.

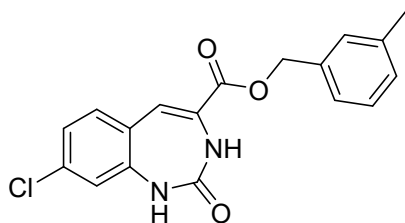

**3-methylbenzyl 8-chloro-2-oxo-2,3-dihydro-1H-benzo[d][1,3]diazepine-4-carboxylate (3t)**

18.1 mg, 53% yield, yellow solid· MP = 186 – 187 °C, <sup>1</sup>H NMR (500 MHz, DMSO-*d*<sub>6</sub>) δ 9.04 (d, *J* = 2.2 Hz, 1H), 7.66 – 7.58 (m, 1H), 7.34 – 7.20 (m, 4H), 7.17 (d, *J* = 7.5 Hz, 1H), 7.04 (dt, *J* = 8.3, 1.8 Hz, 1H), 6.99 (d, *J* = 2.1 Hz, 1H), 6.90 (d, *J* = 1.9 Hz, 1H), 5.24 (s, 2H), 2.32 (s, 3H). <sup>13</sup>C NMR (100 MHz, DMSO) δ 162.6, 160.7, 140.4, 137.7, 135.4, 134.5, 132.5, 128.9, 128.8, 128.4, 127.2, 125., 123.5, 123.2, 119.6, 118.9, 67.3, 20.9.

HRMS (ESI) Calc. for C<sub>18</sub>H<sub>16</sub>ClN<sub>2</sub>O<sub>3</sub><sup>+</sup> [M+H]<sup>+</sup>:343.0844; found:343.0842.

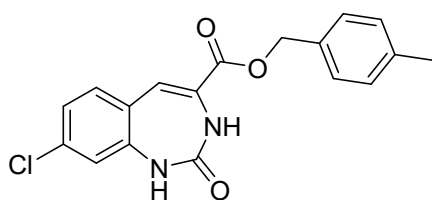

**4-methylbenzyl 8-chloro-2-oxo-2,3-dihydro-1H-benzo[d][1,3]diazepine-4-carboxylate (3u)**

19.8 mg, 58% yield, yellow solid· MP = 185 – 186 °C, <sup>1</sup>H NMR (400 MHz, DMSO-*d*<sub>6</sub>) δ 9.04 (s, 1H), 7.58 (s, 1H), 7.44 – 7.32 (m, 2H), 7.22 (tt, *J* = 7.4, 4.9, 4.3 Hz, 3H), 7.10 – 6.98 (m, 2H), 6.89 (d, *J* = 2.6 Hz, 1H), 5.23 (d, *J* = 2.9 Hz, 2H). <sup>13</sup>C NMR (100 MHz, DMSO) δ 162.7, 160.8, 140.4, 137.8, 134.6, 132.6, 132.5, 129.1, 128.4, 127.3, 123.5, 123.3, 119.7, 118.9, 67.3, 20.8.

HRMS (ESI) Calc. for C<sub>18</sub>H<sub>16</sub>ClN<sub>2</sub>O<sub>3</sub><sup>+</sup> [M+H]<sup>+</sup>:343.0844; found: 343.0839.

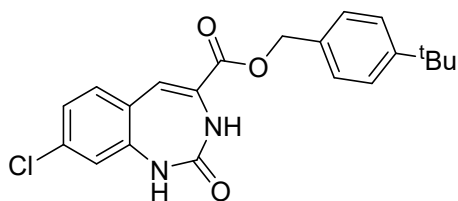

**4-(tert-butyl)benzyl 8-chloro-2-oxo-2,3-dihydro-1H-benzo[d][1,3]diazepine-4-carboxylate (3v)**

23.4 mg, 61% yield, yellow solid· MP = 196 – 197 °C, <sup>1</sup>H NMR (500 MHz, DMSO-*d*<sub>6</sub>) δ 9.04 (s, 1H), 7.59 (s, 1H), 7.48 – 7.33 (m, 4H), 7.30 – 7.18 (m, 1H), 7.04 (dt, *J* = 8.3, 2.4 Hz, 1H), 6.99 (d, *J* = 2.0 Hz, 1H), 6.89 (d, *J* = 2.3 Hz, 1H), 5.23 (d, *J* = 2.1 Hz, 2H), 1.27 (d, *J* = 2.4 Hz, 9H). <sup>13</sup>C NMR (100 MHz, DMSO) δ 162.7, 160.8, 150.9, 140.4, 134.6, 132.6, 128.3, 128.2, 127.3, 125.4, 125.3, 123.6, 123.3, 119.7, 119.0, 67.2, 34.4, 31.1, 31.1.

HRMS (ESI) Calc. for C<sub>21</sub>H<sub>20</sub>ClN<sub>2</sub>O<sub>3</sub><sup>-</sup> [M-H]<sup>-</sup>:383.1168; found:383.1155.

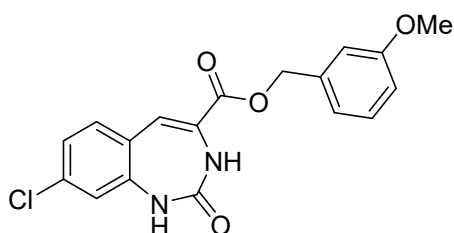

**3-methoxybenzyl 8-chloro-2-oxo-2,3-dihydro-1H-benzo[d][1,3]diazepine-4-carboxylate (3w)**

20.0 mg, 56% yield, yellow solid· MP = 190 – 191 °C, <sup>1</sup>H NMR (500 MHz, DMSO-*d*<sub>6</sub>) δ 9.04 (d, *J* = 2.2 Hz, 1H), 7.62 (d, *J* = 2.2 Hz, 1H), 7.31 (d, *J* = 8.2 Hz, 1H), 7.23 (d, *J* = 8.3 Hz, 1H), 7.08 – 6.98 (m, 4H), 6.95 – 6.89 (m, 2H), 5.24 (s, 2H), 3.76 (s, 3H). <sup>13</sup>C NMR (100 MHz, DMSO) δ 162.6, 160.8, 159.3, 140.4, 137.0, 134.6, 132.5, 129.6, 127.2, 123.5, 123.2, 120.2, 119.6, 119.1, 113.7, 67.1, 55.1.

HRMS (ESI) Calc. for C<sub>18</sub>H<sub>16</sub>ClN<sub>2</sub>O<sub>4</sub><sup>+</sup> [M+H]<sup>+</sup>:359.0793; found:359.0791.

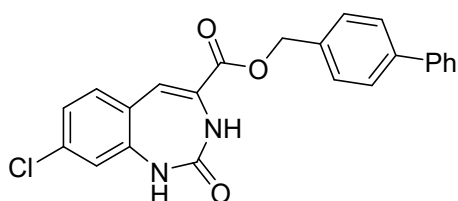

**[1,1'-biphenyl]-4-ylmethyl 8-chloro-2-oxo-2,3-dihydro-1H-benzo[d][1,3]diazepine-4-carboxylate (3x)**

21.4 mg, 53% yield, yellow solid, MP = 196 – 197 °C, <sup>1</sup>H NMR (500 MHz, DMSO-*d*<sub>6</sub>) δ 9.05 (d, *J* = 2.3 Hz, 1H), 7.74 – 7.66 (m, 4H), 7.64 (d, *J* = 2.2 Hz, 1H), 7.55 (d, *J* = 8.2 Hz, 2H), 7.47 (t, *J* = 7.7 Hz, 2H), 7.38 (d, *J* = 7.4 Hz, 1H), 7.24 (d, *J* = 8.3 Hz, 1H), 7.05 (dd, *J* = 8.3, 2.1 Hz, 1H), 7.00 (d, *J* = 2.1 Hz, 1H), 6.94 (d, *J* = 1.7 Hz, 1H), 5.33 (s, 2H). <sup>13</sup>C NMR (100 MHz, DMSO) δ 162.8, 160.9, 140.5, 140.3, 139.8, 134.8, 134.7, 132.6, 129.1, 129.0, 127.7, 127.3, 126.9, 126.8, 123.6, 123.3, 119.7, 119.2, 67.1

HRMS (ESI) Calc. for C<sub>23</sub>H<sub>16</sub>ClN<sub>2</sub>O<sub>3</sub><sup>-</sup> [M-H]<sup>-</sup>:403.0855; found: 403.0860.

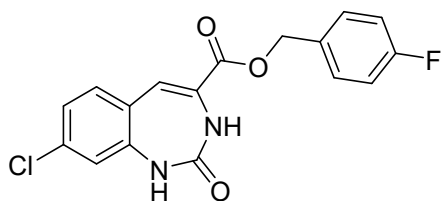

**4-fluorobenzyl 8-chloro-2-oxo-2,3-dihydro-1H-benzo[d][1,3]diazepine-4-carboxylate (3y)**

17.9 mg, 52% yield, yellow solid, MP = 189 – 190 °C, <sup>1</sup>H NMR (500 MHz, DMSO-*d*<sub>6</sub>) δ 9.03 (d, *J* = 2.2 Hz, 1H), 7.62 (s, 1H), 7.56 – 7.49 (m, 2H), 7.28 – 7.20 (m, 3H), 7.04 (dd, *J* = 8.3, 2.1 Hz, 1H), 6.99 (d, *J* = 2.1 Hz, 1H), 6.90 (s, 1H), 5.26 (s, 1H). <sup>13</sup>C NMR (100 MHz, DMSO-*d*<sub>6</sub>) δ 163.3, 162.7, 160.9, 160.8, 140.5, 134.6, 132.6, 131.9, 131.8, 130.7 (d, *J* = 8.4 Hz), 127.3, 123.4 (d, *J* = 25.3 Hz), 119.4 (d, *J* = 57.7 Hz), 115.4 (d, *J* = 21.4 Hz), 66.6. <sup>19</sup>F NMR (376 MHz, DMSO-*d*<sub>6</sub>) δ -113.7.

HRMS (ESI) Calc. for C<sub>17</sub>H<sub>13</sub>ClF<sub>1</sub>N<sub>2</sub>O<sub>3</sub><sup>+</sup> [M+H]<sup>+</sup>:347.0593; found:347.0598.

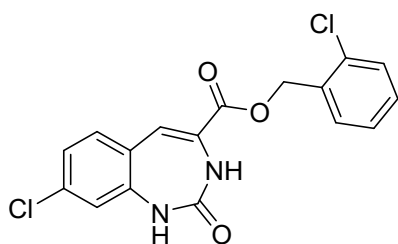

**2-chlorobenzyl 8-chloro-2-oxo-2,3-dihydro-1H-benzo[d][1,3]diazepine-4-carboxylate (3z)**

26.1 mg, 72% yield, yellow solid, MP = 195 – 196 °C, <sup>1</sup>H NMR (400 MHz, DMSO-*d*<sub>6</sub>) δ 9.05 (d, *J* = 2.9 Hz, 1H), 7.69 – 7.58 (m, 2H), 7.53 (ddd, *J* = 9.2, 5.2, 2.3 Hz, 1H), 7.45 – 7.37 (m, 2H), 7.24 (d, *J* = 8.5 Hz, 1H), 7.08 – 6.97 (m, 2H), 6.92 (d, *J* = 2.0 Hz, 1H), 5.36 (s, 1H). <sup>13</sup>C NMR (100 MHz, DMSO) δ 162.9, 161.2, 140.9, 135.1, 133.3, 133.1, 133.0, 130.9, 130.7, 129.9, 127.9, 127.4, 123.9, 123.7, 120.1, 119.7, 65.1.

HRMS (ESI) Calc. for C<sub>17</sub>H<sub>11</sub>Cl<sub>2</sub>N<sub>2</sub>O<sub>3</sub><sup>-</sup> [M-H]<sup>-</sup>:361.0152; found:361.0157.

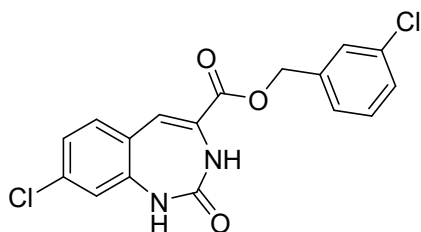

**3-chlorobenzyl 8-chloro-2-oxo-2,3-dihydro-1H-benzo[d][1,3]diazepine-4-carboxylate (3aa)**

30.7 mg, 85% yield, yellow solid, MP = 179 – 180 °C, <sup>1</sup>H NMR (500 MHz, DMSO-*d*<sub>6</sub>) δ 9.04 (d, *J* = 2.3 Hz, 1H), 7.68 (t, *J* = 1.9 Hz, 1H), 7.56 (dd, *J* = 2.0, 0.9 Hz, 1H), 7.44 (d, *J* = 1.3 Hz, 3H), 7.24 (d, *J* = 8.3 Hz, 1H), 7.05 (dd, *J* = 8.3, 2.1 Hz, 1H), 7.00 (d, *J* = 2.2 Hz, 1H), 6.94 (d, *J* = 1.7 Hz, 1H), 5.28 (s, 2H). <sup>13</sup>C NMR (100 MHz, DMSO) δ 162.6, 160.8, 140.5, 138.1, 134.6, 133.1, 132.6, 130.5, 128.2, 128.0, 127.2, 126.8, 126.8, 123.5, 123.3, 119.7, 119.3, 66.4.

HRMS (ESI) Calc. for C<sub>17</sub>H<sub>13</sub>Cl<sub>2</sub>N<sub>2</sub>O<sub>3</sub><sup>+</sup> [M+H]<sup>+</sup>:363.0298; found: 363.0305.

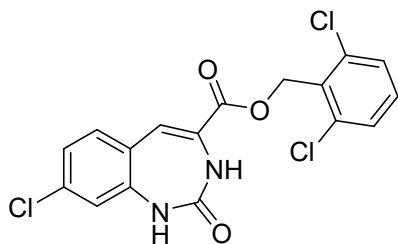

**2,6-dichlorobenzyl 8-chloro-2-oxo-2,3-dihydro-1H-benzo[d][1,3]diazepine-4-carboxylate (3ab)**

34.3 mg, 87% yield, yellow solid, MP = 215 – 216 °C, <sup>1</sup>H NMR (500 MHz, DMSO-*d*<sub>6</sub>) δ 9.04 (d, *J* = 2.3 Hz, 1H), 7.63 (t, *J* = 2.0 Hz, 1H), 7.60 – 7.55 (m, 2H), 7.48 (dd, *J* = 8.8, 7.3 Hz, 1H), 7.20 (d, *J* = 8.3 Hz, 1H), 7.02 (dd, *J* = 8.3, 2.1 Hz, 1H), 6.99 (d, *J* = 2.1 Hz, 1H), 6.80 (d, *J* = 1.7 Hz, 1H), 5.48 (s, 2H). <sup>13</sup>C NMR (100 MHz, DMSO) δ 162.4, 160.8, 140.4, 136.1, 134.6, 132.6, 131.8, 130.4, 128.8, 126.8, 123.3, 123.2, 119.6, 119.3, 62.4.

HRMS (ESI) Calc. for C<sub>17</sub>H<sub>12</sub>Cl<sub>3</sub>N<sub>2</sub>O<sub>3</sub><sup>+</sup> [M+H]<sup>+</sup>:396.9908; found:396.9899.

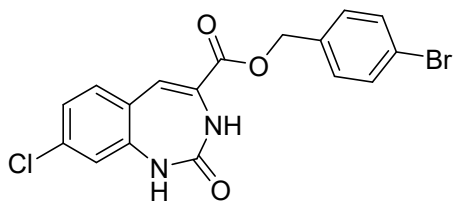

**4-bromobenzyl 8-chloro-2-oxo-2,3-dihydro-1H-benzo[d][1,3]diazepine-4-carboxylate (3ac)**

30.7 mg, 76% yield, yellow solid, MP = 205 – 206 °C, <sup>1</sup>H NMR (500 MHz, DMSO-*d*<sub>6</sub>) δ 9.04 (d, *J* = 2.3 Hz, 1H), 7.64 (d, *J* = 2.1 Hz, 1H), 7.62 – 7.57 (m, 2H), 7.46 – 7.40 (m, 2H), 7.23 (d, *J* = 8.3 Hz, 1H), 7.05 (dd, *J* = 8.3, 2.2 Hz, 1H), 6.99 (d, *J* = 2.2 Hz, 1H), 6.91 (d, *J* = 1.8 Hz, 1H), 5.25 (s, 2H). <sup>13</sup>C NMR (100 MHz, DMSO) δ 163.0, 161.2, 140.8, 135.4, 135.0, 132.9, 131.8, 130.8, 127.5, 123.9, 123.6, 121.9, 120.1, 119.6, 66.8.

HRMS (ESI) Calc. for C<sub>17</sub>H<sub>11</sub>BrClN<sub>2</sub>O<sub>3</sub><sup>-</sup> [M-H]<sup>-</sup>:404.9647; found:404.9647.

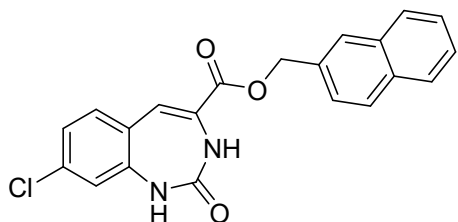

**naphthalen-2-ylmethyl 8-chloro-2-oxo-2,3-dihydro-1H-benzo[d][1,3]diazepine-4-carboxylate (3ad)**

28.3 mg, 75% yield, yellow solid, MP = 207 – 208 °C, <sup>1</sup>H NMR (500 MHz, DMSO-*d*<sub>6</sub>) δ 9.04 (d, *J* = 2.3 Hz, 1H), 8.01 – 7.98 (m, 1H), 7.98 – 7.89 (m, 3H), 7.65 (t, *J* = 2.1 Hz, 1H), 7.59 (dd, *J* = 8.5, 1.8 Hz, 1H), 7.56 – 7.51 (m, 2H), 7.23 (d, *J* = 8.3 Hz, 1H), 7.03 (dd, *J* = 8.3, 2.1 Hz, 1H), 6.99 (d, *J* = 2.1 Hz, 1H), 6.94 (d, *J* = 1.7 Hz, 1H), 5.44 (s, 2H). <sup>13</sup>C NMR (100 MHz, DMSO) δ 162.7, 160.8, 140.4, 134.6, 133.1, 132.7, 132.6, 128.2, 127.9, 127.6, 127.2, 127.1, 126.4, 126.0, 123.5, 123.2, 119.6, 119.1, 67.4.

HRMS (ESI) Calc. for C<sub>21</sub>H<sub>16</sub>ClN<sub>2</sub>O<sub>3</sub><sup>+</sup> [M+H]<sup>+</sup>:379.0844; found:379.0849.

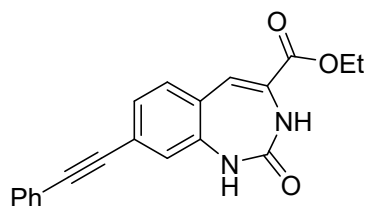

**ethyl 2-oxo-8-(phenylethynyl)-2,3-dihydro-1H-benzo[d][1,3]diazepine-4-carboxylate (4)**

28.8 mg, 88% yield, yellow solid, MP = 197 – 198 °C, <sup>1</sup>H NMR (500 MHz, DMSO-*d*<sub>6</sub>) δ 9.04 (d, *J* = 2.4 Hz, 1H), 7.59 – 7.49 (m, 3H), 7.43 (dt, *J* = 5.1, 1.9 Hz, 3H), 7.26 – 7.20 (m, 1H), 7.15 (dd, *J* = 7.9, 1.7 Hz, 1H), 7.08 (d, *J* = 1.5 Hz, 1H), 6.85 (d, *J* = 1.9 Hz, 1H), 4.25 (q, *J* = 7.1 Hz, 2H), 1.29 (t, *J* = 7.1 Hz, 3H). <sup>13</sup>C NMR (100 MHz, DMSO) δ 162.7, 160.7, 139.1, 131.4, 131.3, 129.1, 128.8, 127.7, 126.4, 125.7, 123.9, 122.4, 121.8, 118.4, 91.0, 88.6, 62.0, 14.0.

HRMS (ESI) Calc. for C<sub>20</sub>H<sub>17</sub>N<sub>2</sub>O<sub>3</sub><sup>+</sup> [M+H]<sup>+</sup>:333.1234; found:333,1225.

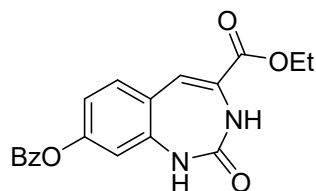

**ethyl 8-(benzyloxy)-2-oxo-2,3-dihydro-1H-benzo[d][1,3]diazepine-4-carboxylate (5)**

16.8 mg, 48% yield, yellow solid, MP = 193 – 194 °C, <sup>1</sup>H NMR (400 MHz, DMSO-*d*<sub>6</sub>) δ 9.05 (d, *J* = 2.2 Hz, 1H), 8.20 – 8.09 (m, 2H), 7.87 – 7.72 (m, 1H), 7.62 (t, *J* = 7.7 Hz, 2H), 7.51 (d, *J* = 2.1 Hz, 1H), 7.30 (d, *J* = 8.4 Hz, 1H), 6.96 (dd, *J* = 8.4, 2.2 Hz, 1H), 6.93 (d, *J* = 1.7 Hz, 1H), 6.85 (d, *J* = 2.3 Hz, 1H), 4.27 (q, *J* = 7.1 Hz, 2H), 1.31 (t, *J* = 7.1 Hz, 3H). <sup>13</sup>C NMR (100 MHz, DMSO) δ 164.73, 163.3, 161.4, 152.4, 140.7, 134.7, 132.5, 130.3, 129.5, 129.0, 127.5, 123.0, 119.4, 117.5, 113.9, 62.4, 14.5.

HRMS (ESI) Calc. for C<sub>19</sub>H<sub>17</sub>N<sub>2</sub>O<sub>5</sub><sup>+</sup> [M+H]<sup>+</sup>:353.1132; found:353.1129.

## VI. Copies of $^1\text{H}$ and $^{13}\text{C}$ NMR Spectra

(1b)

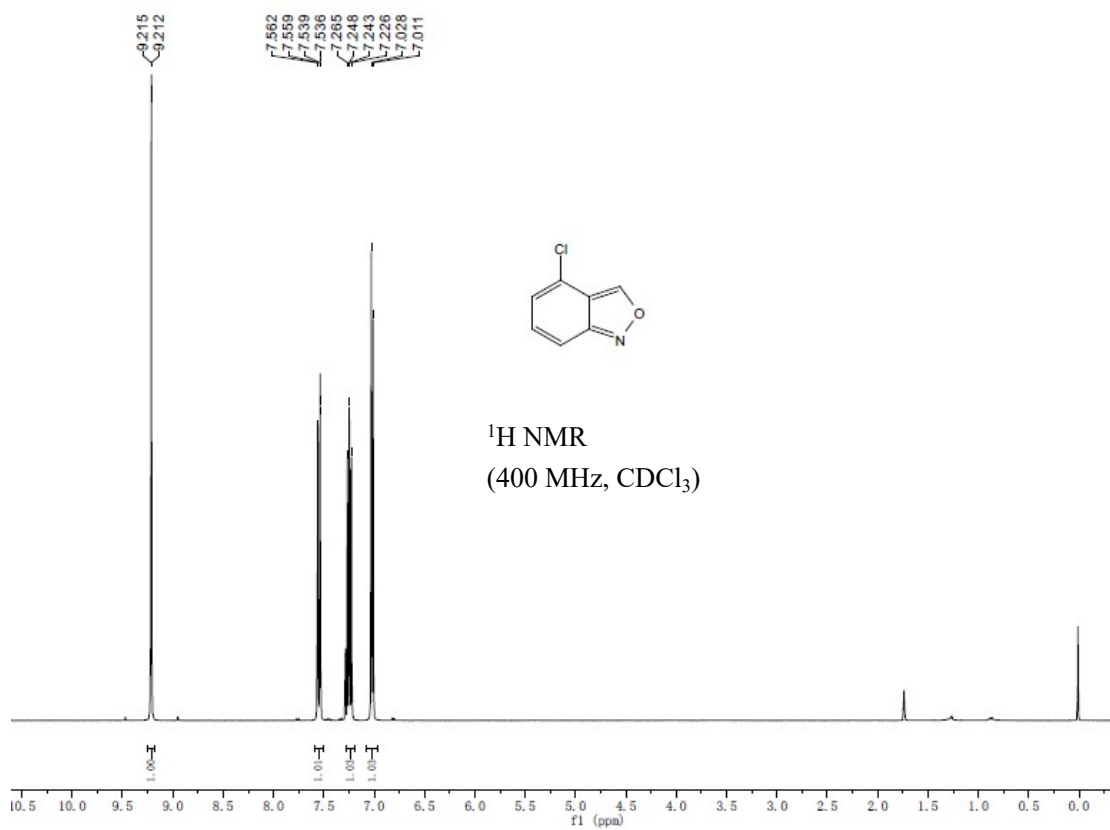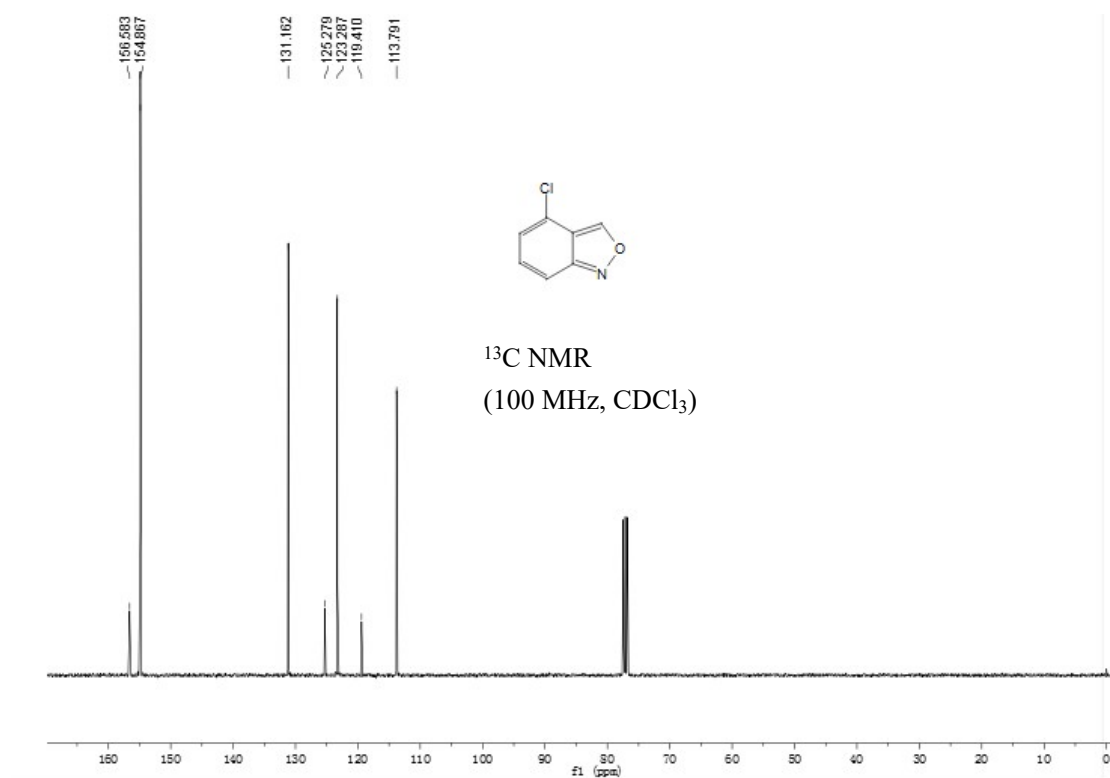



(1ae)

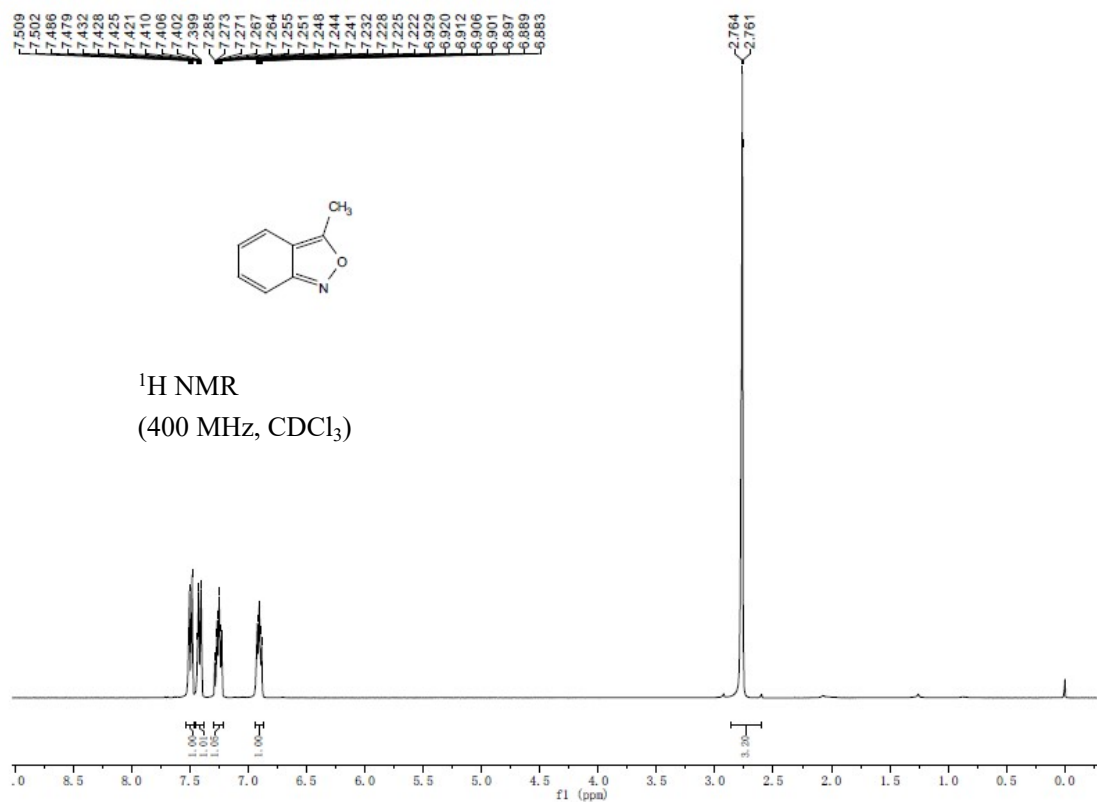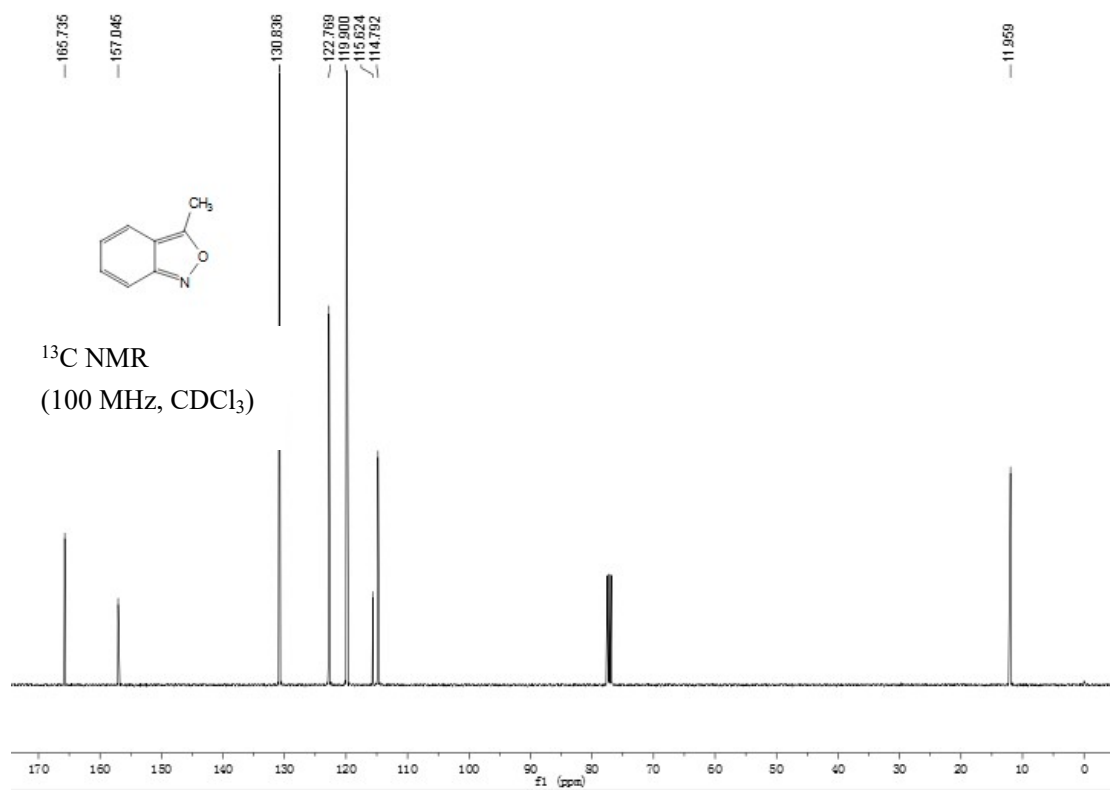

(1af)

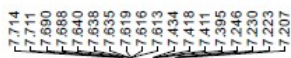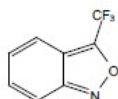

$^1\text{H}$  NMR  
(400 MHz,  $\text{CDCl}_3$ )

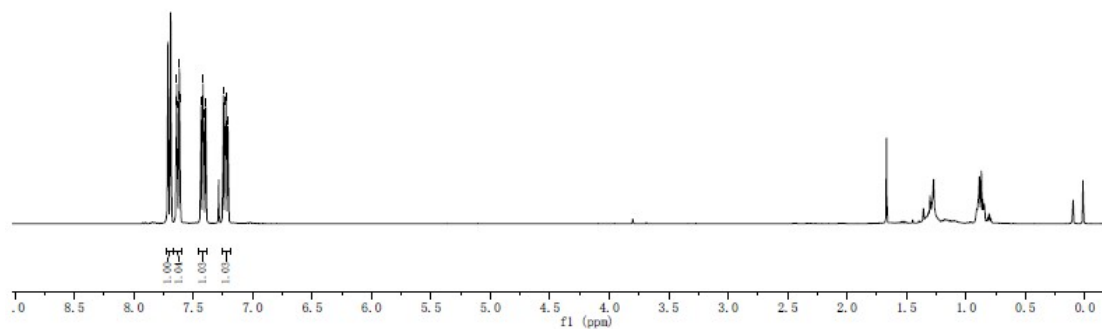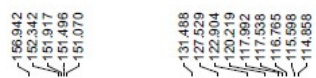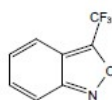

$^{13}\text{C}$  NMR  
(100 MHz,  $\text{CDCl}_3$ )

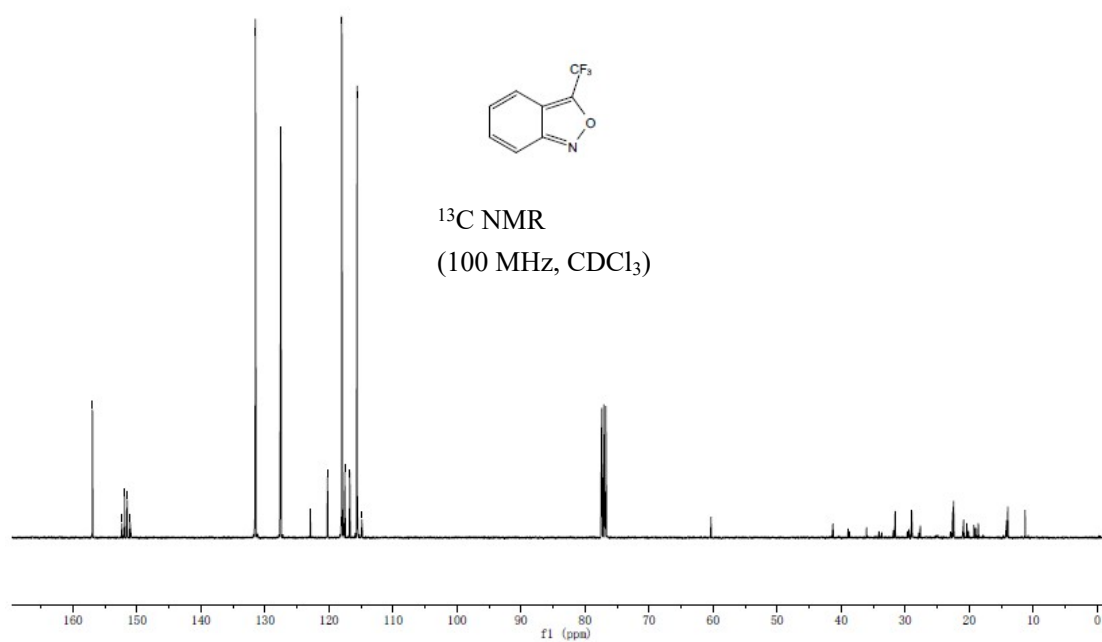

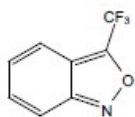

$^{19}\text{F}$  NMR  
(376 MHz,  $\text{CDCl}_3$ )

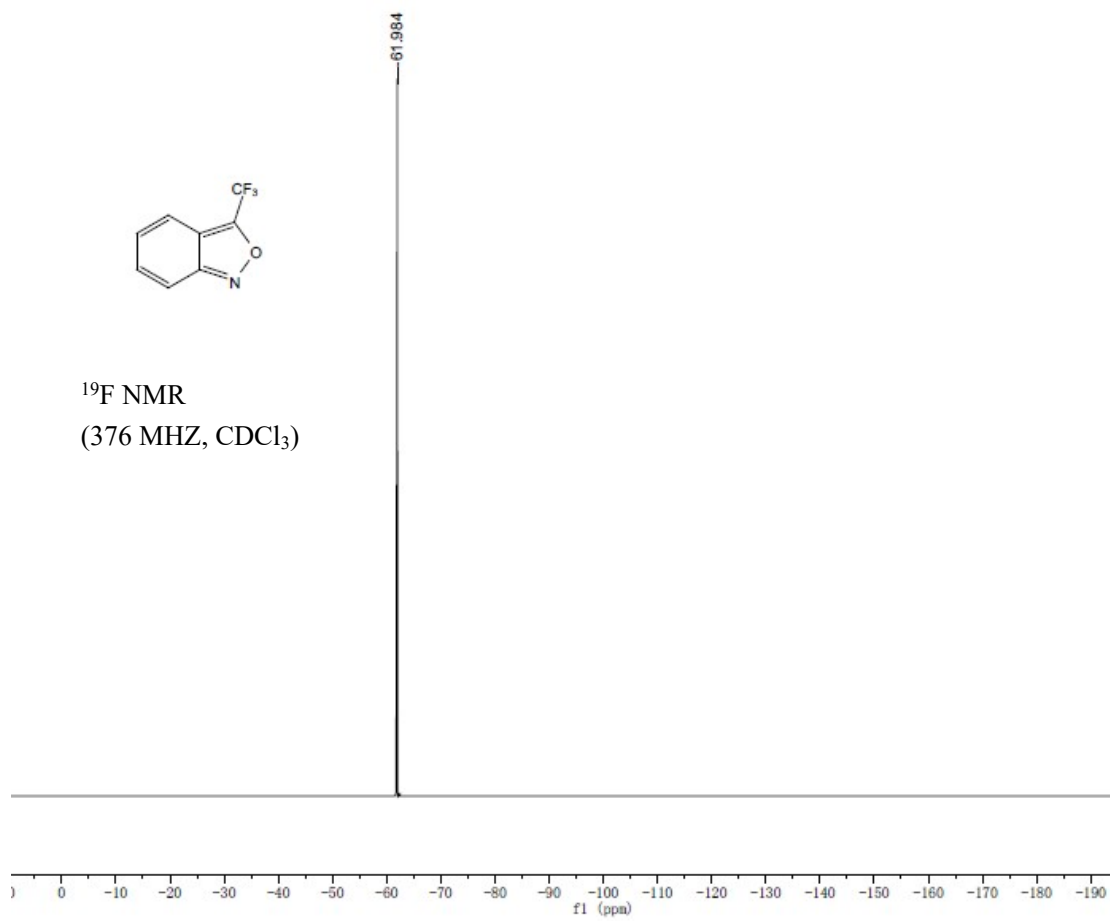

(3a)

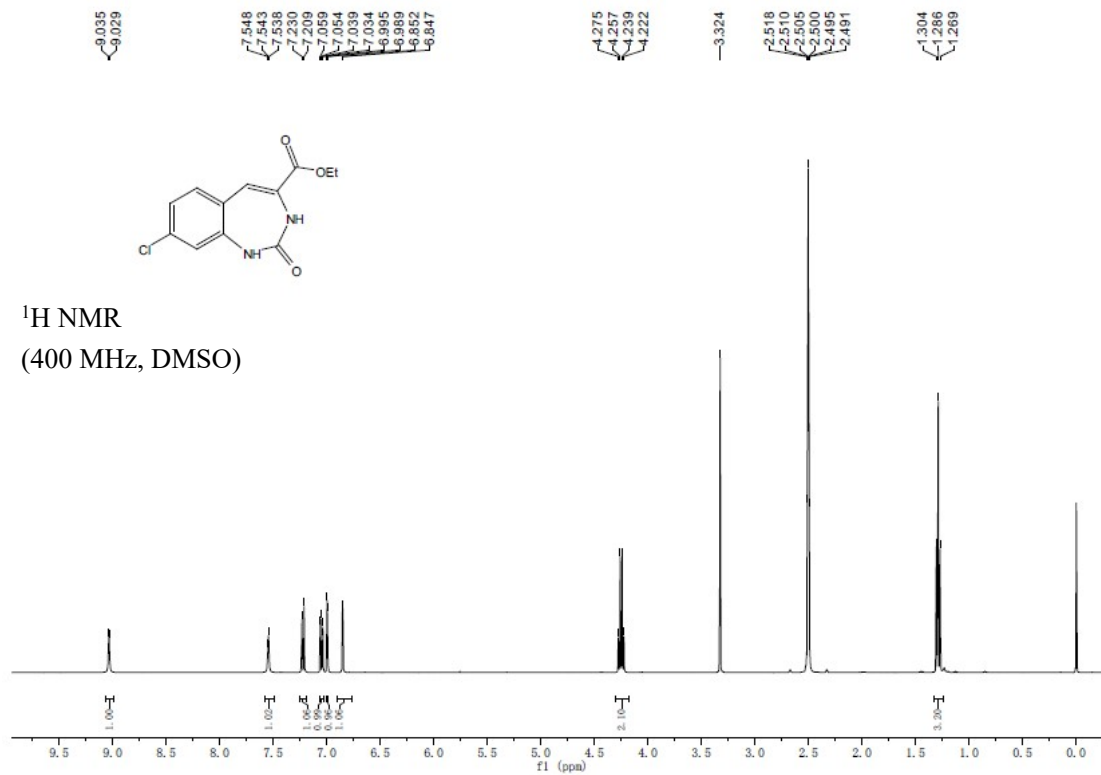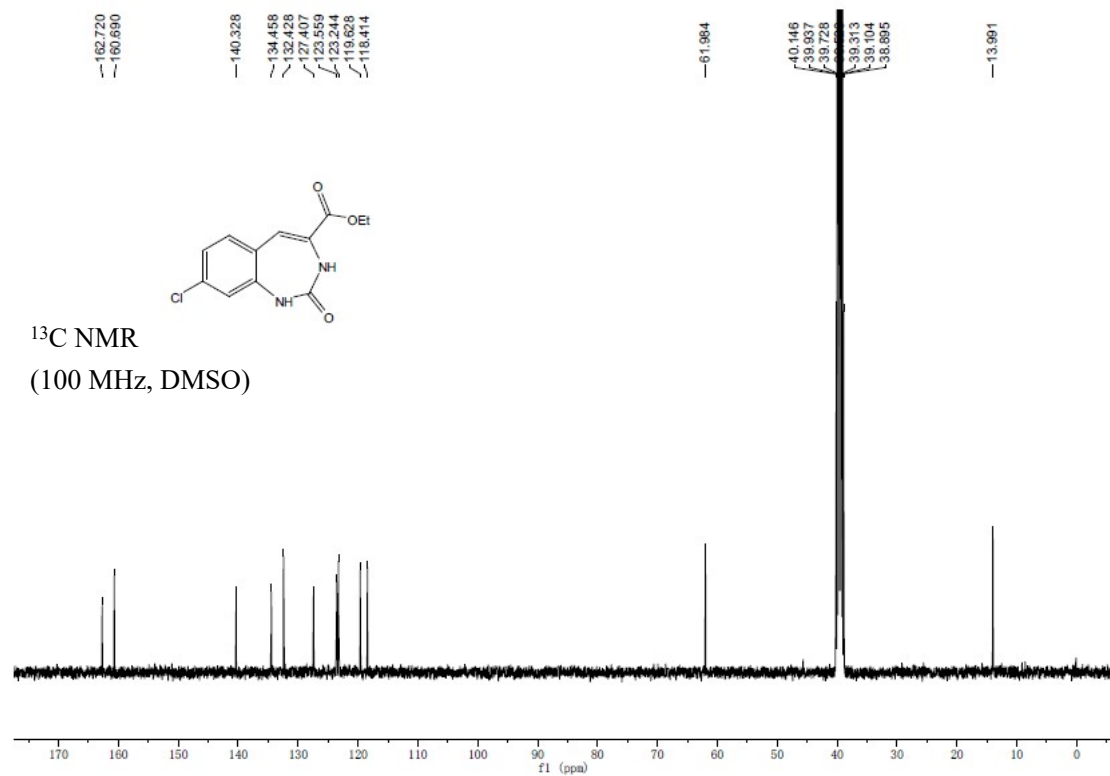

(3b)

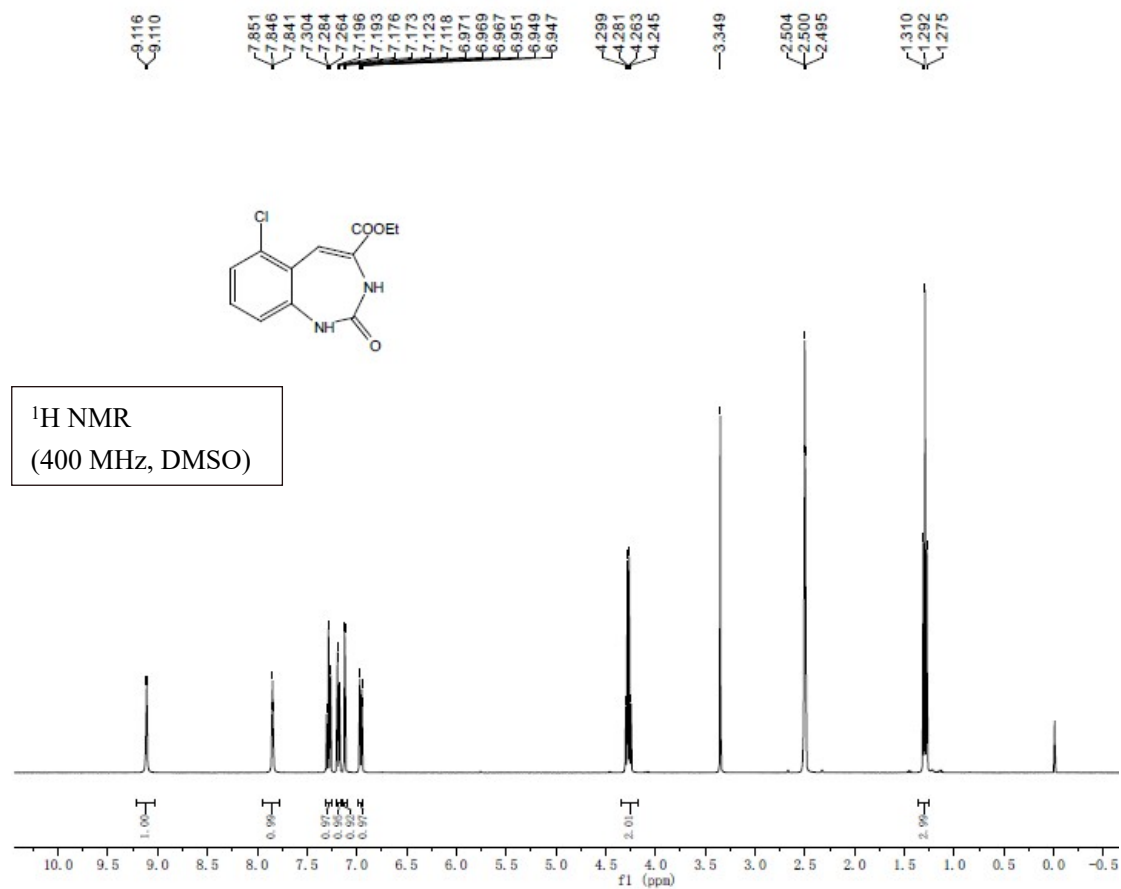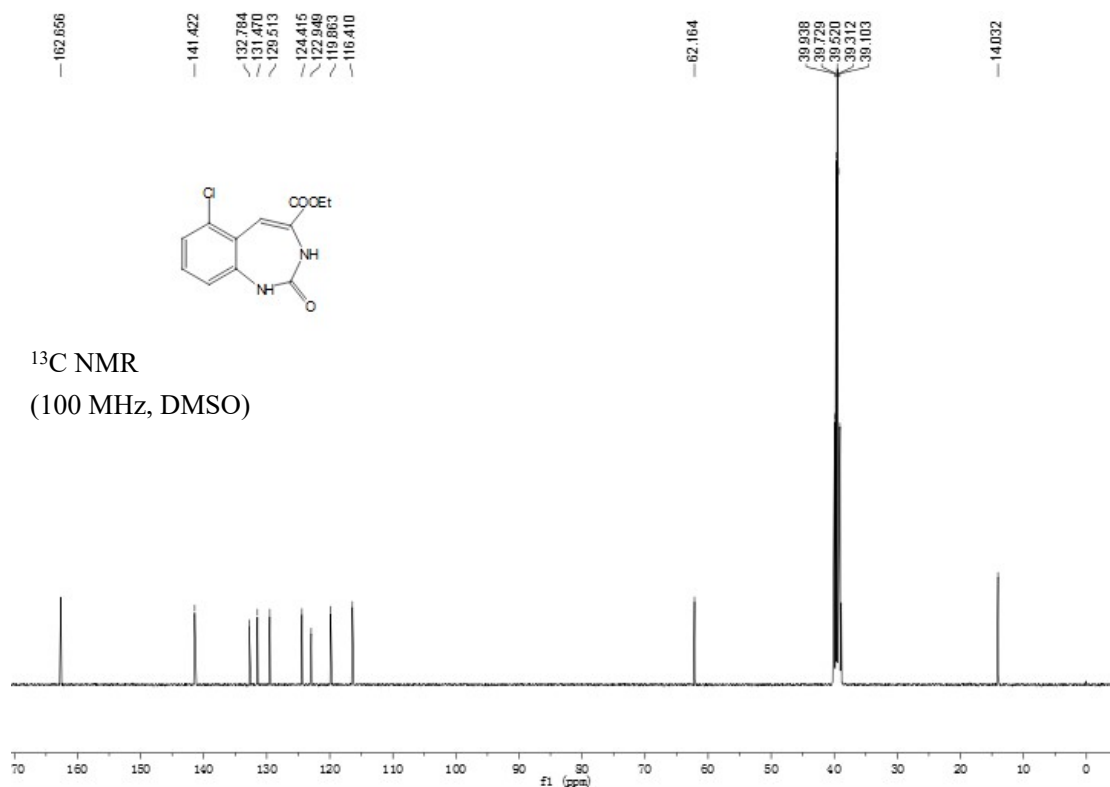

(3c)

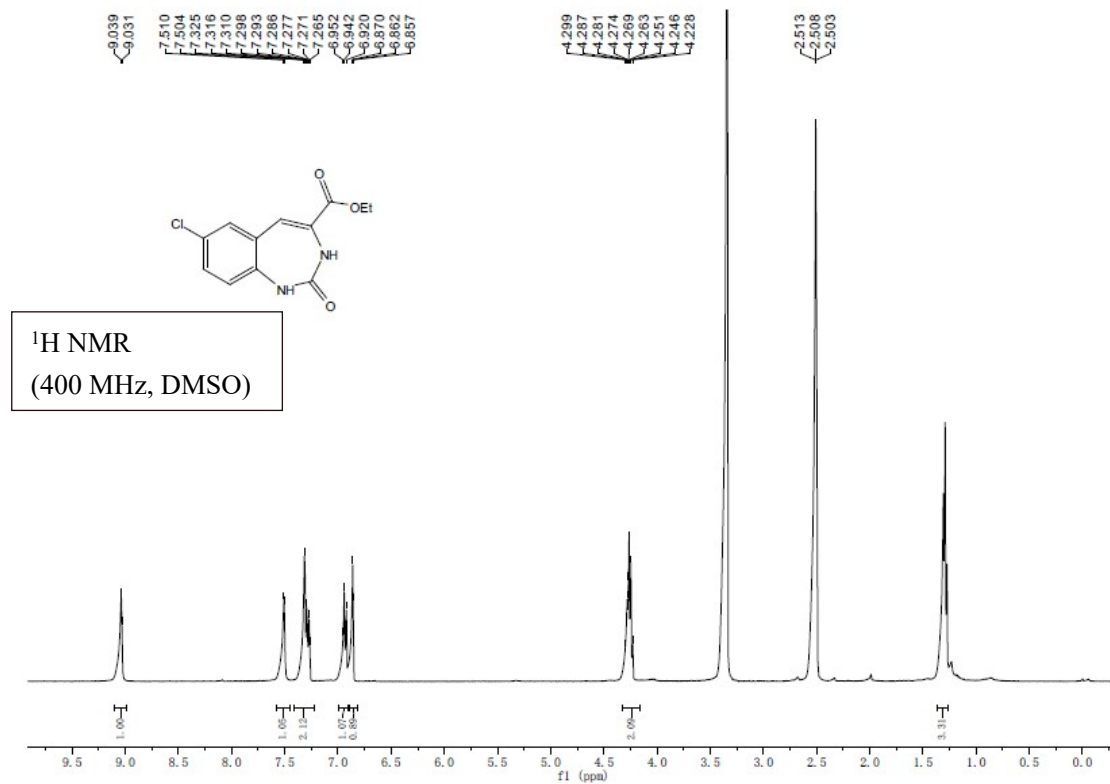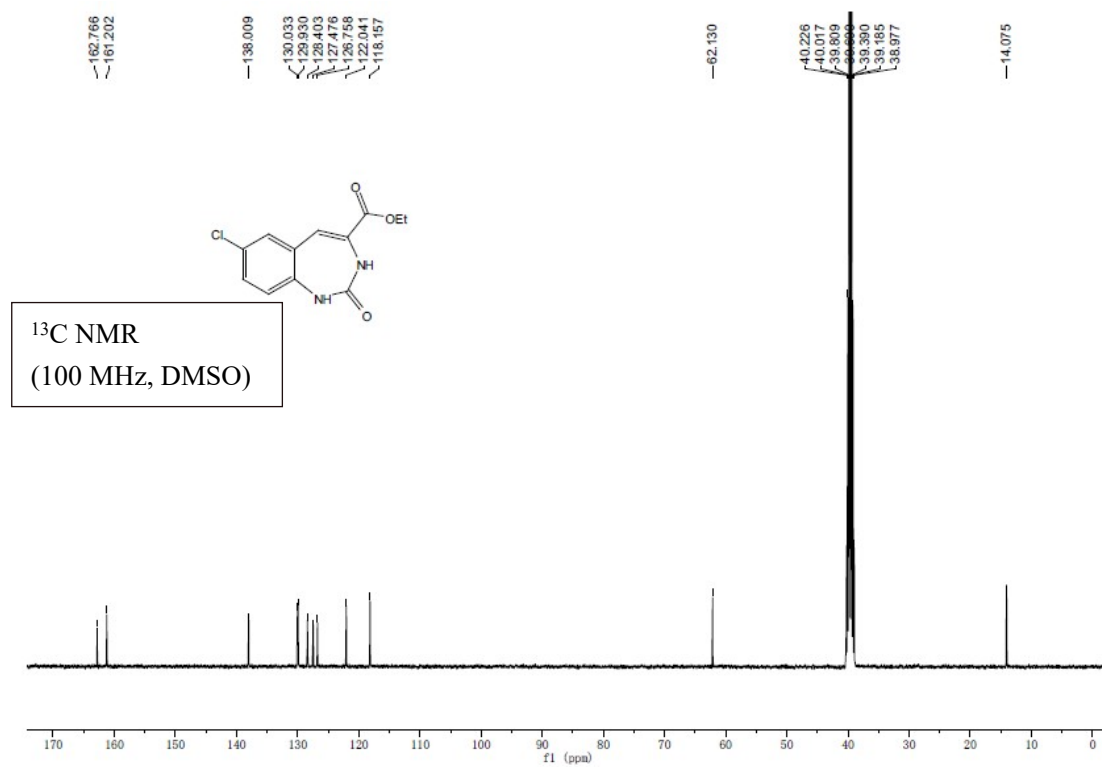

(3d)

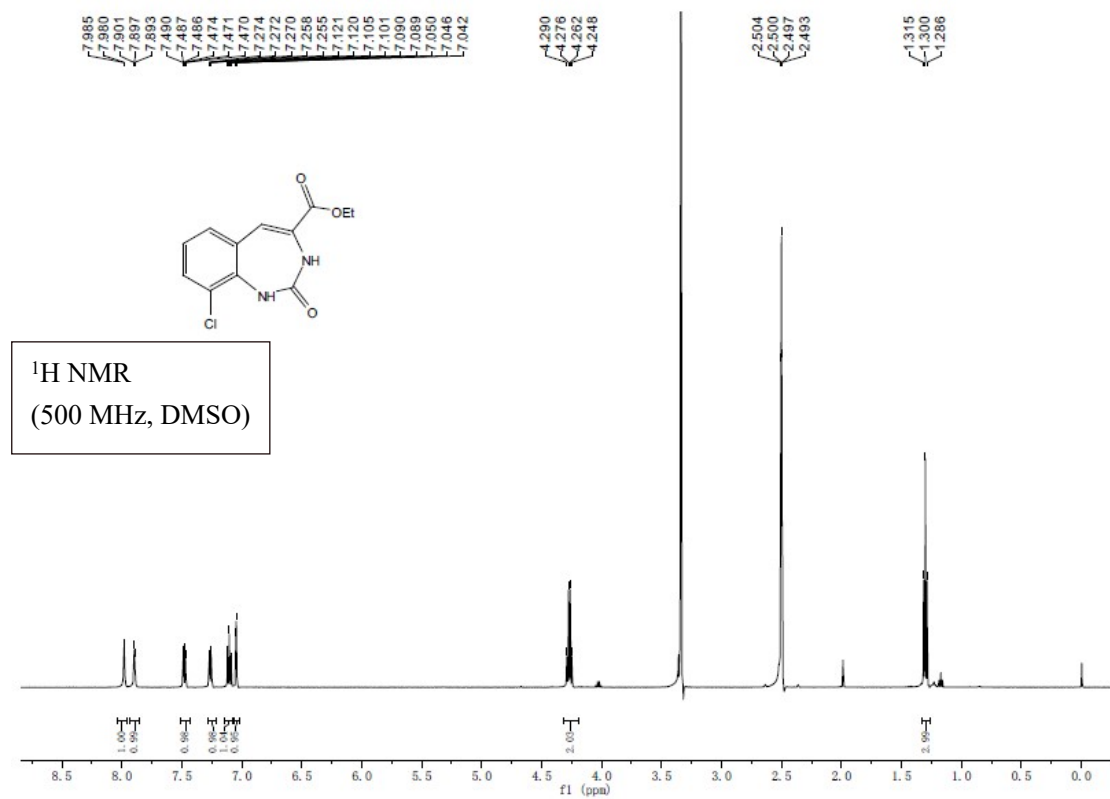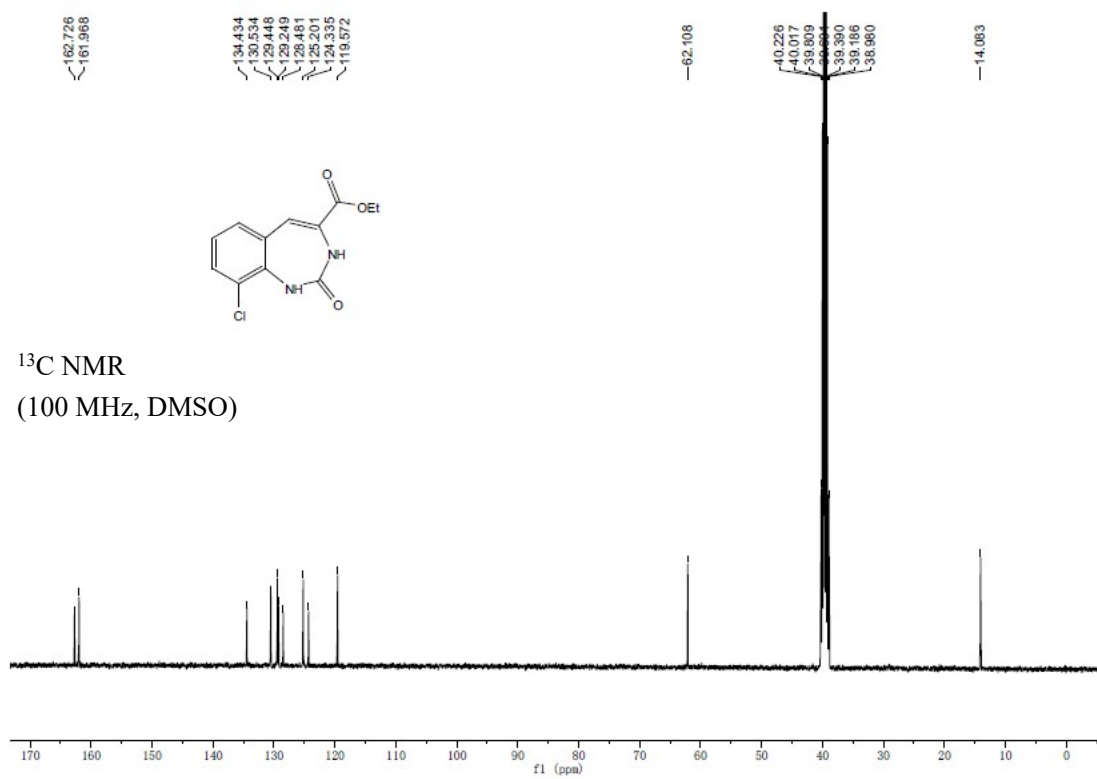

(3e)

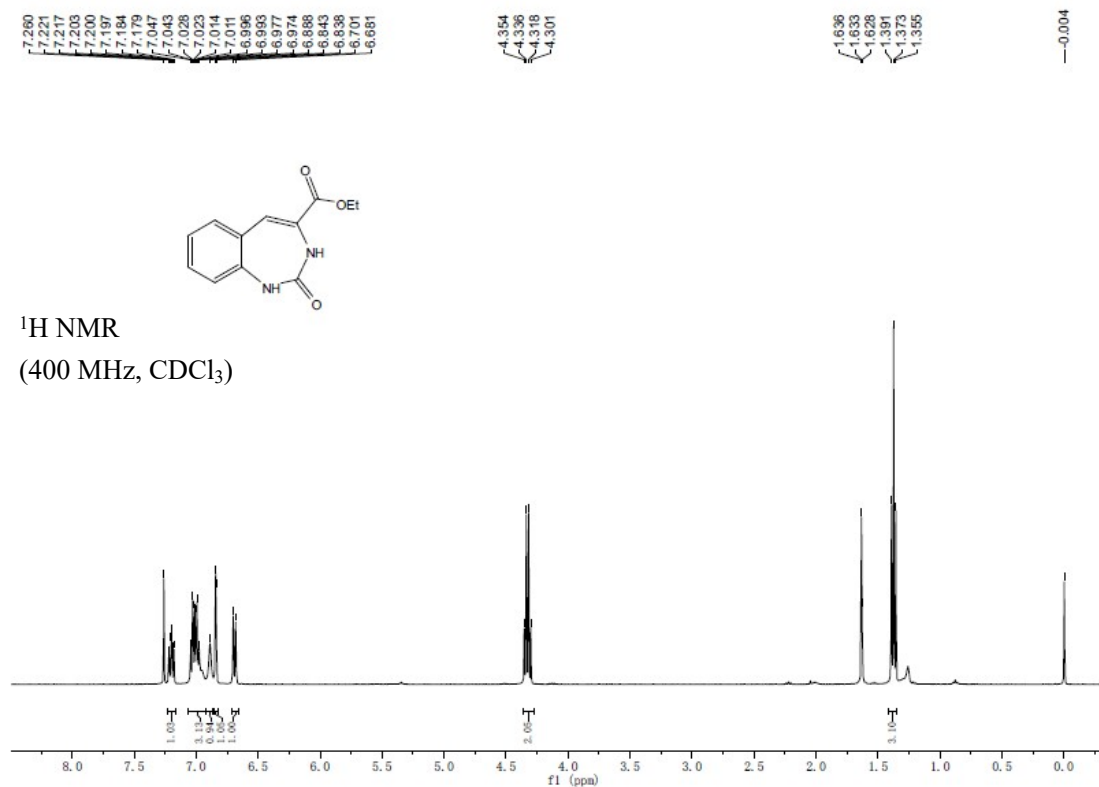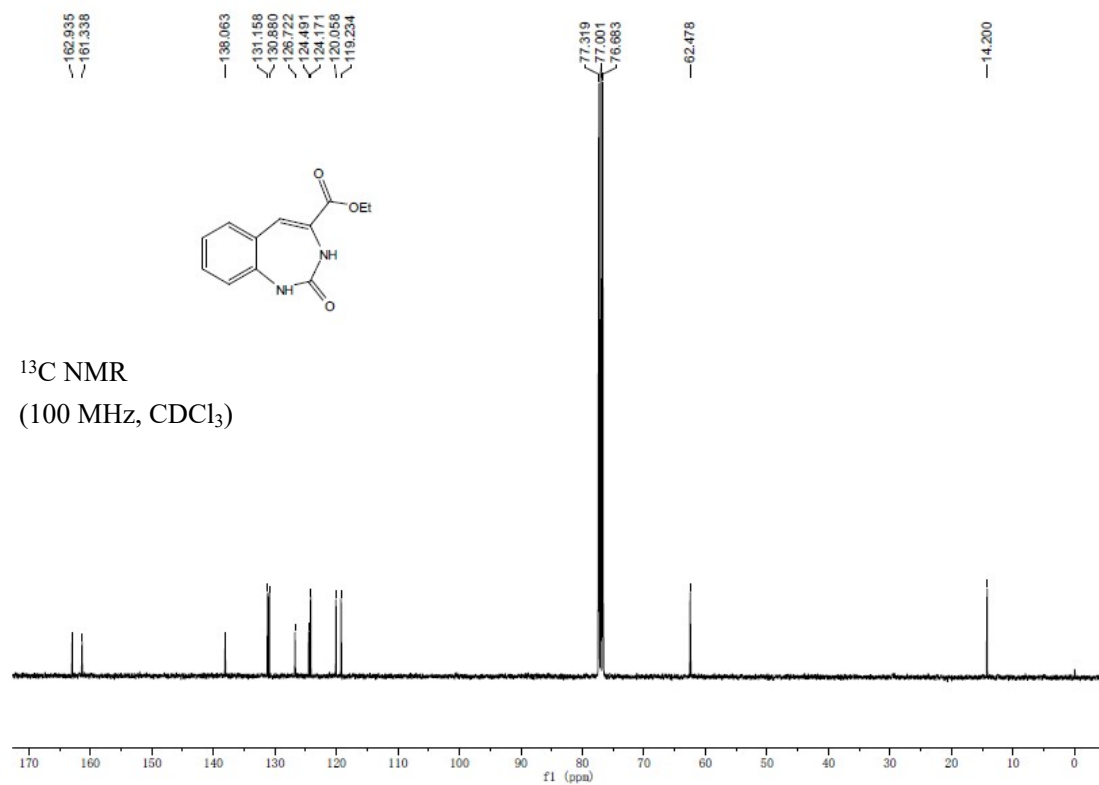



(3f)

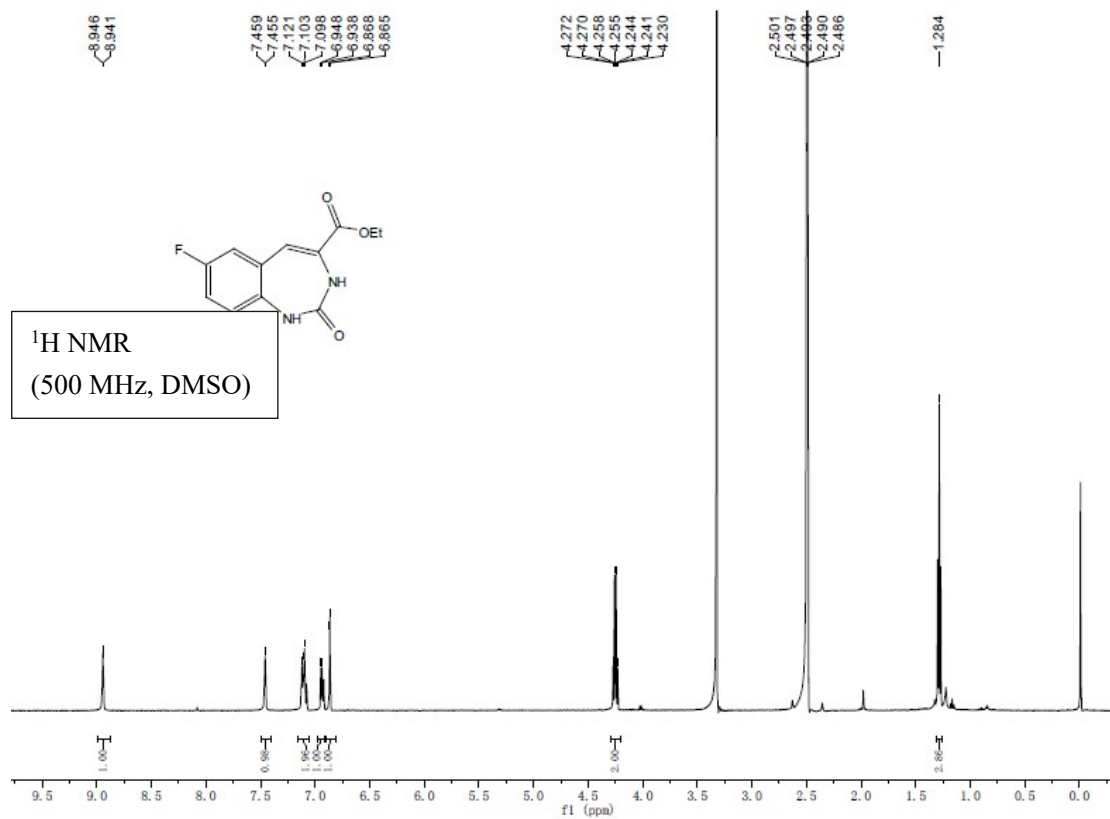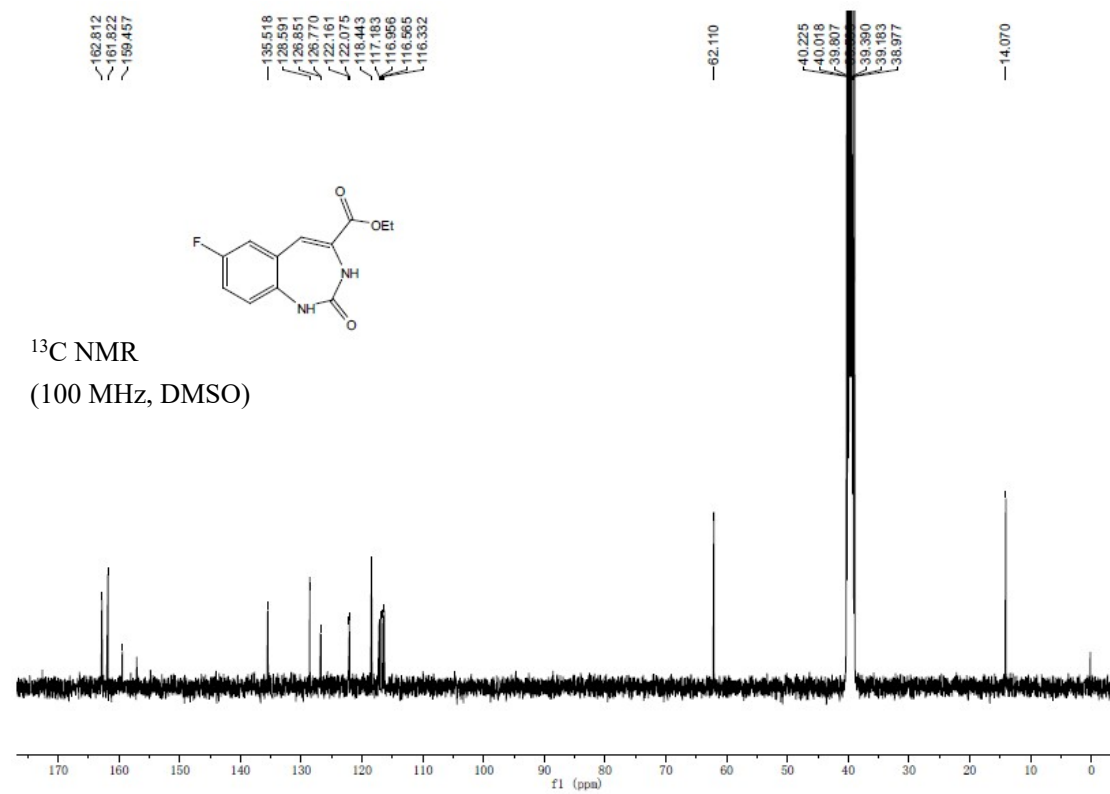

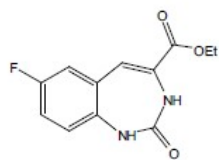

$^{19}\text{F}$  NMR  
(376 MHz, DMSO)

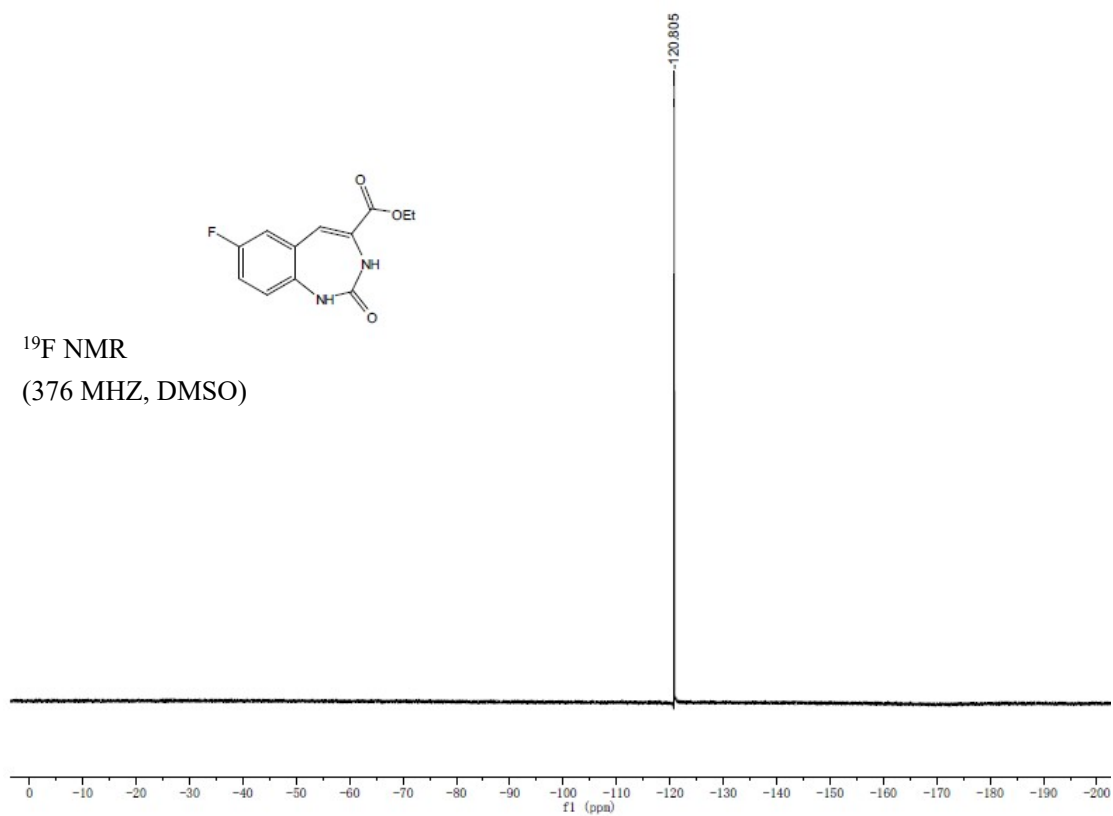

(3d)

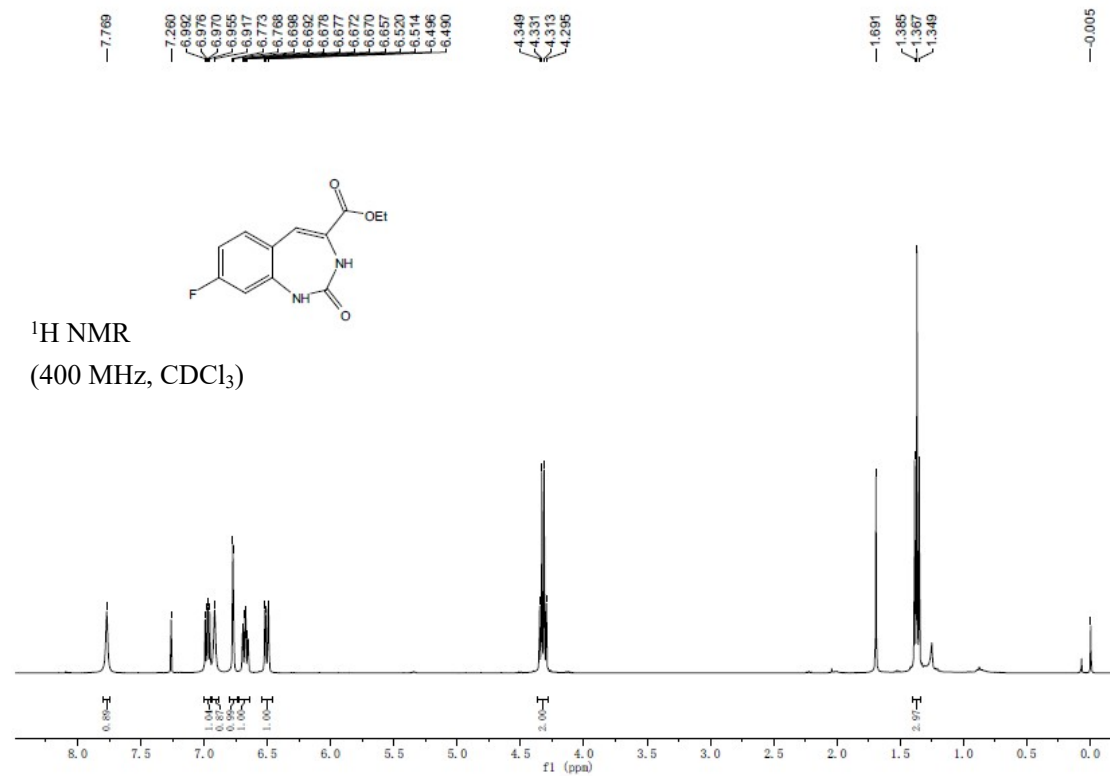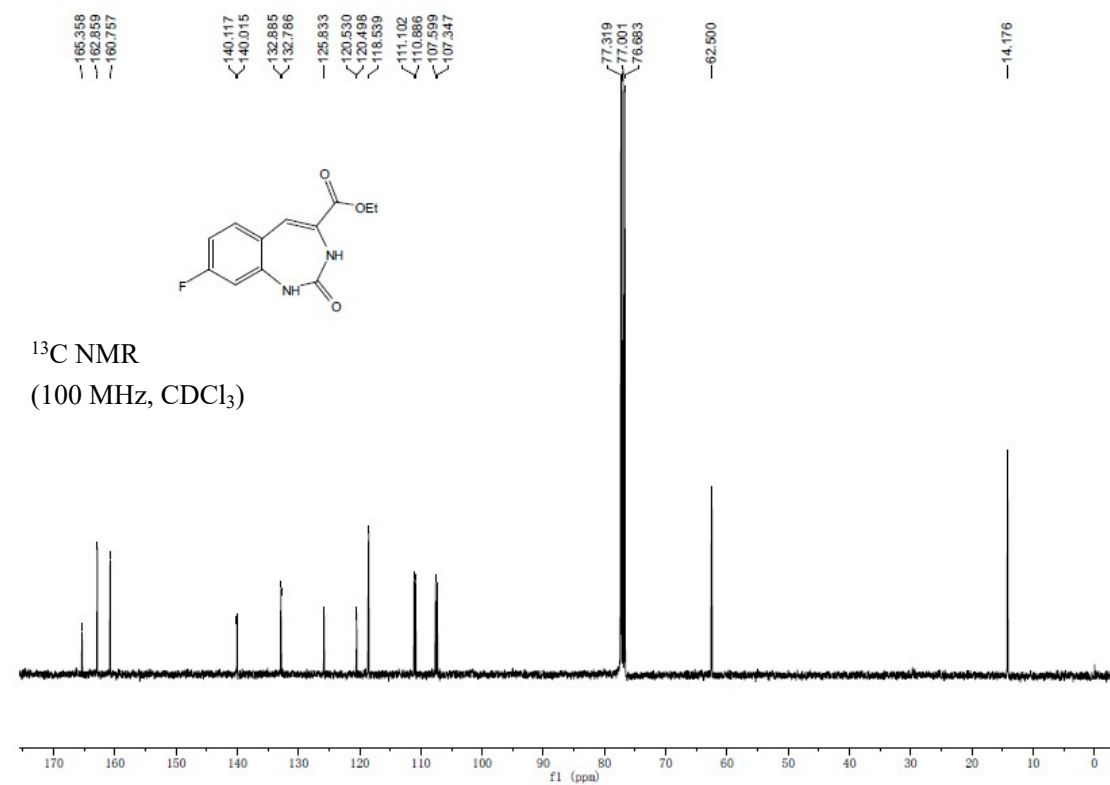

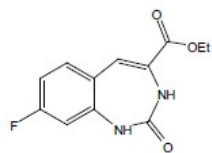

$^{19}\text{F}$  NMR  
(376 MHz,  $\text{CDCl}_3$ )

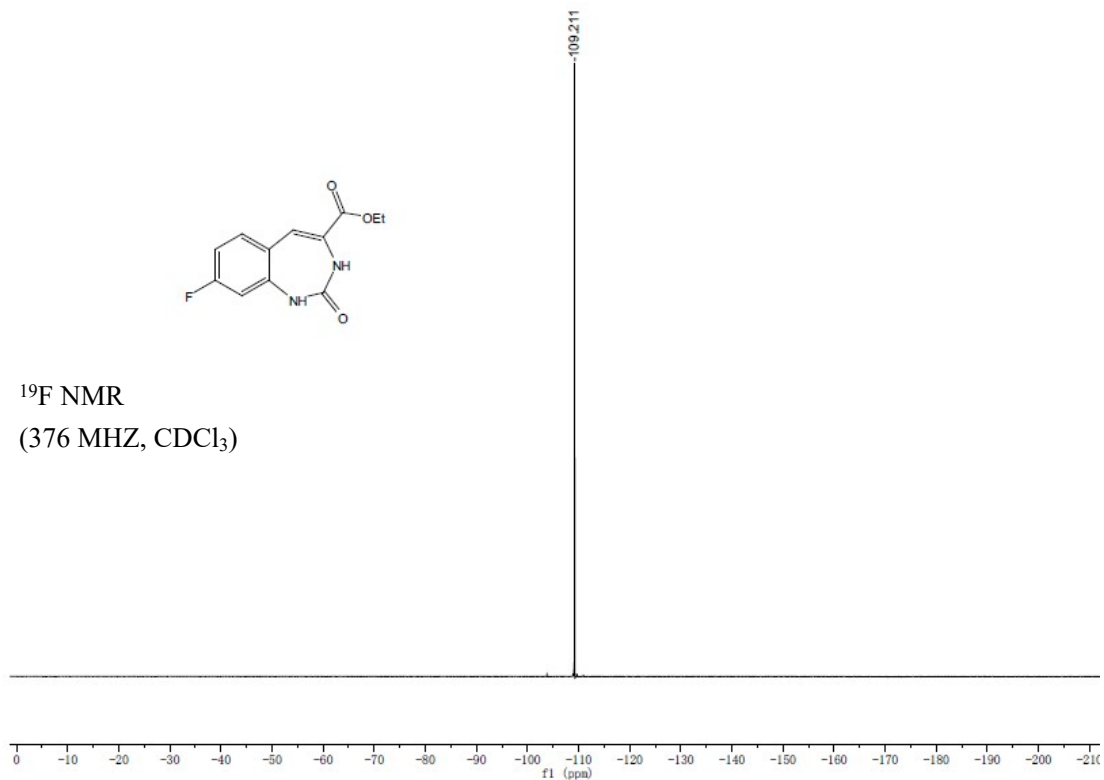

(3h)

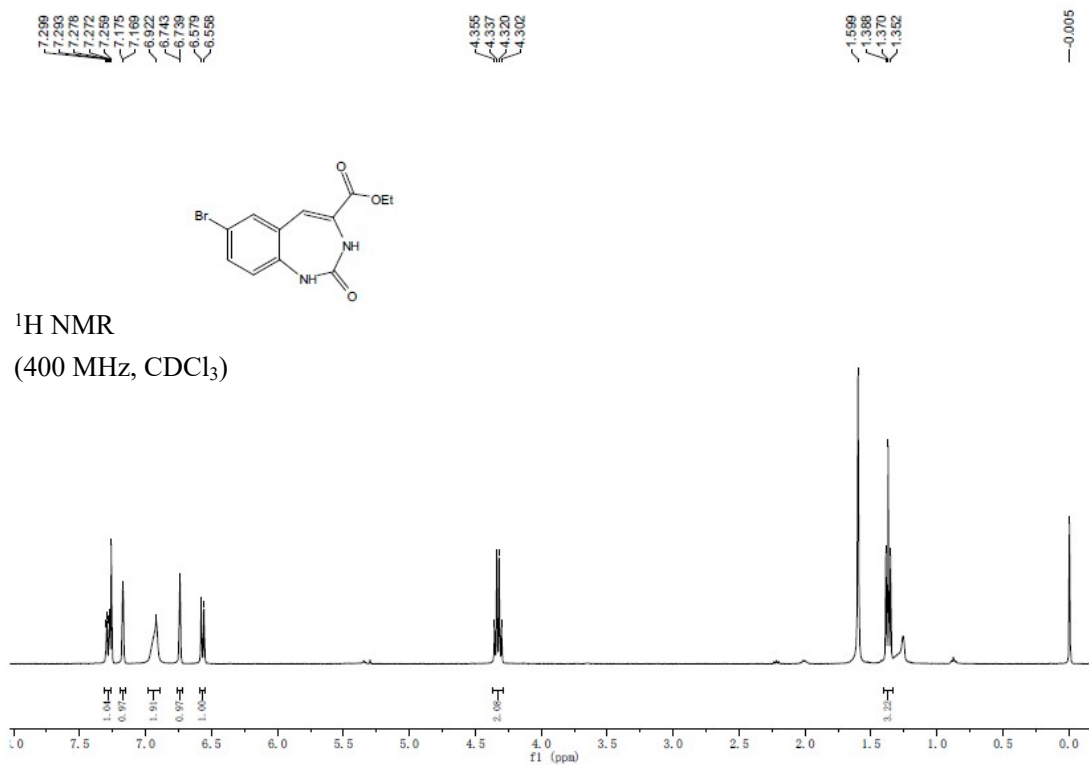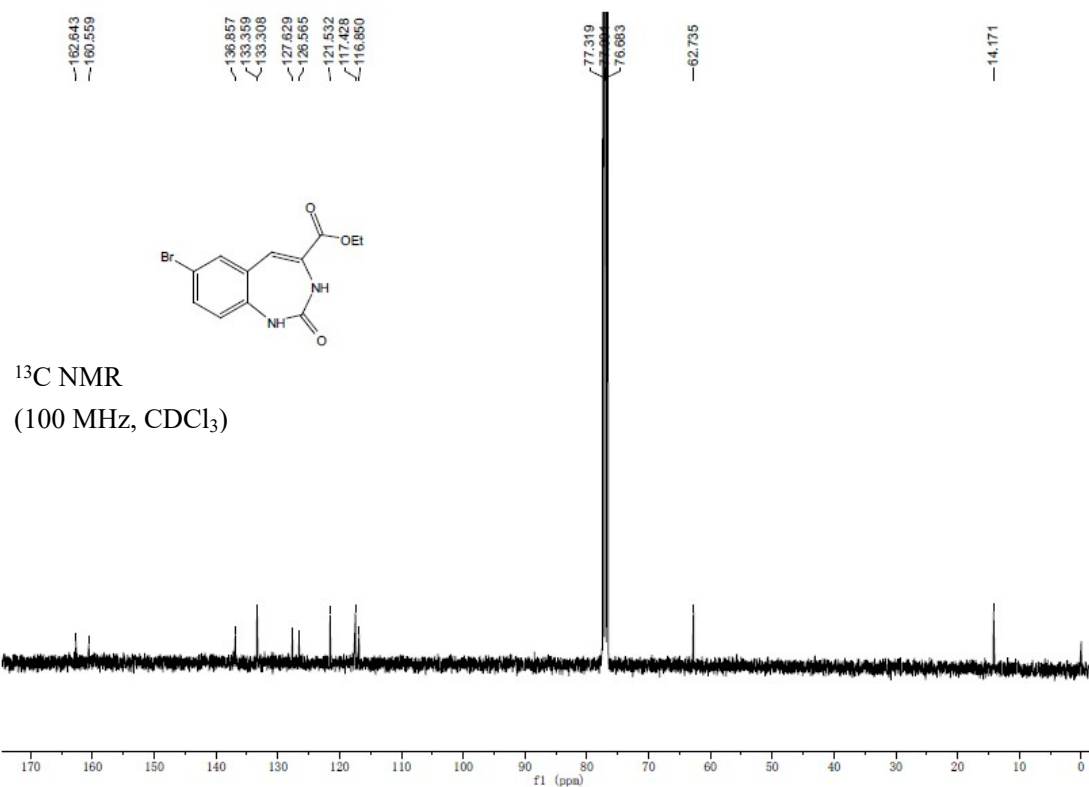

(3i)

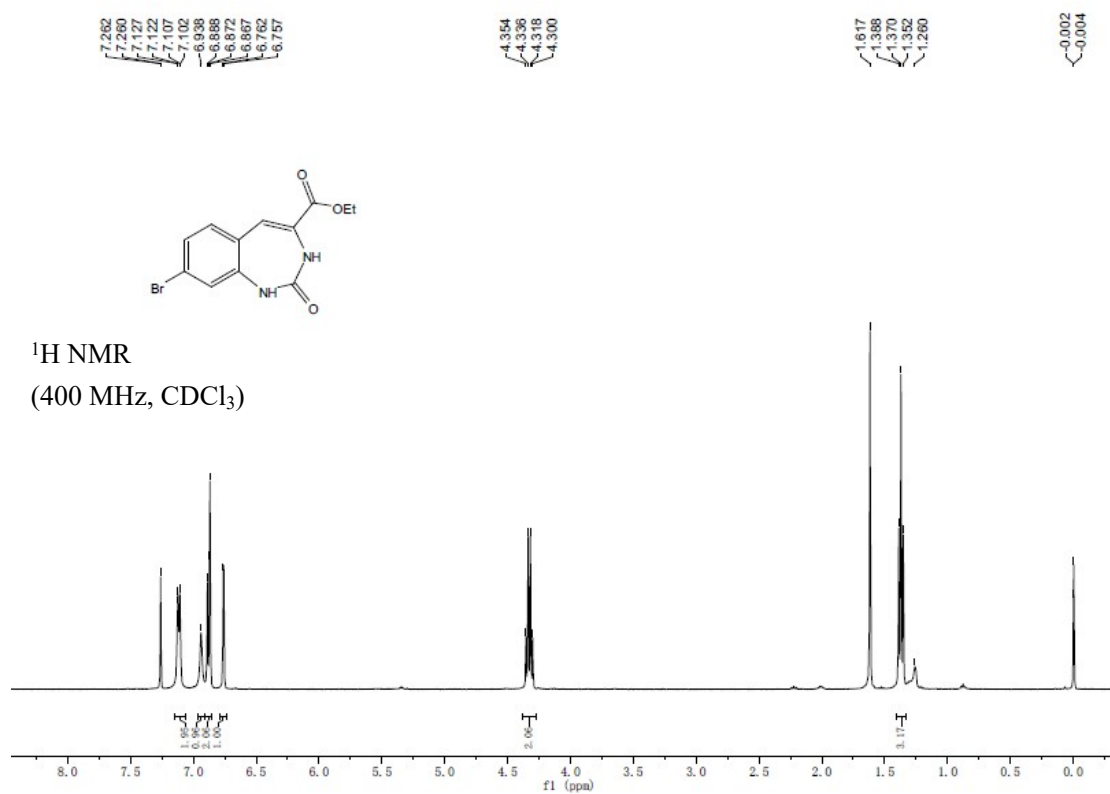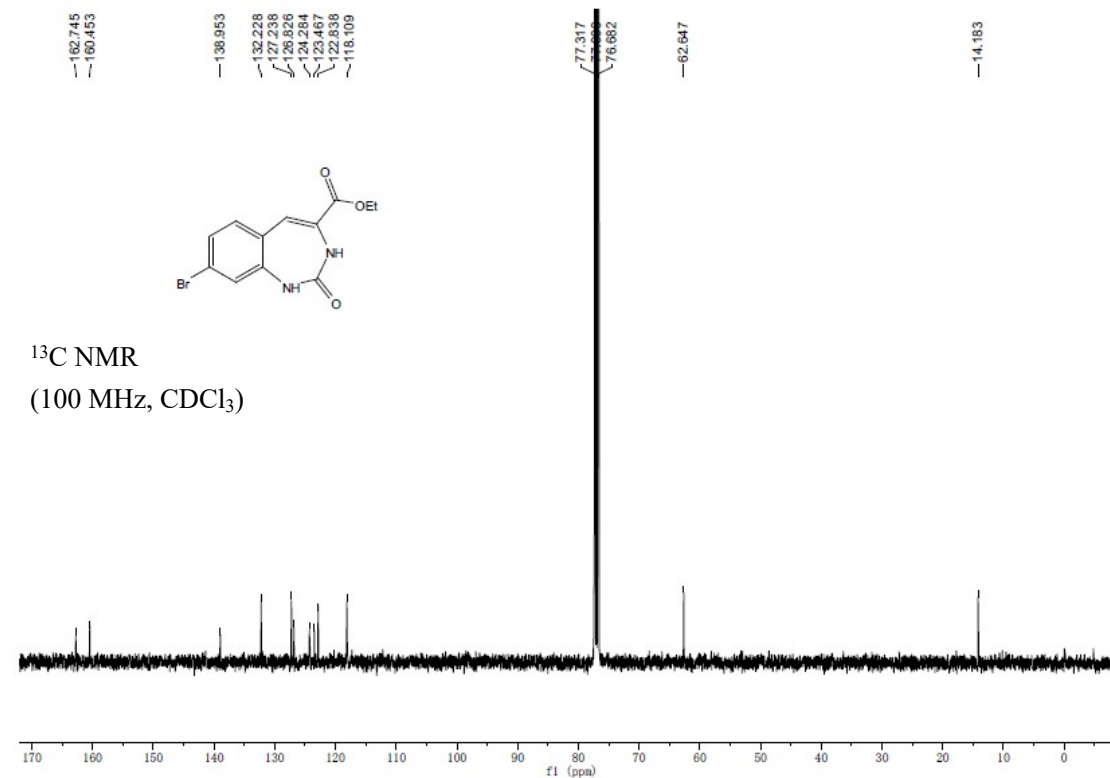

(3j)

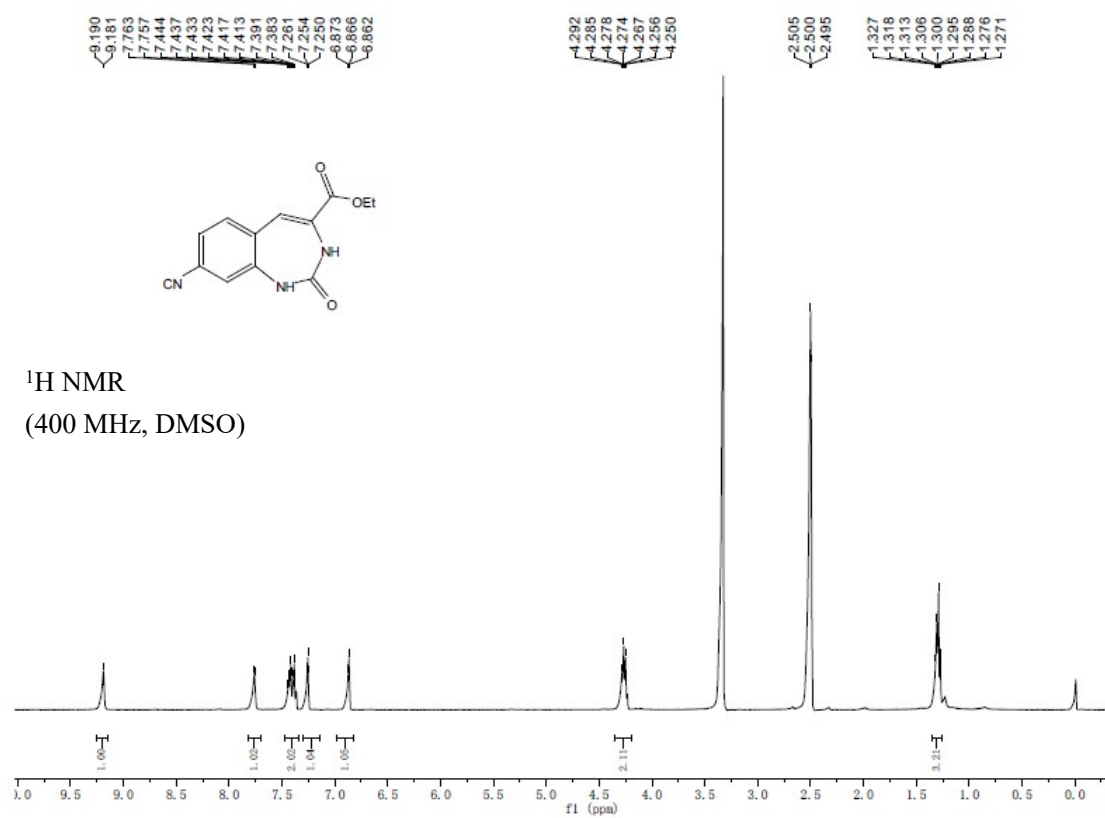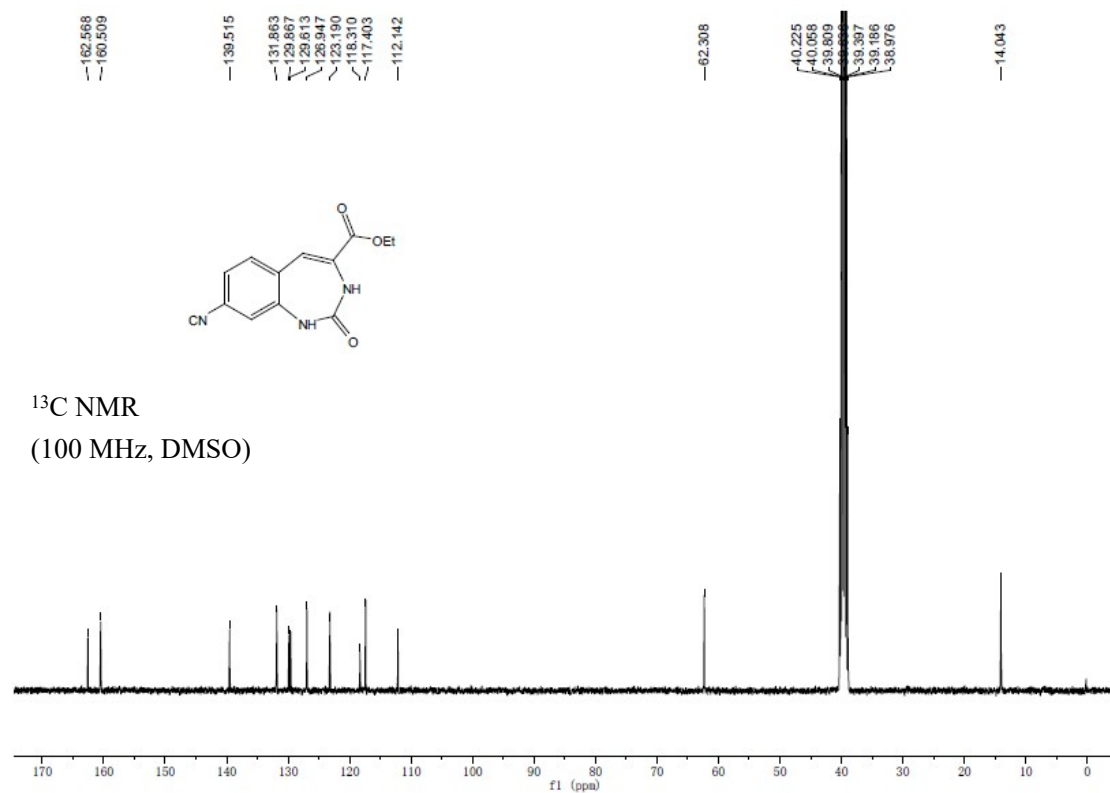

(3k)

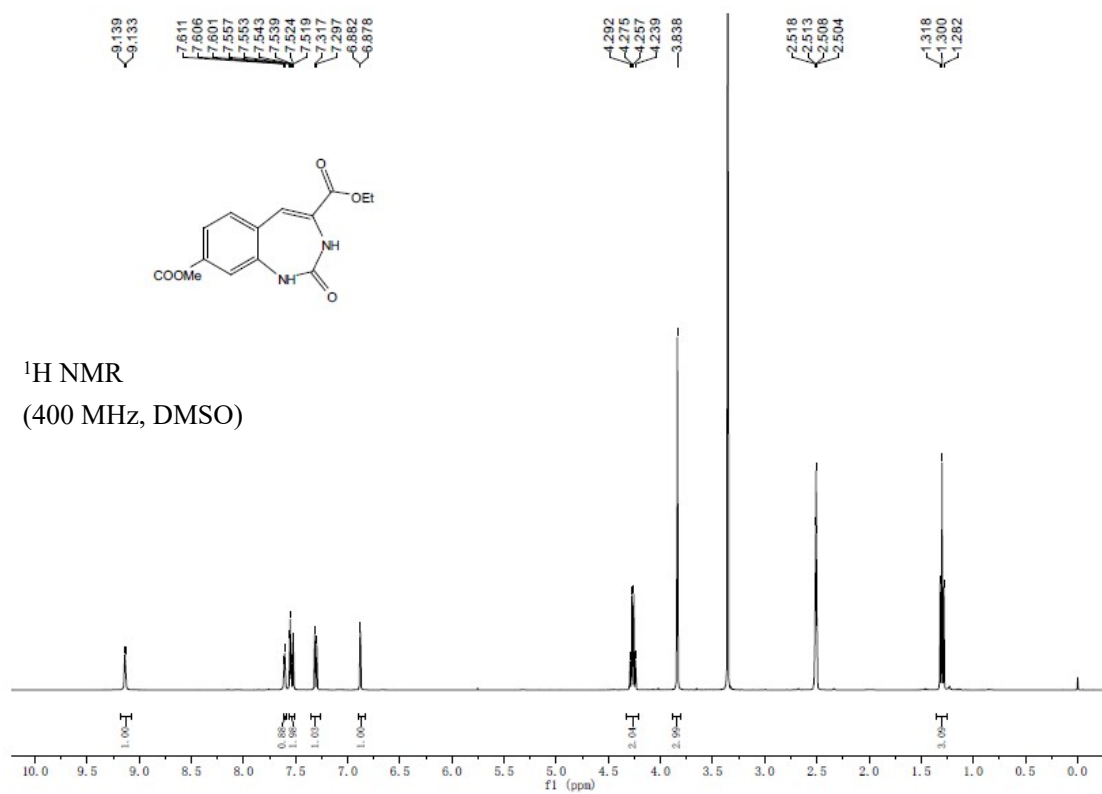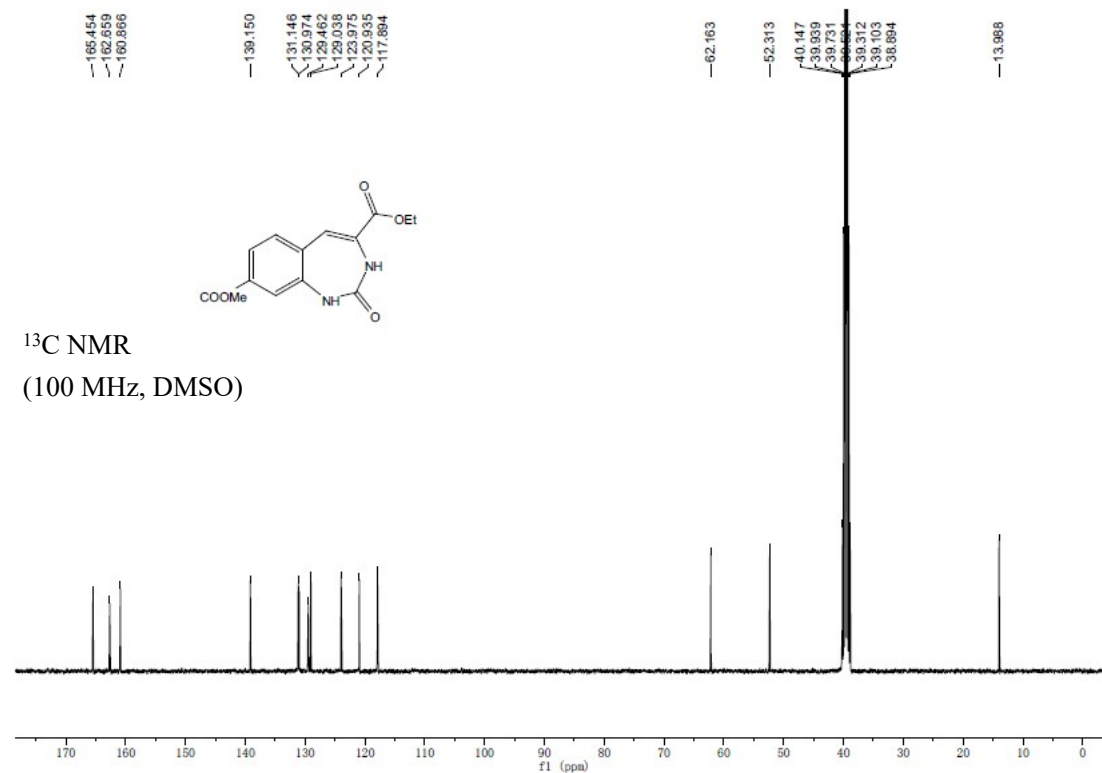



(3)

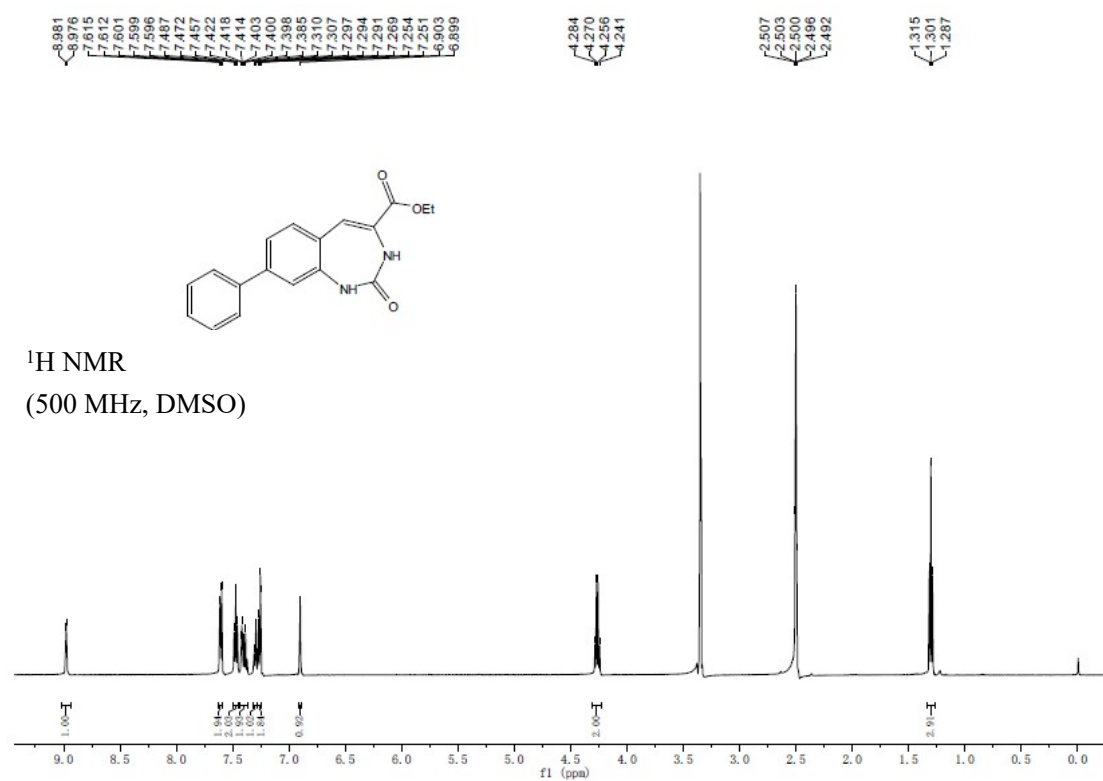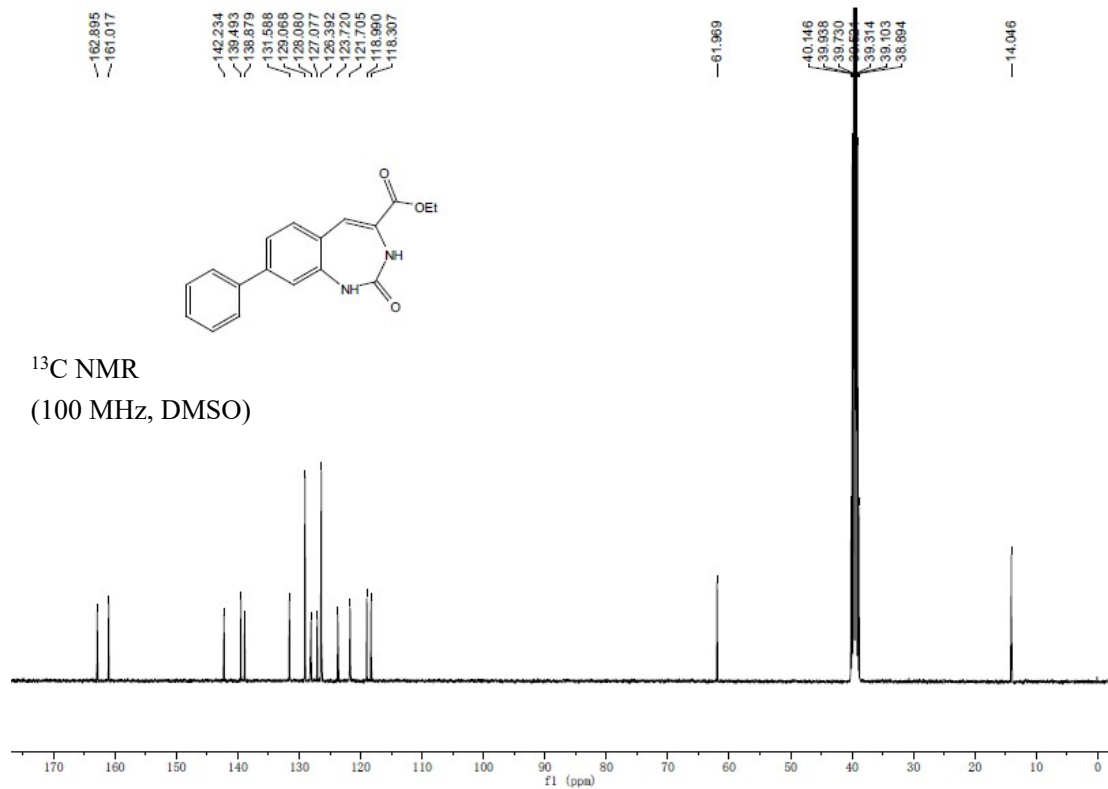

(3m)

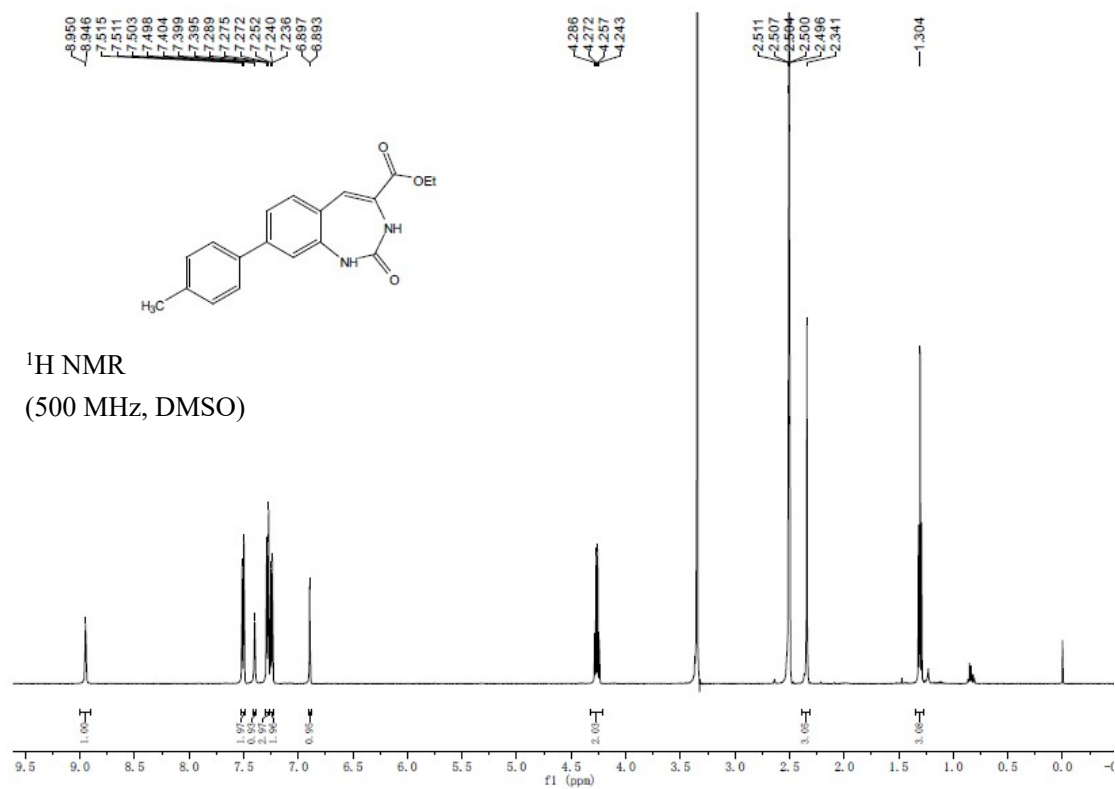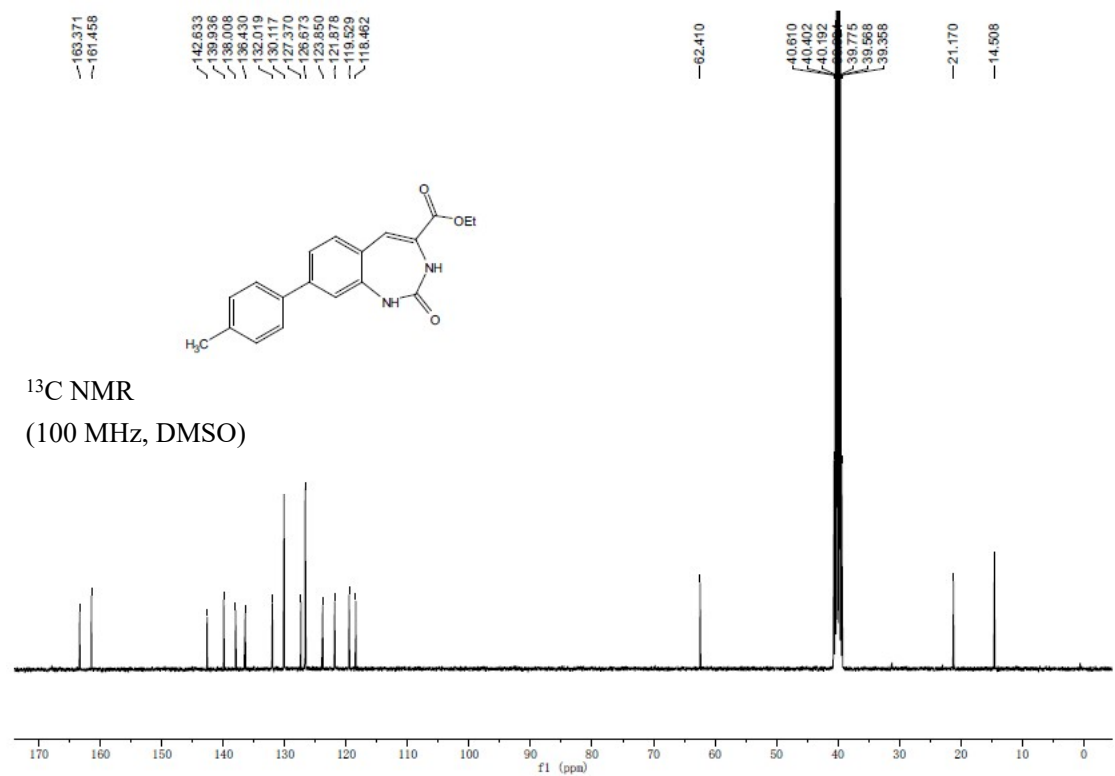

**(3n)**

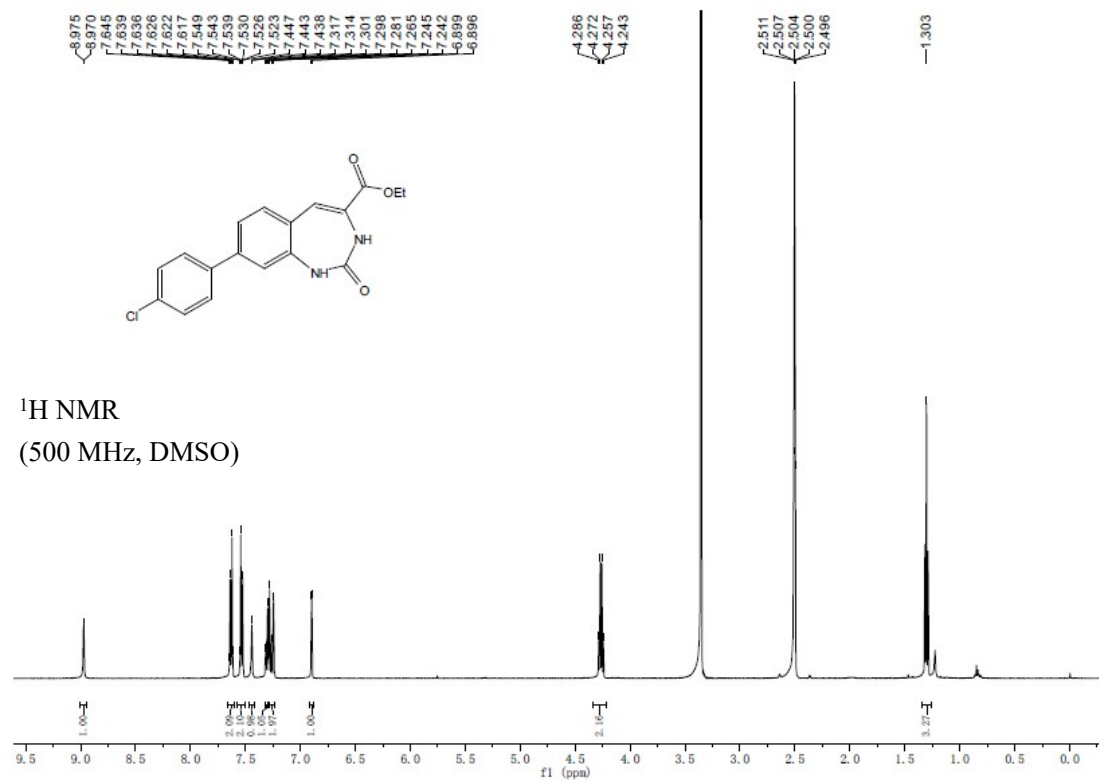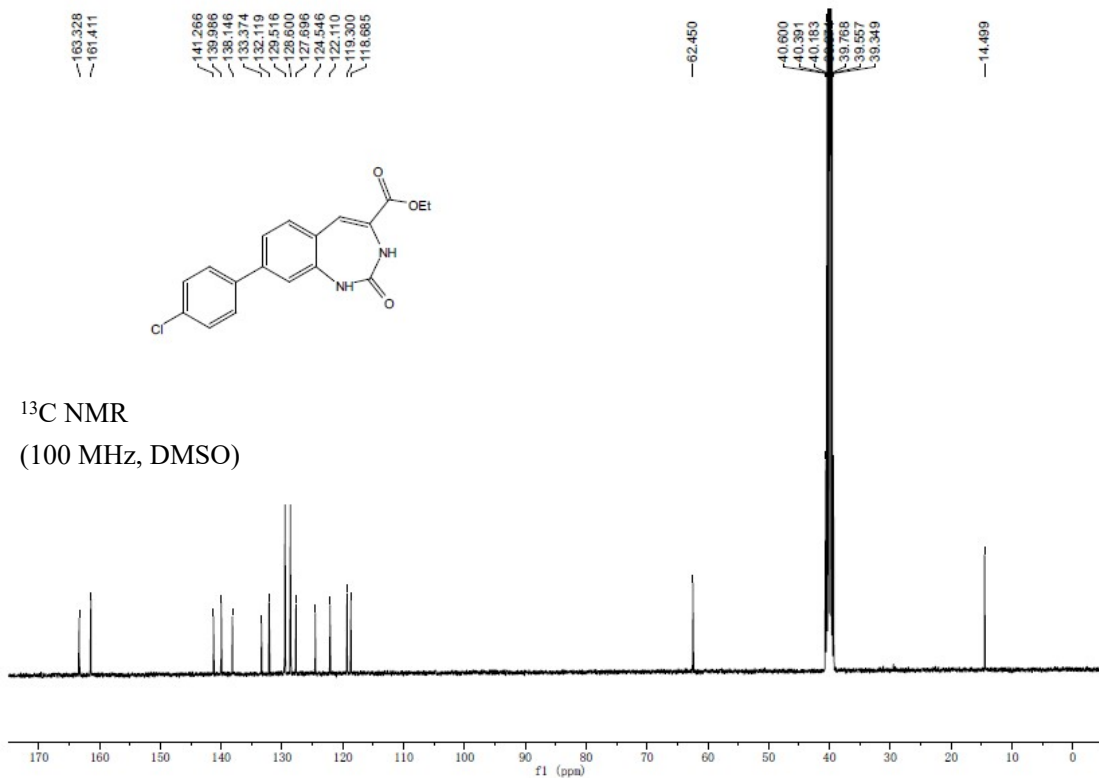

(30)

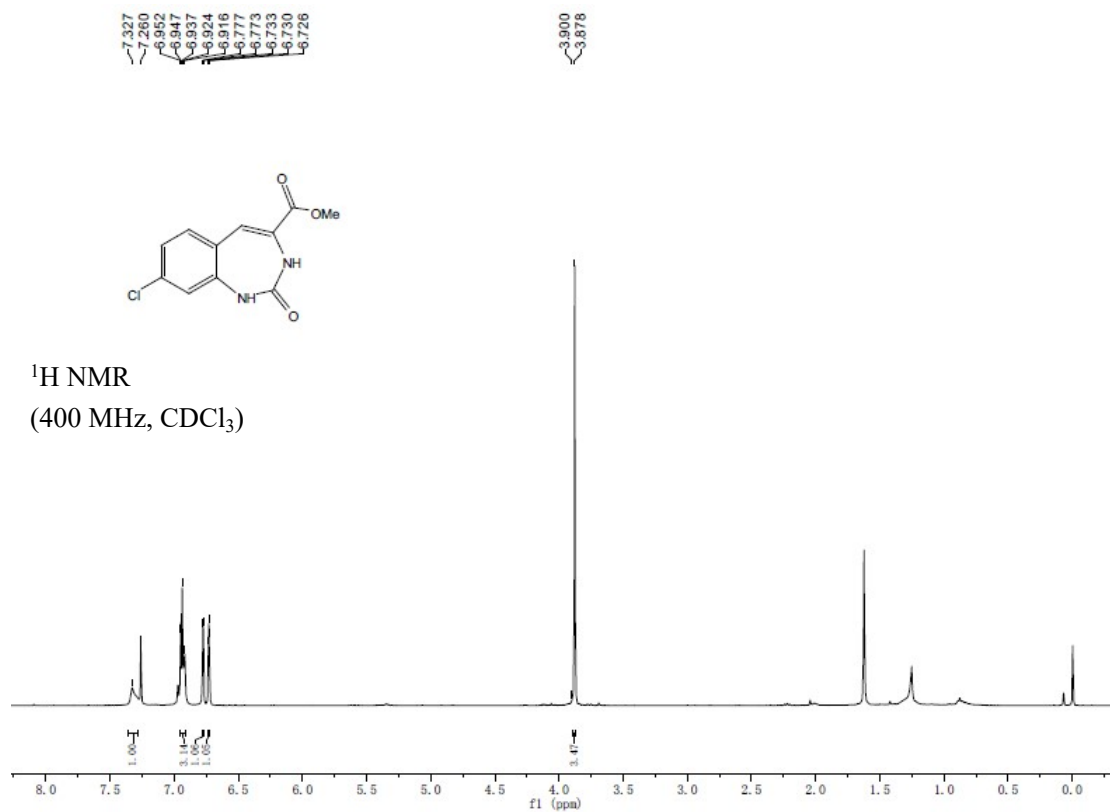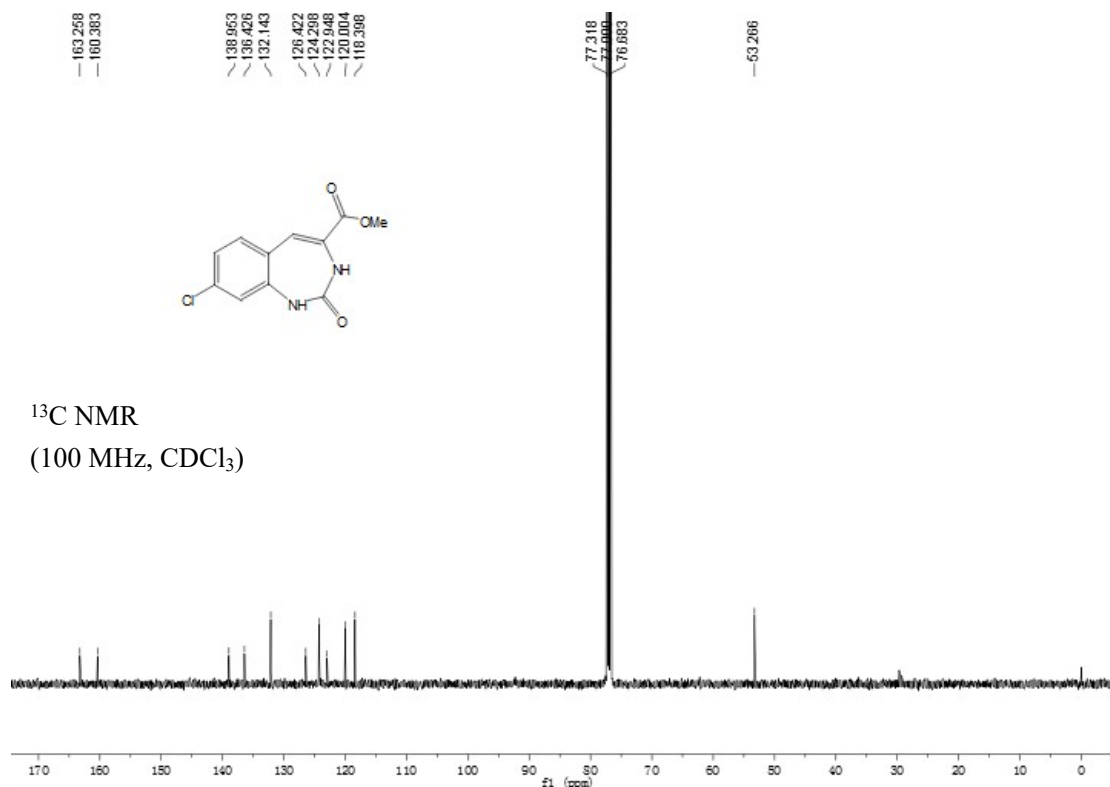

(3p)

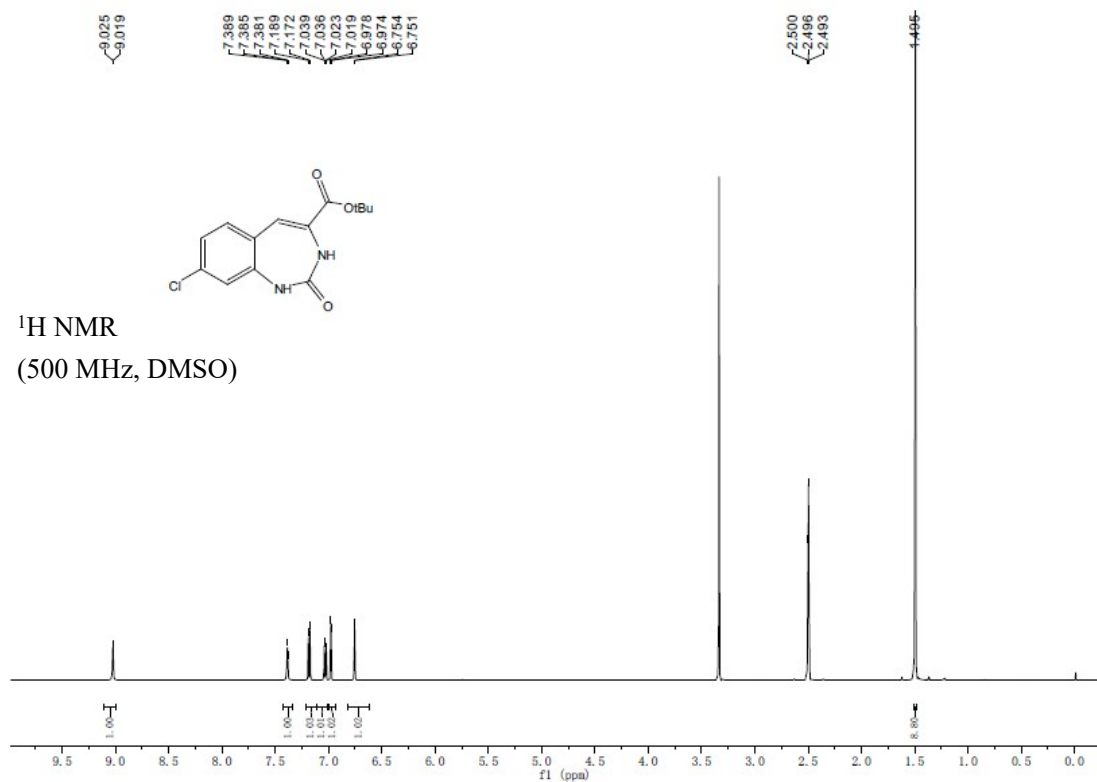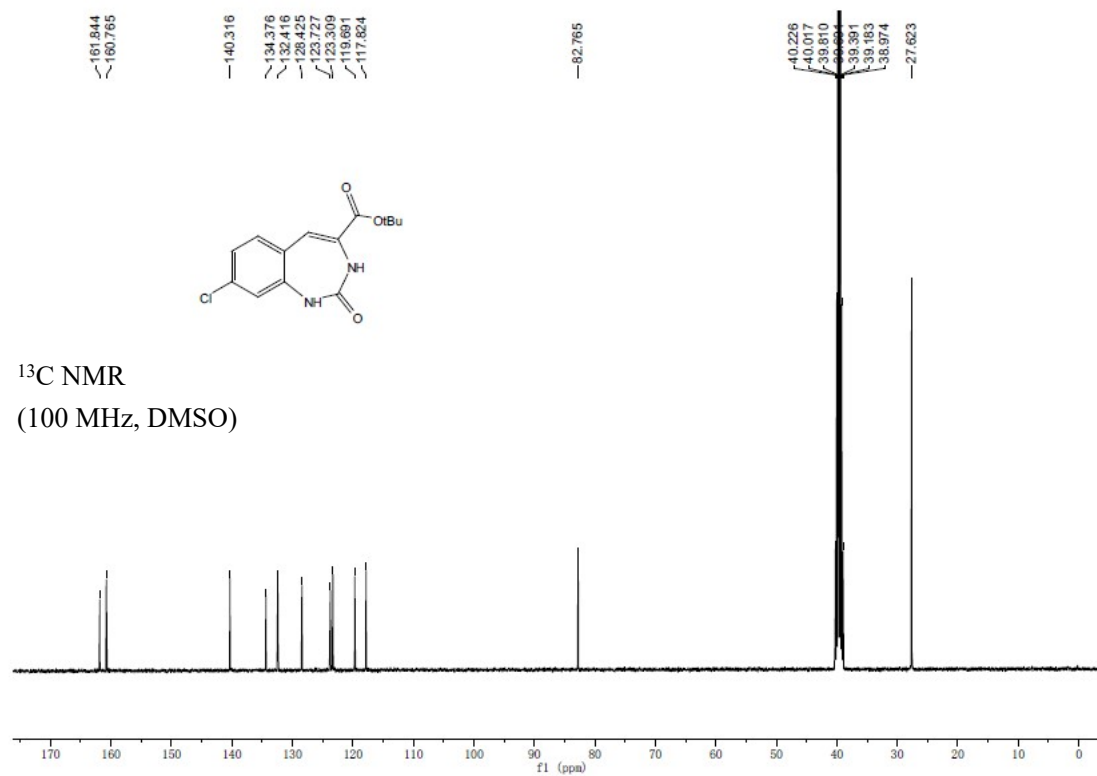

(3q)

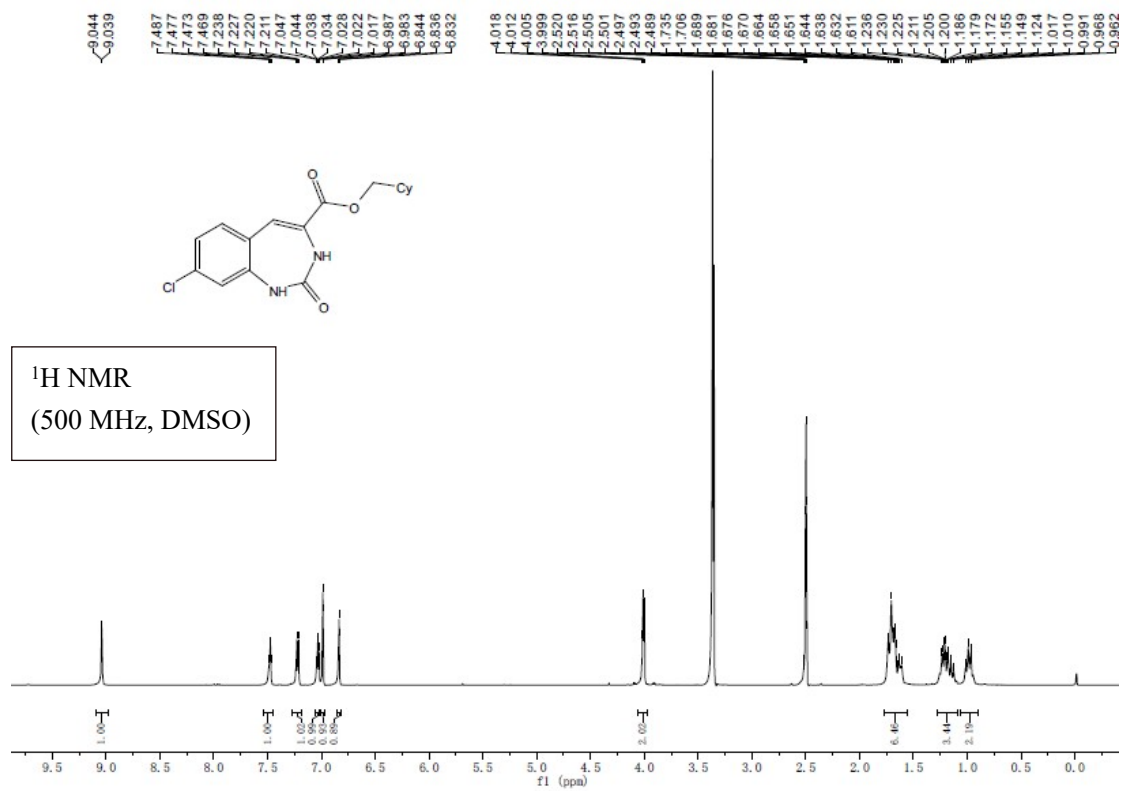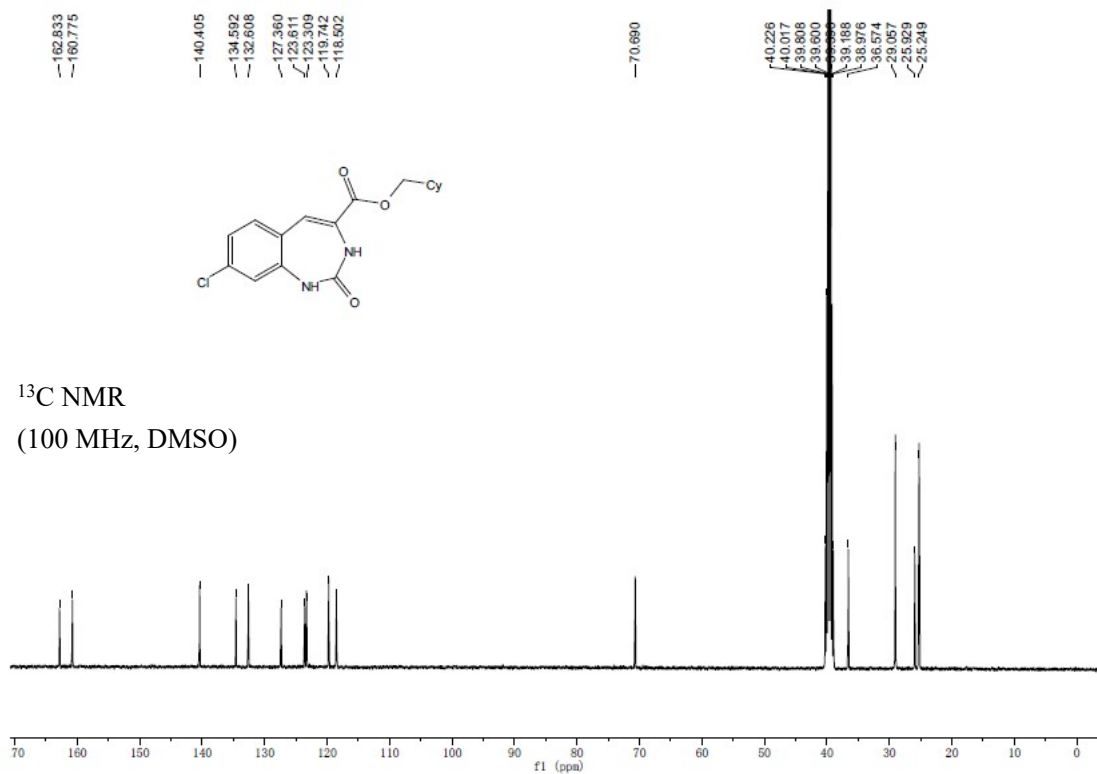

(3r)

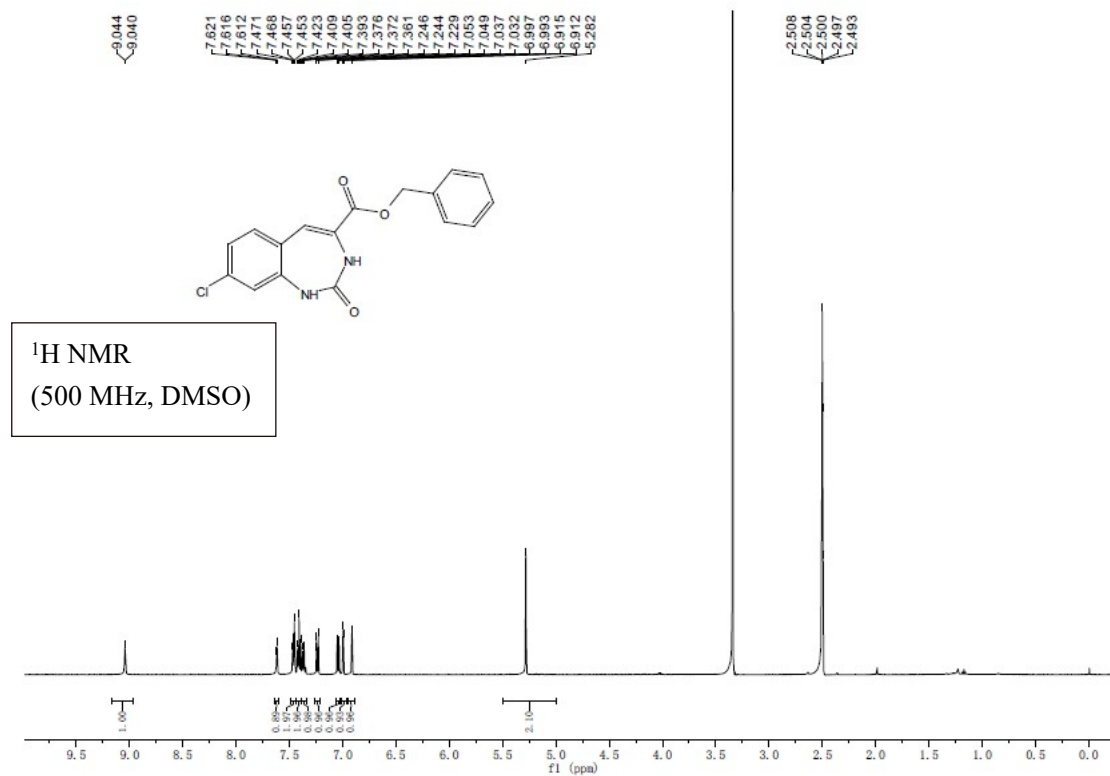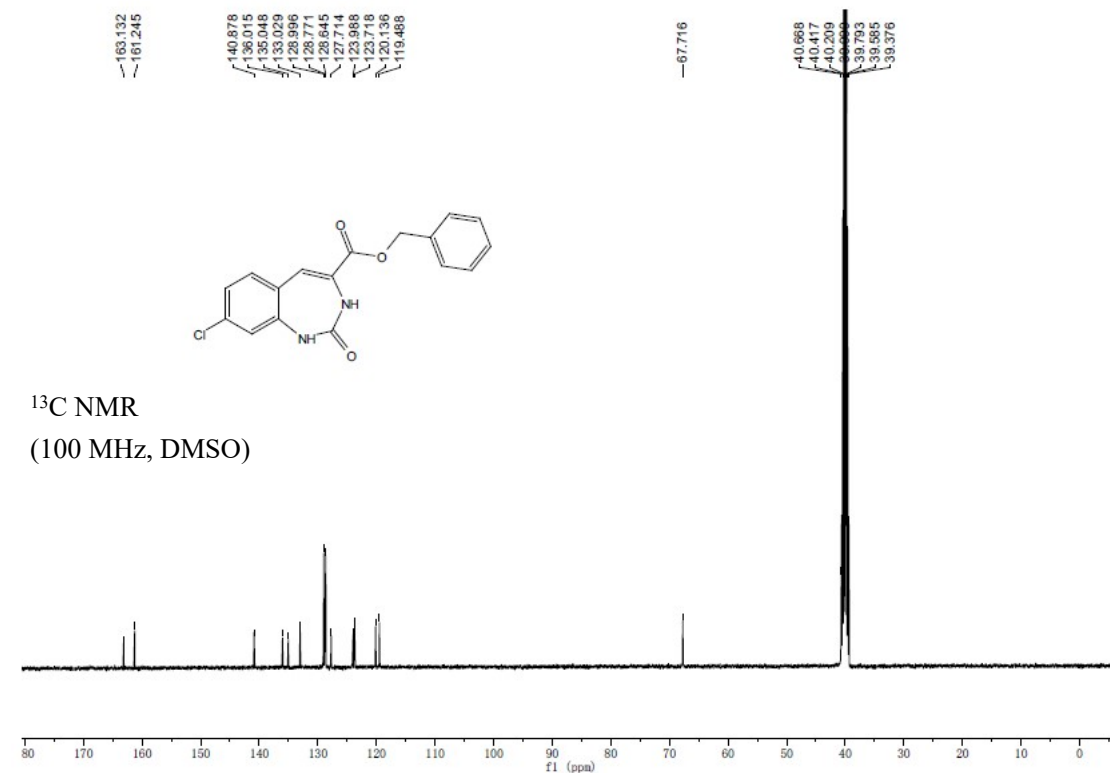

(3s)

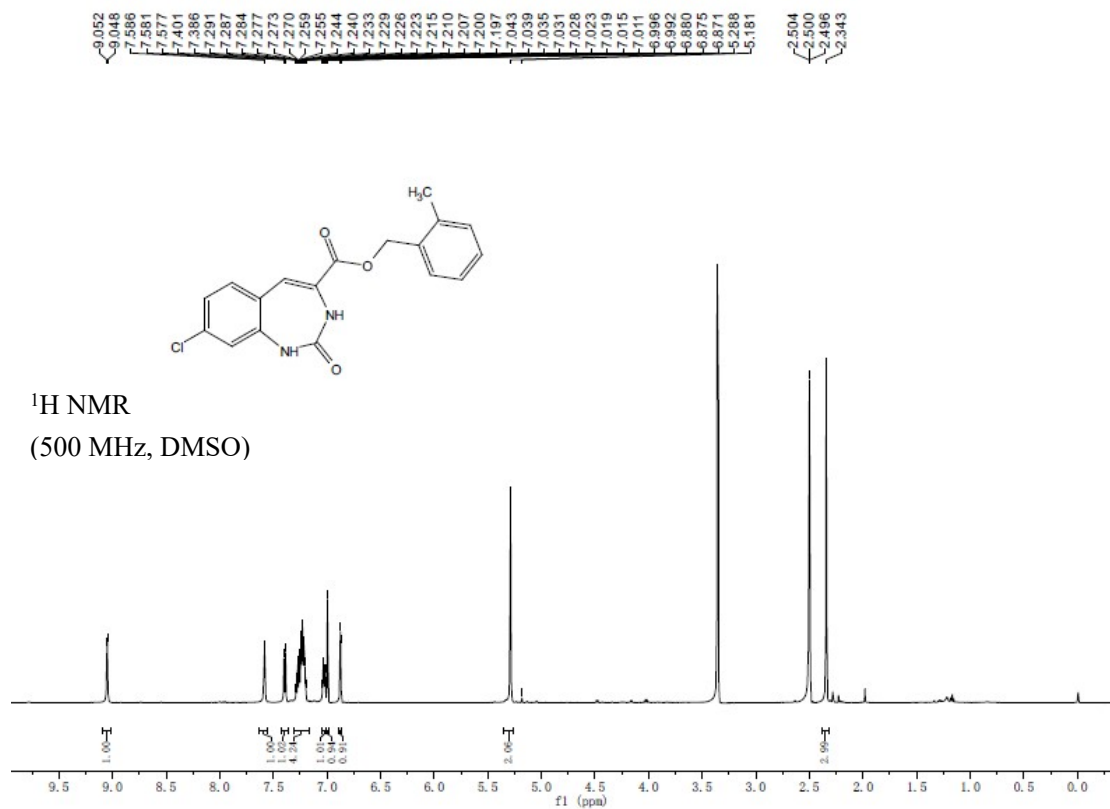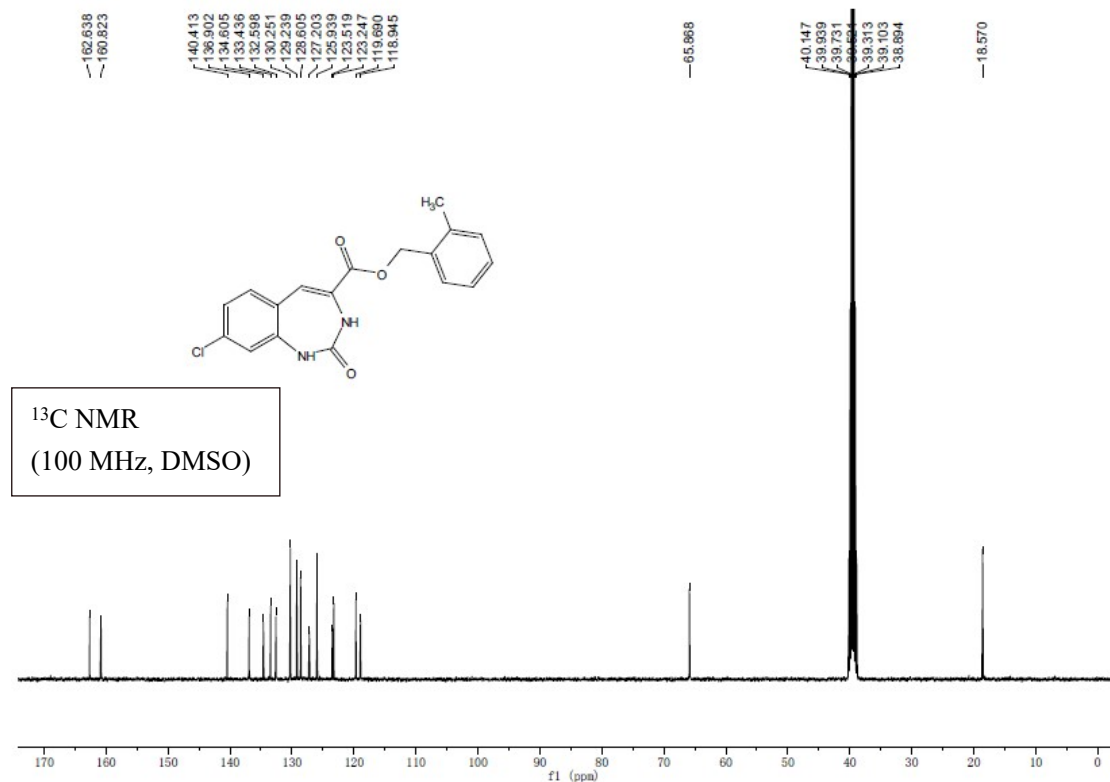



(3t)

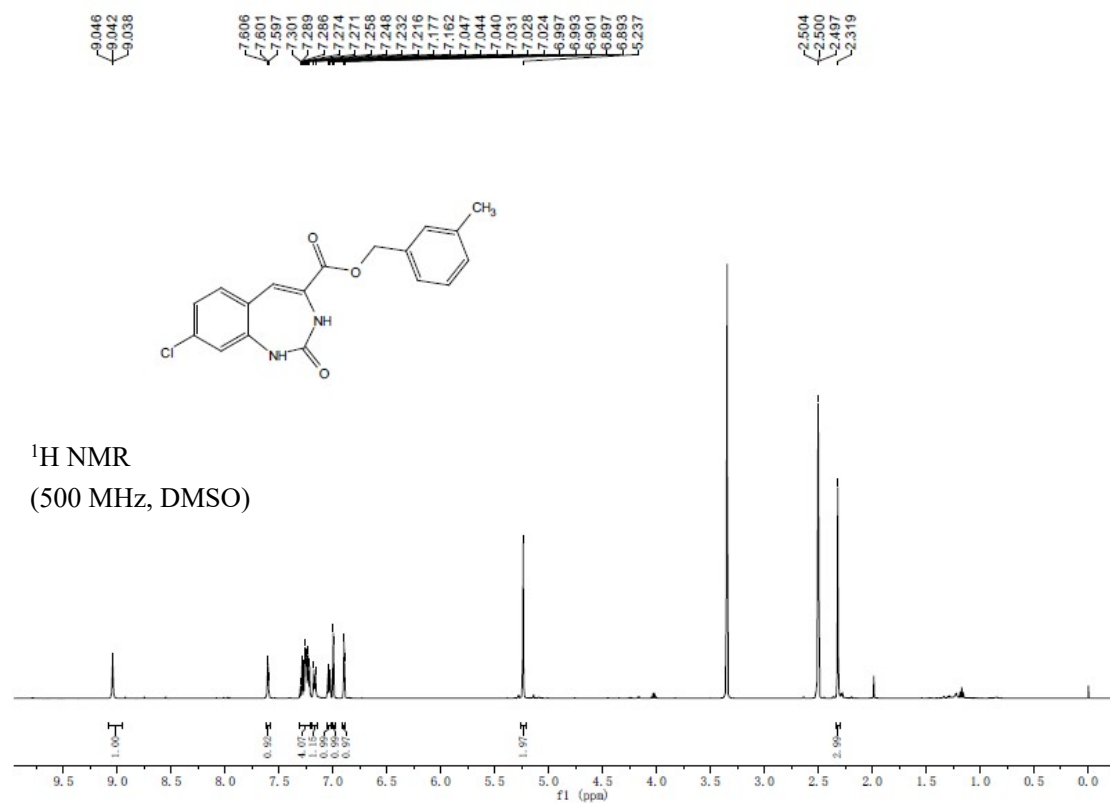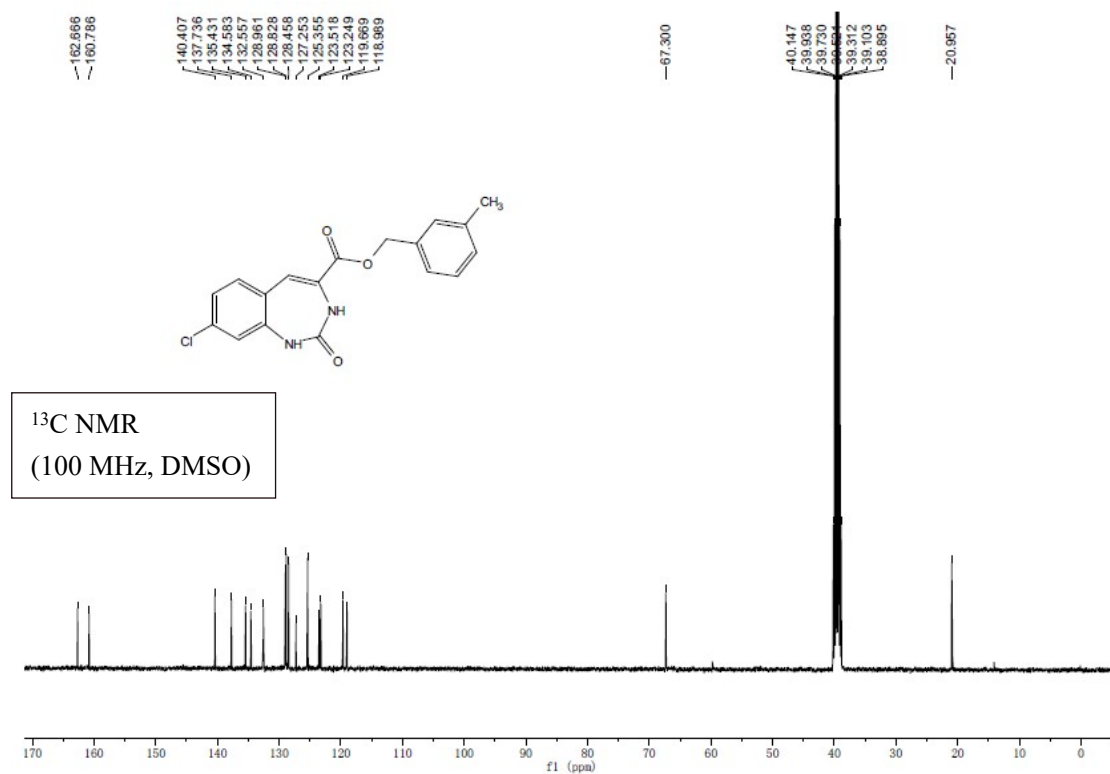

(3u)

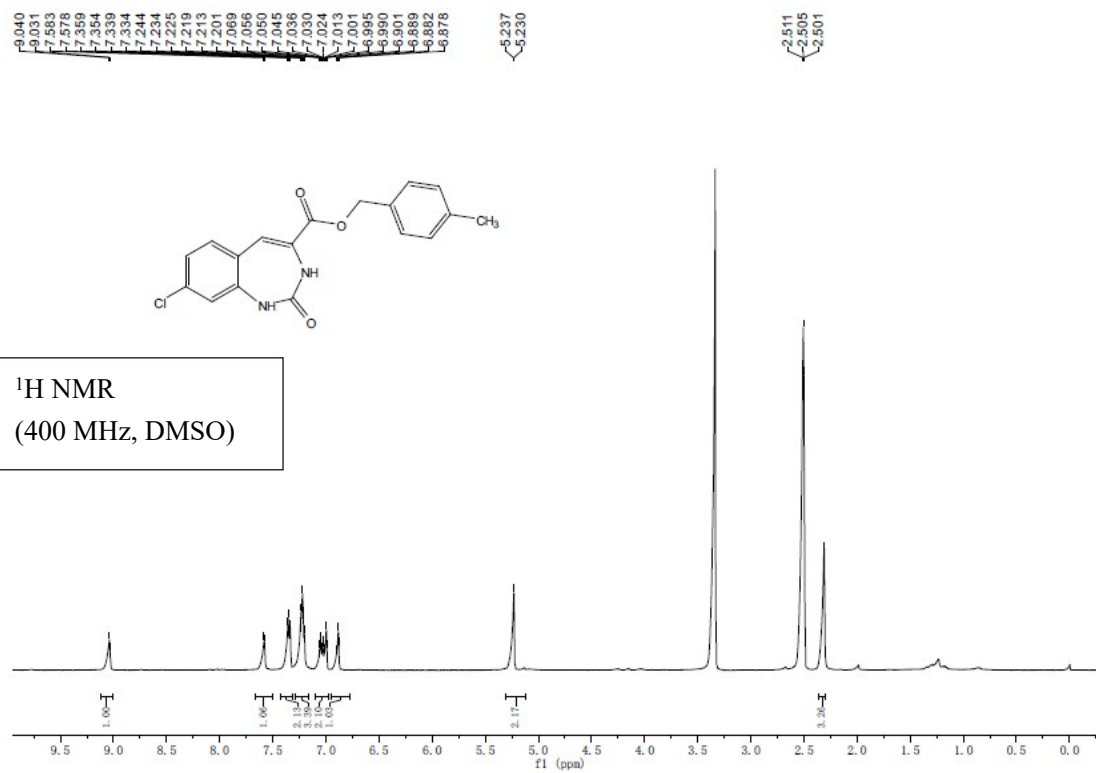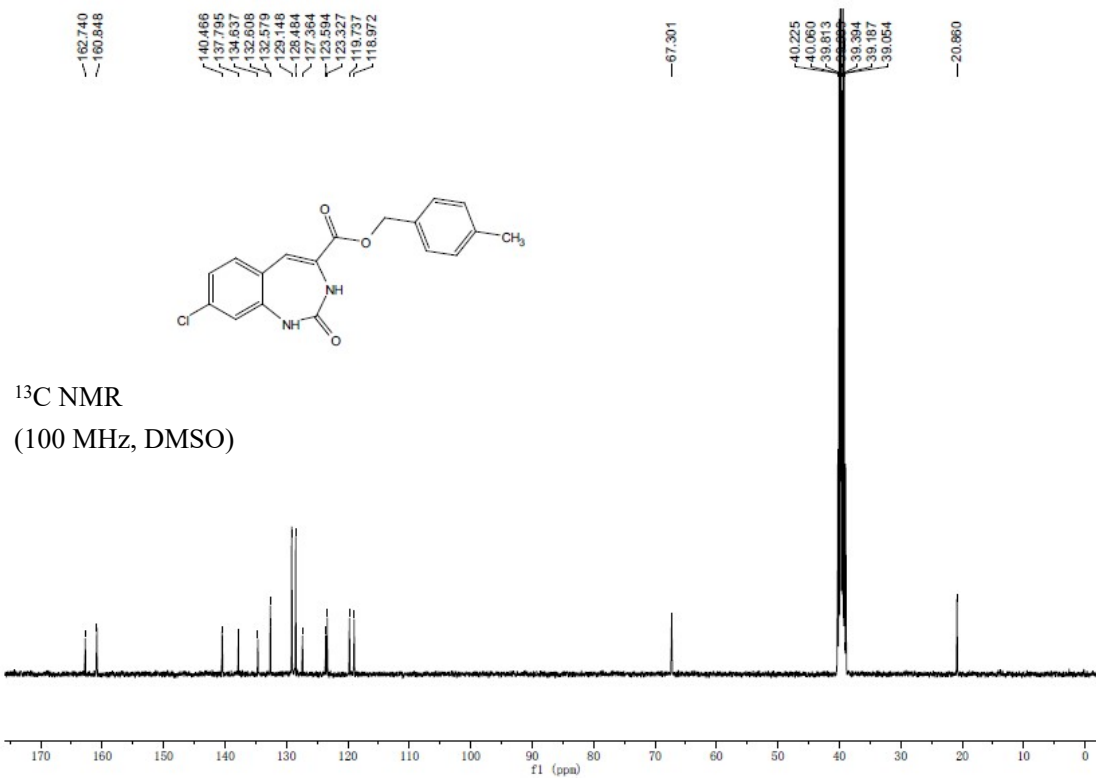

(3v)

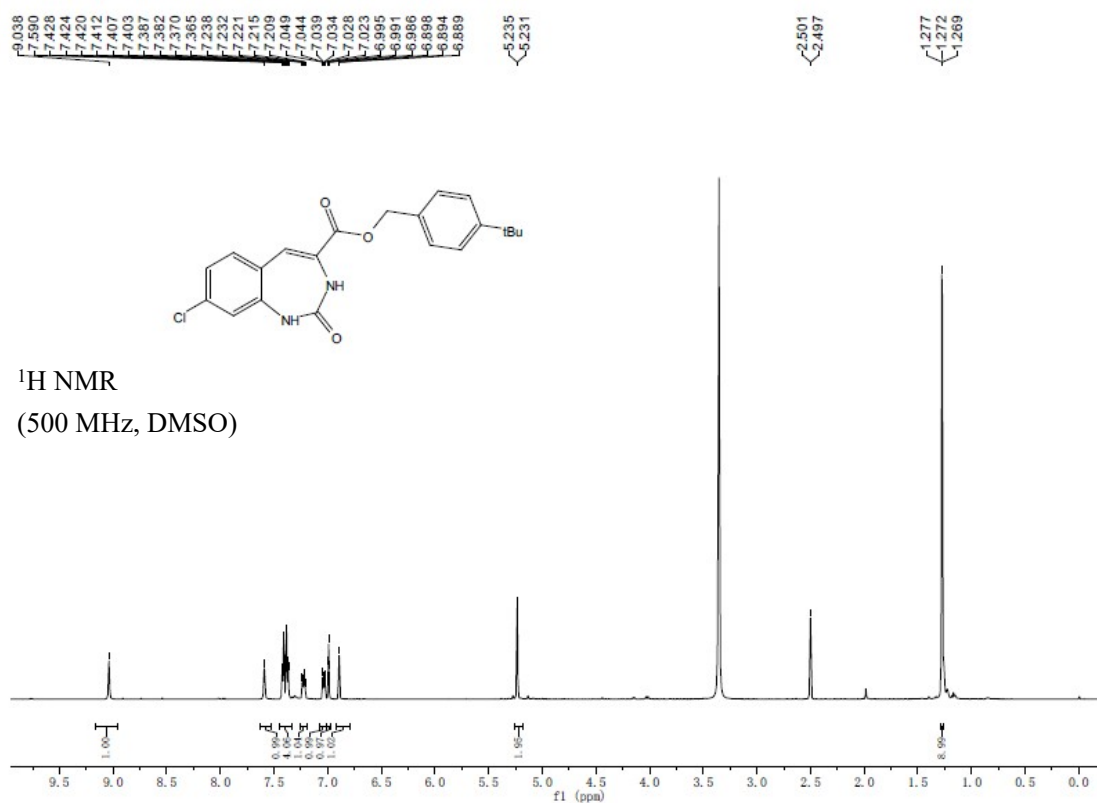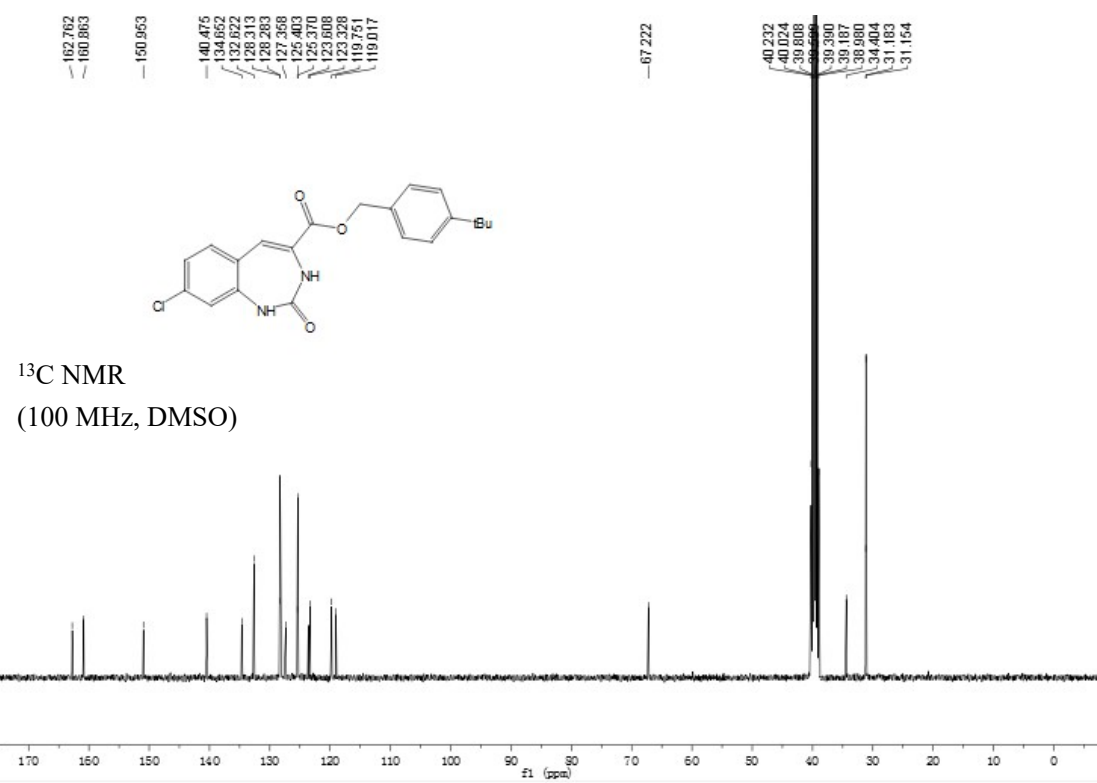

(3w)

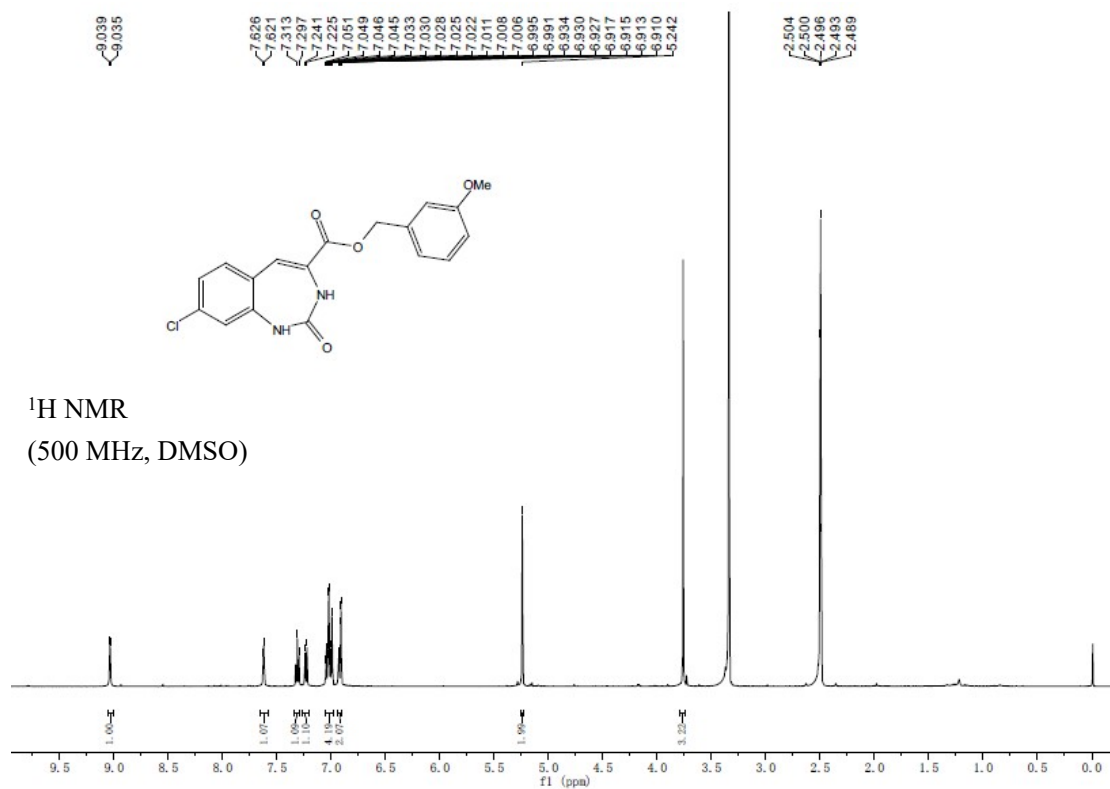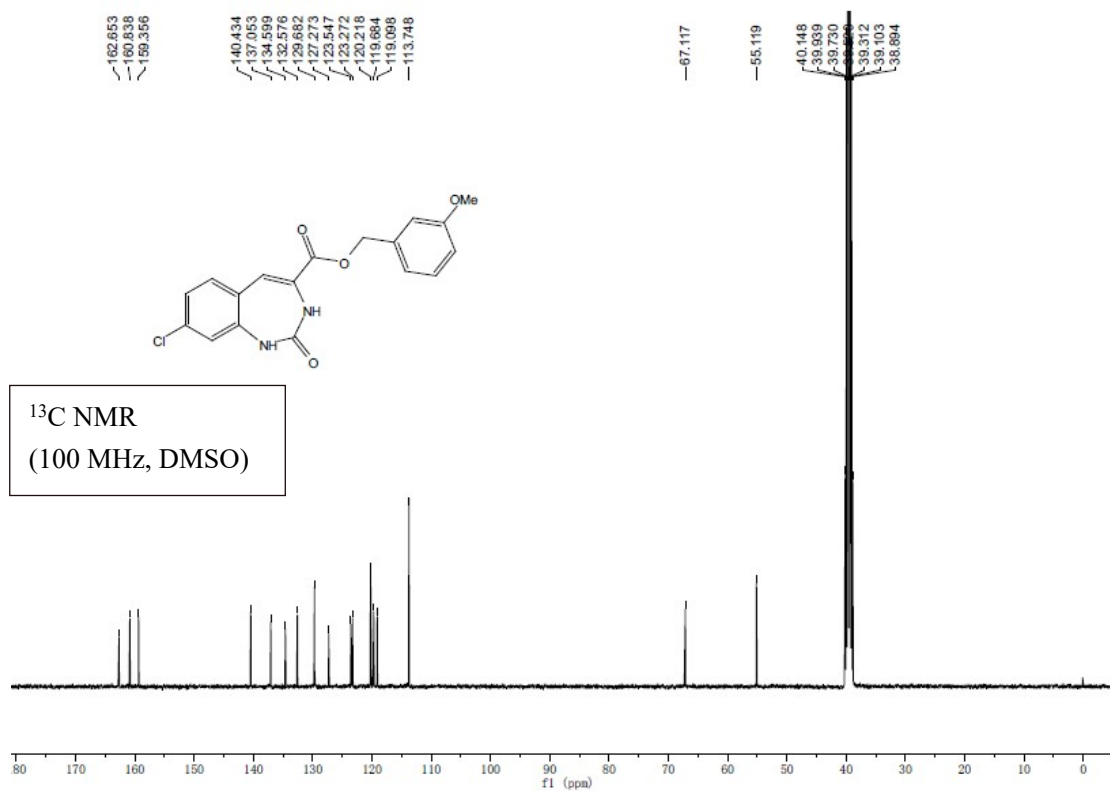

(3x)

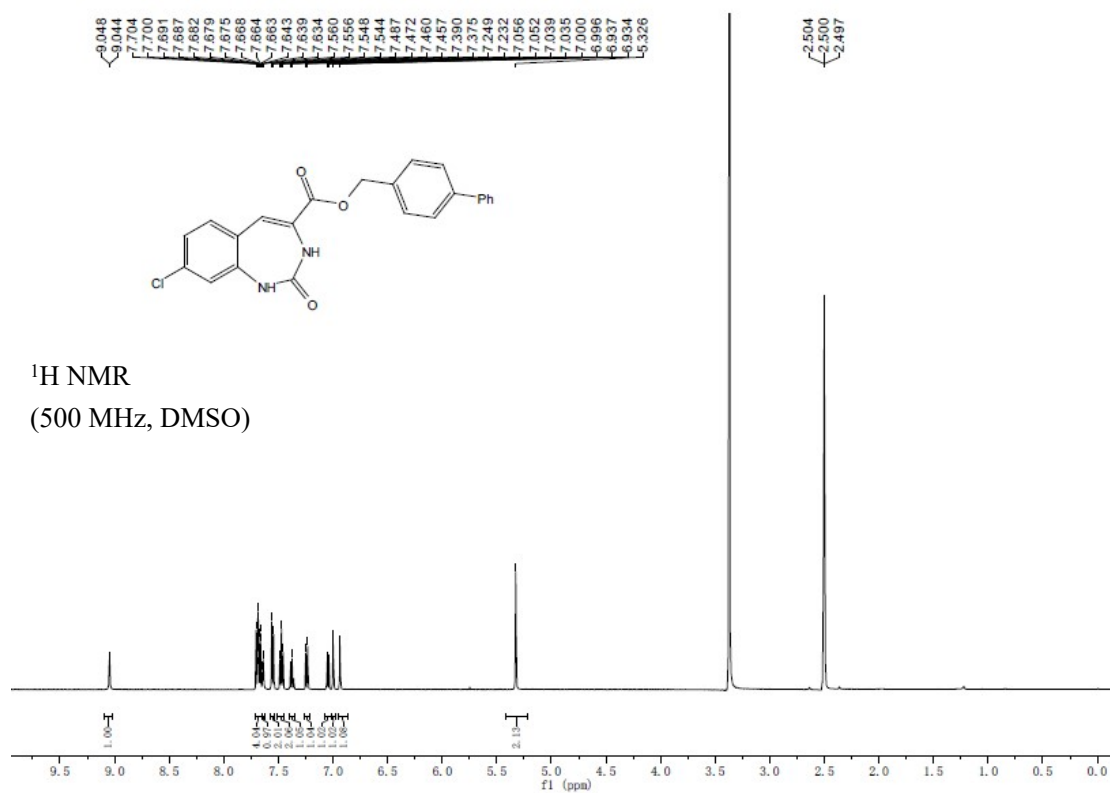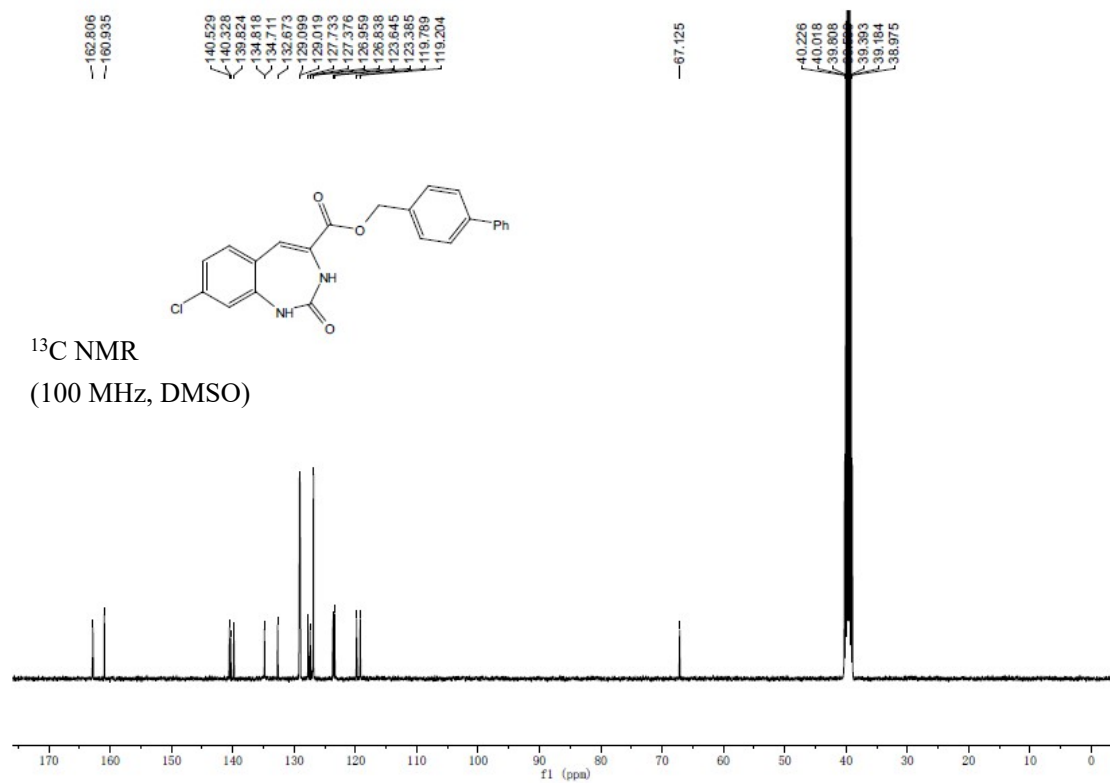

(3y)

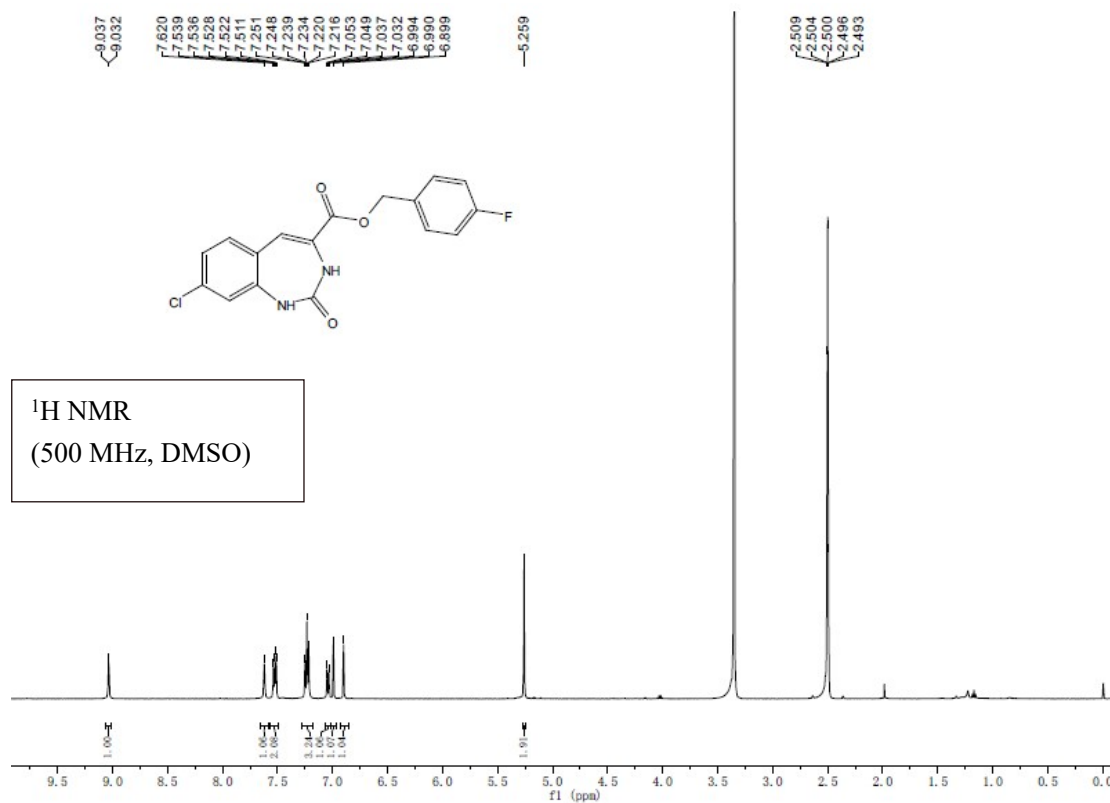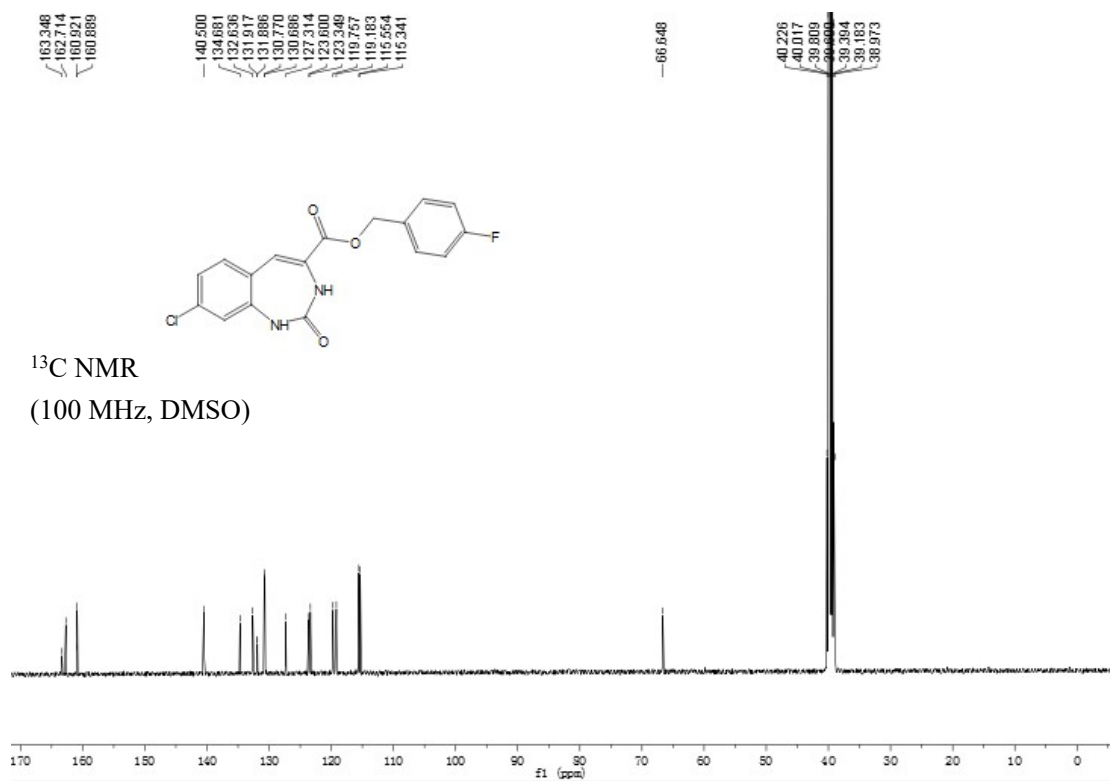

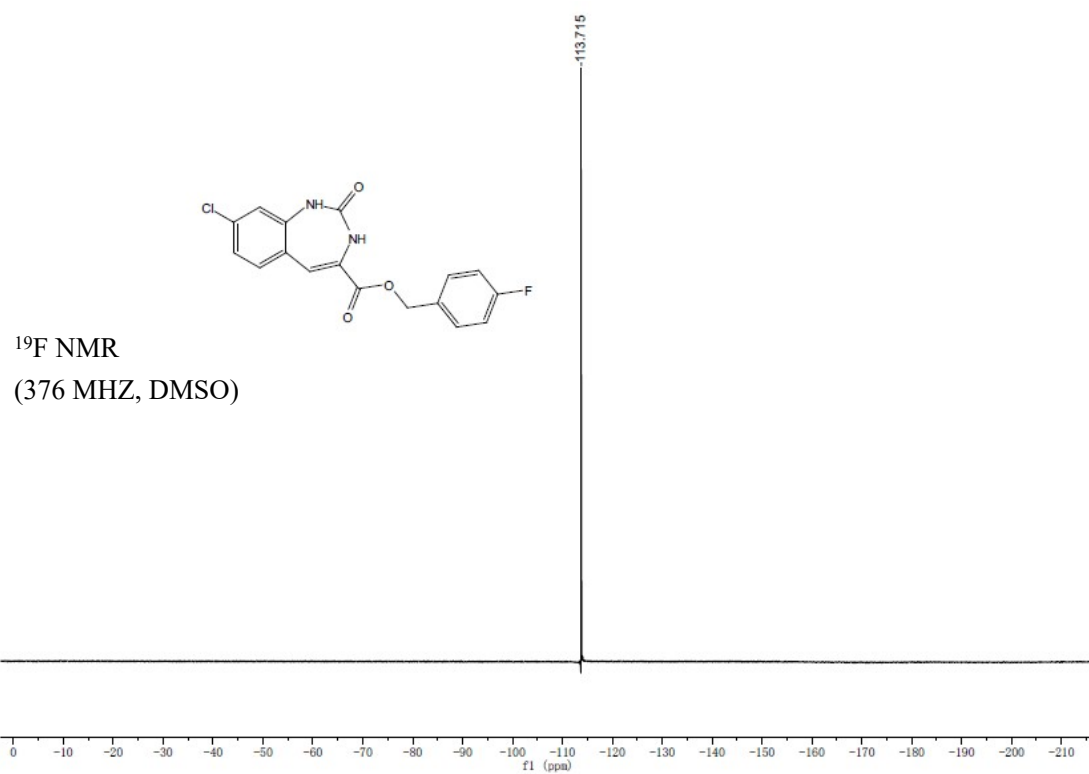

(3z)

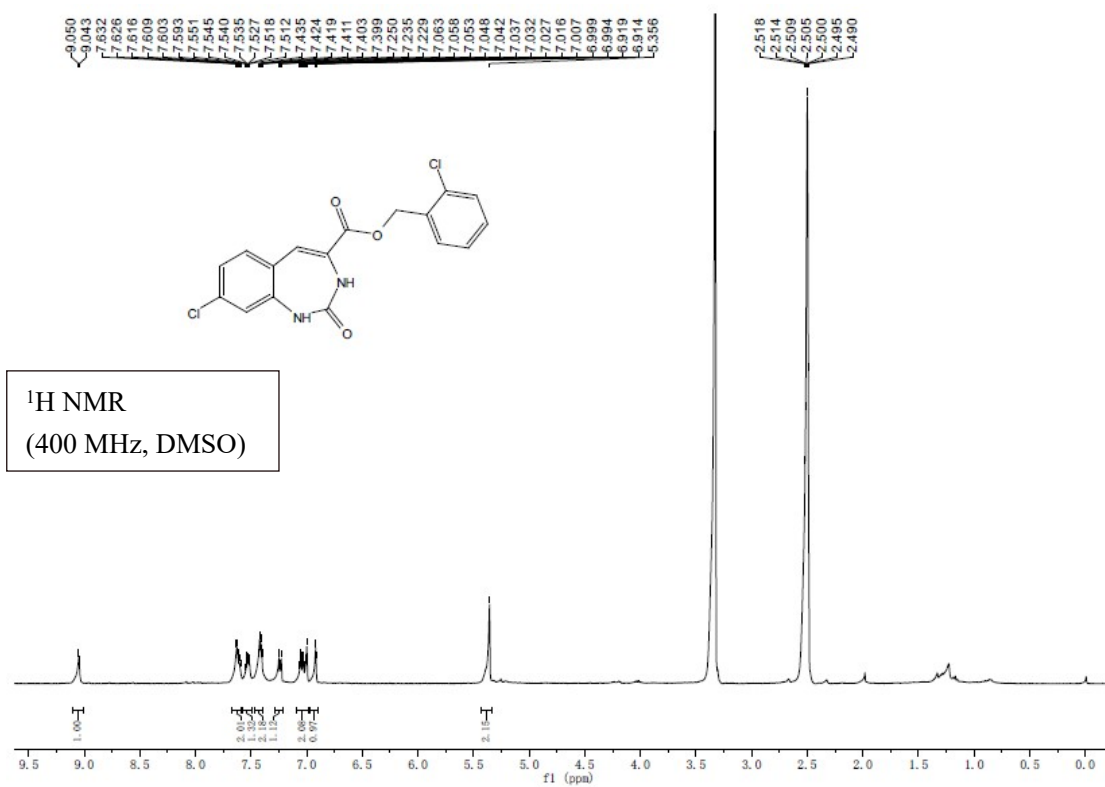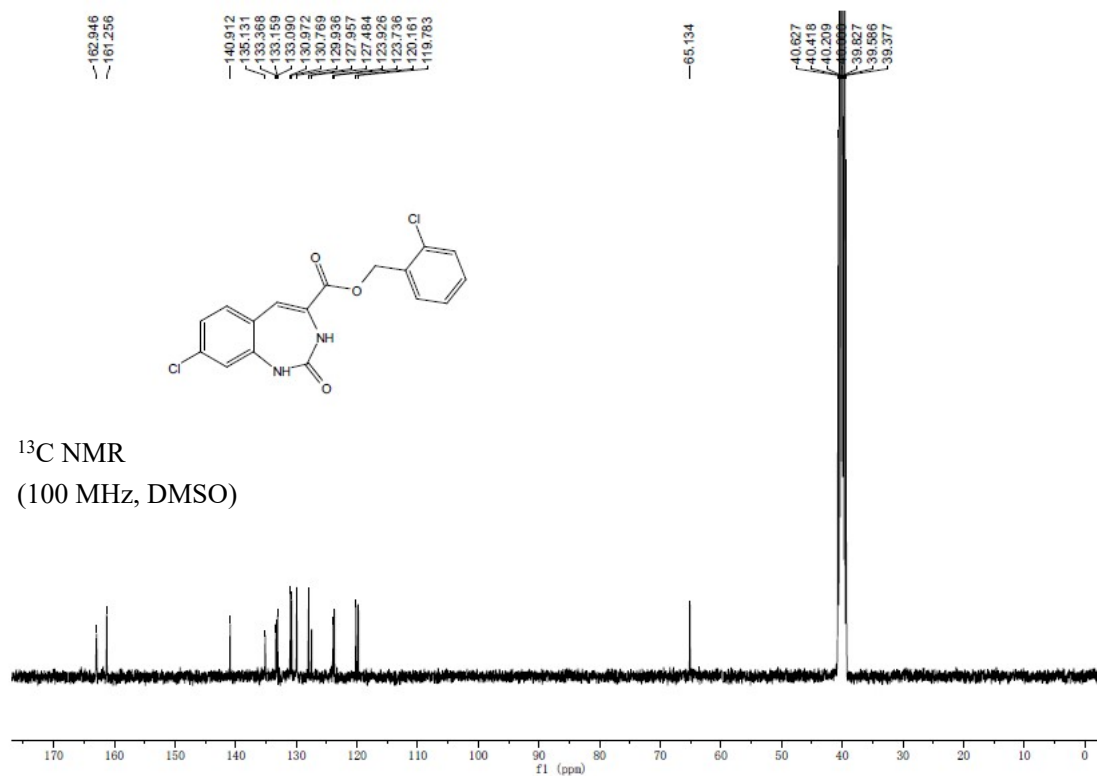



(3aa)

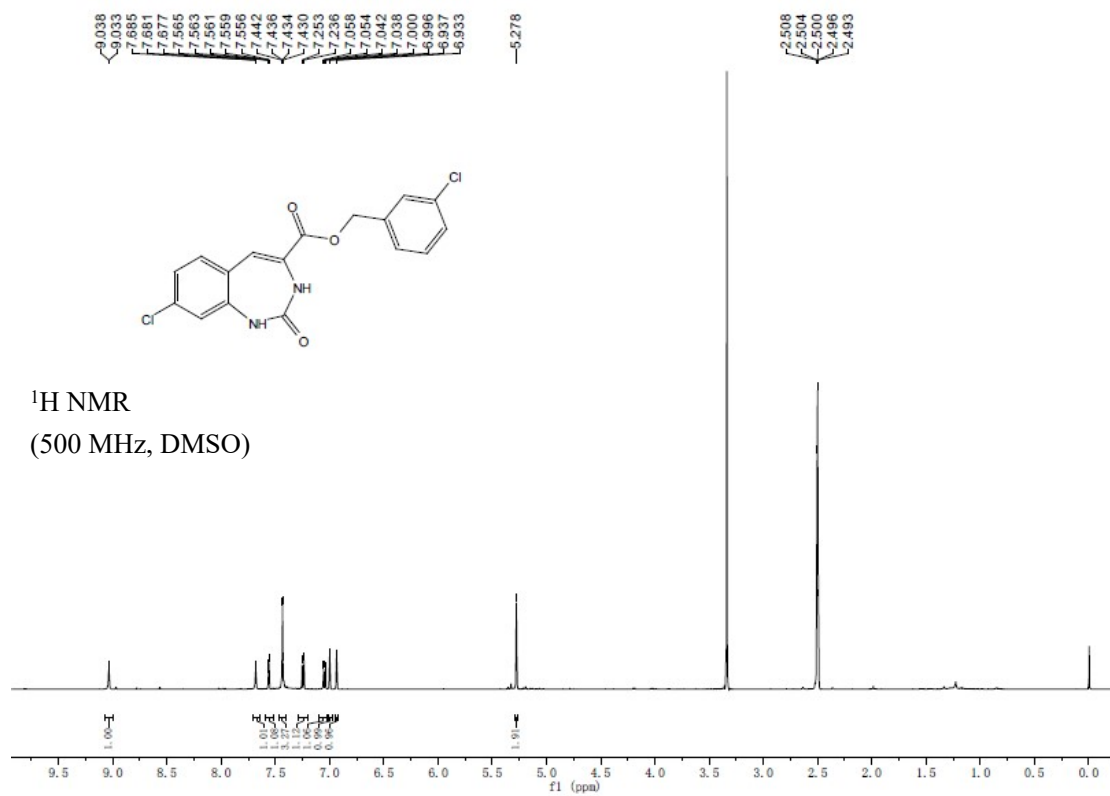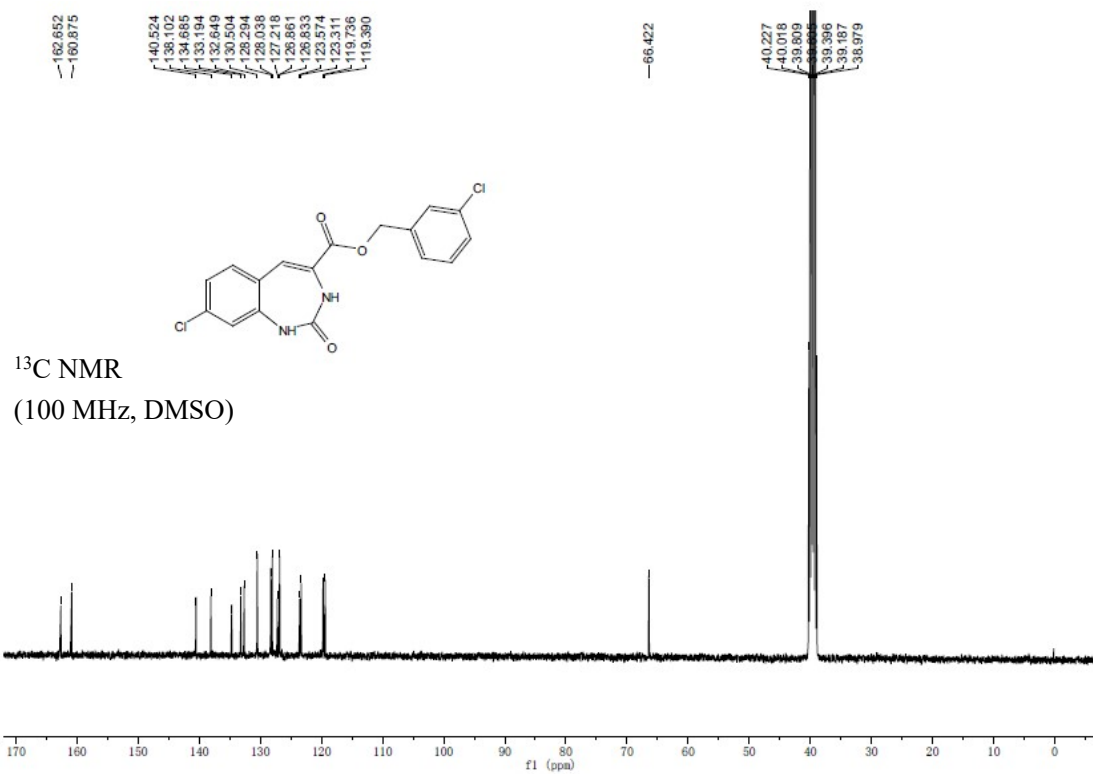

(3ab)

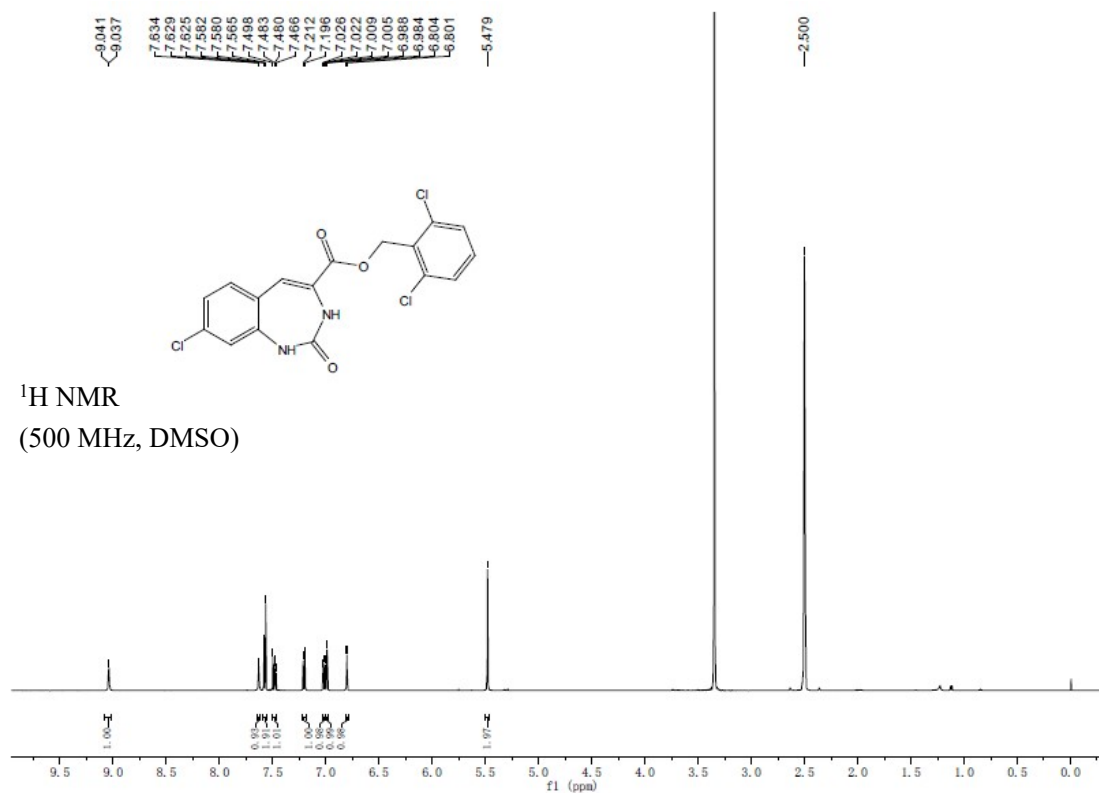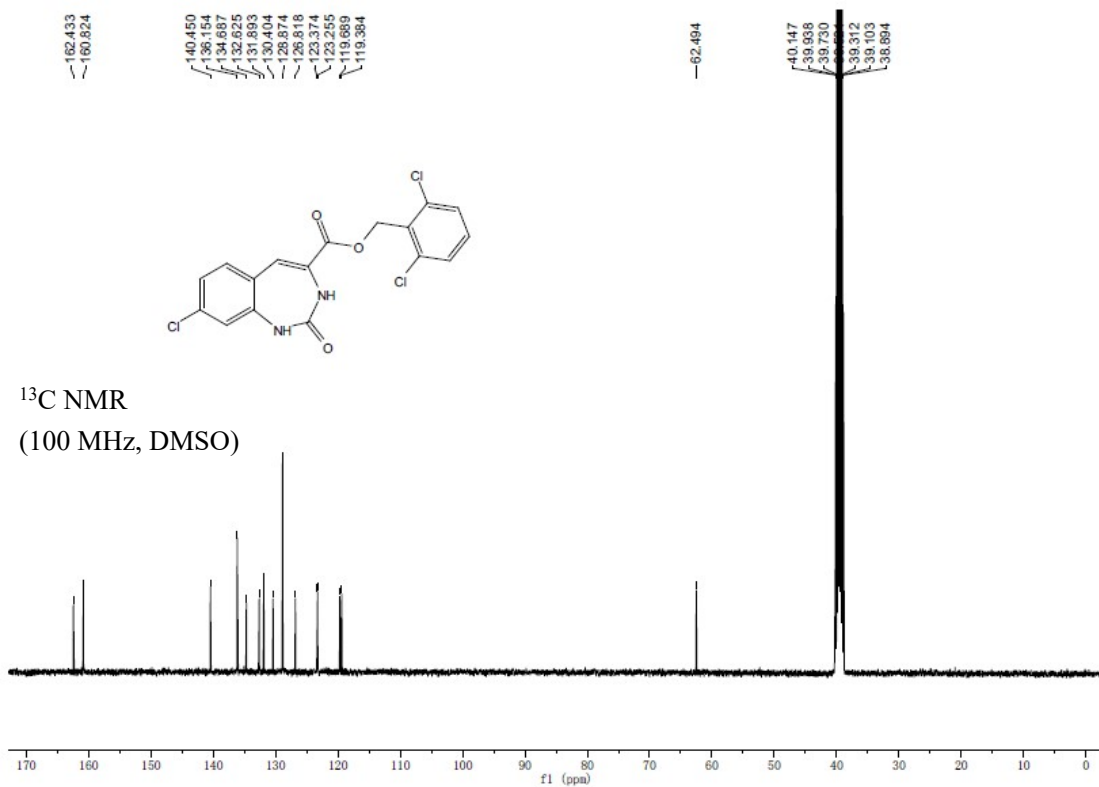

**(3ac)**

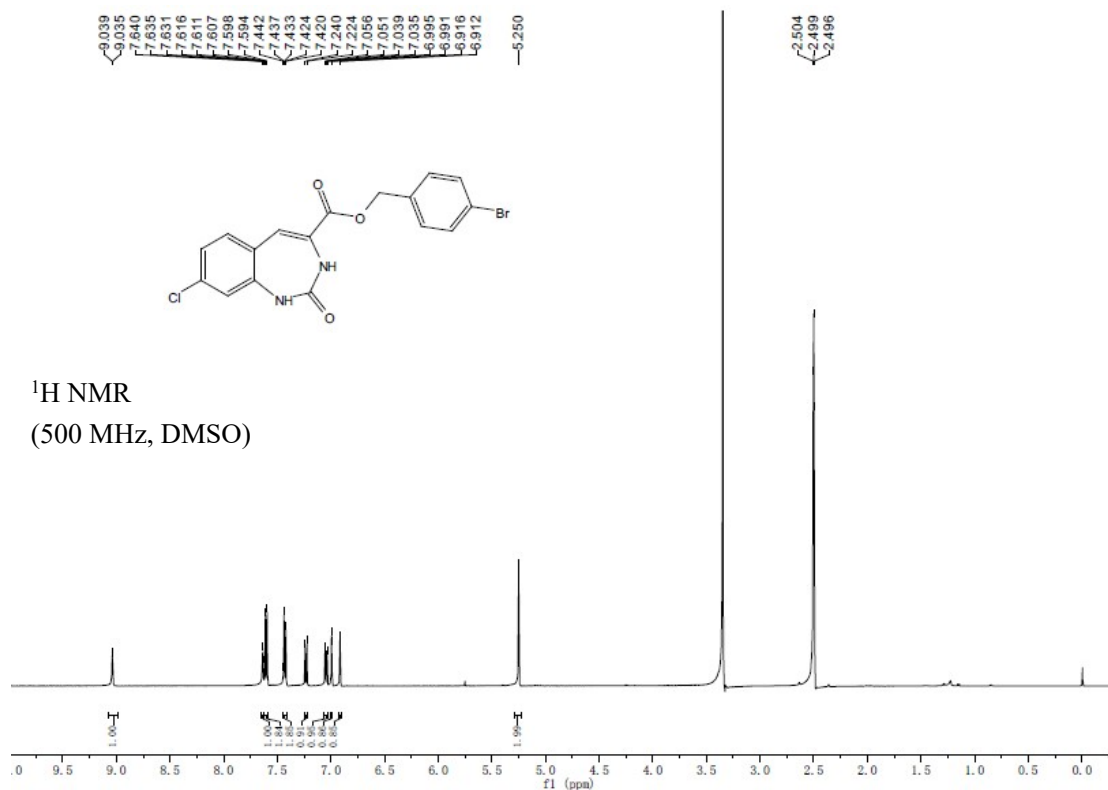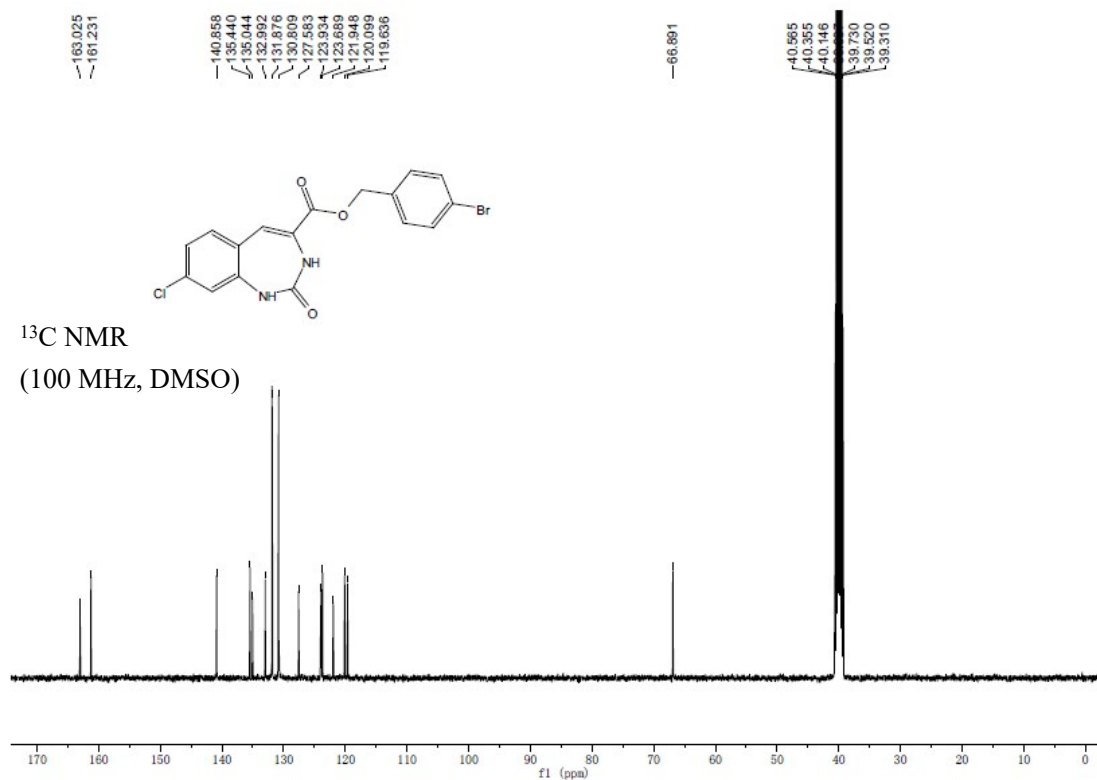

(3ad)

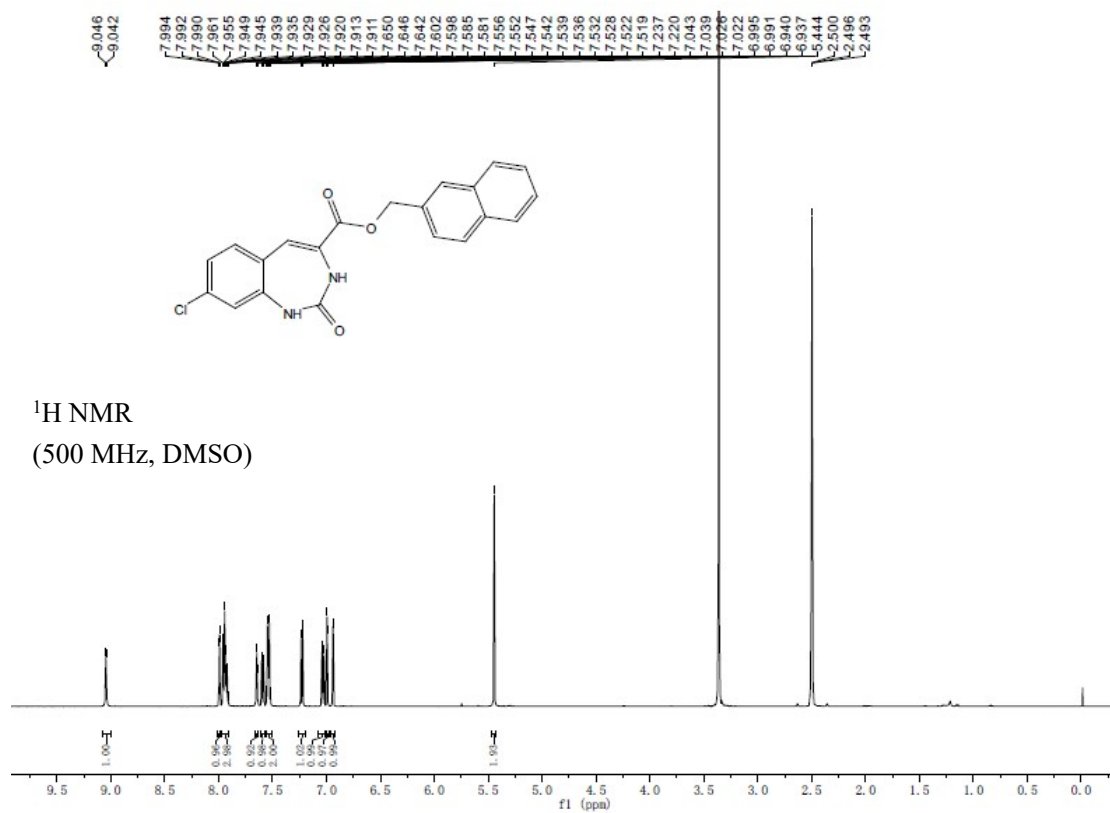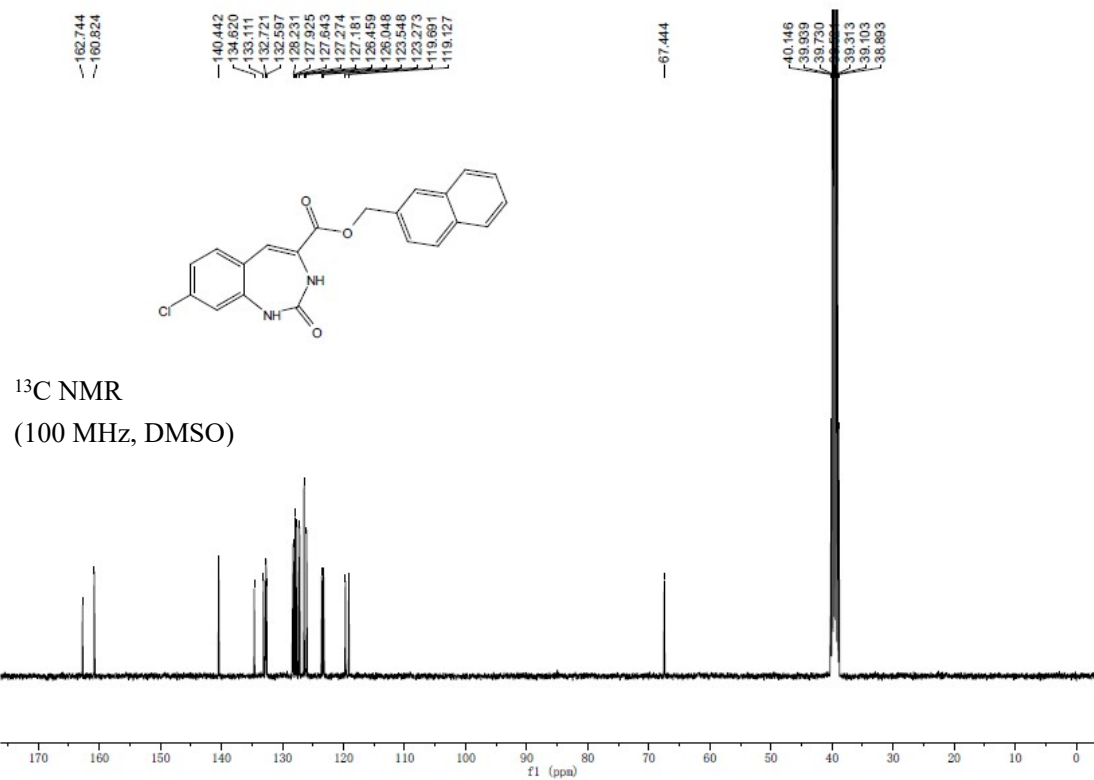

(4)

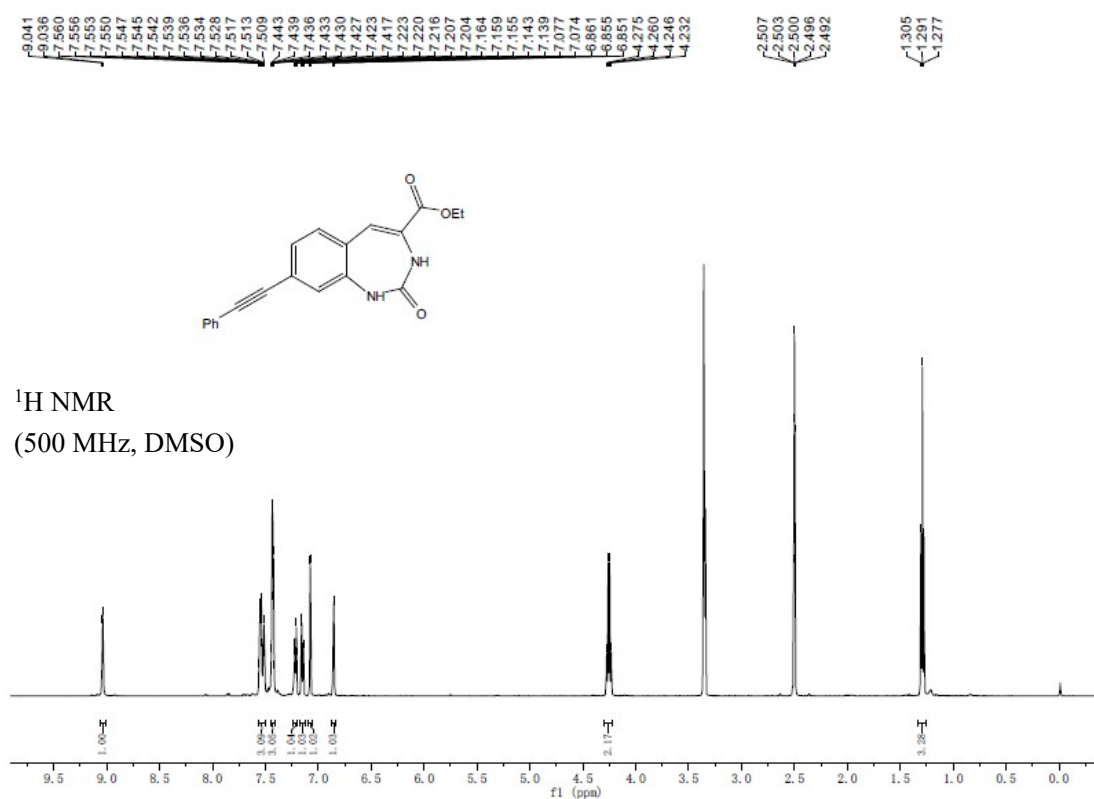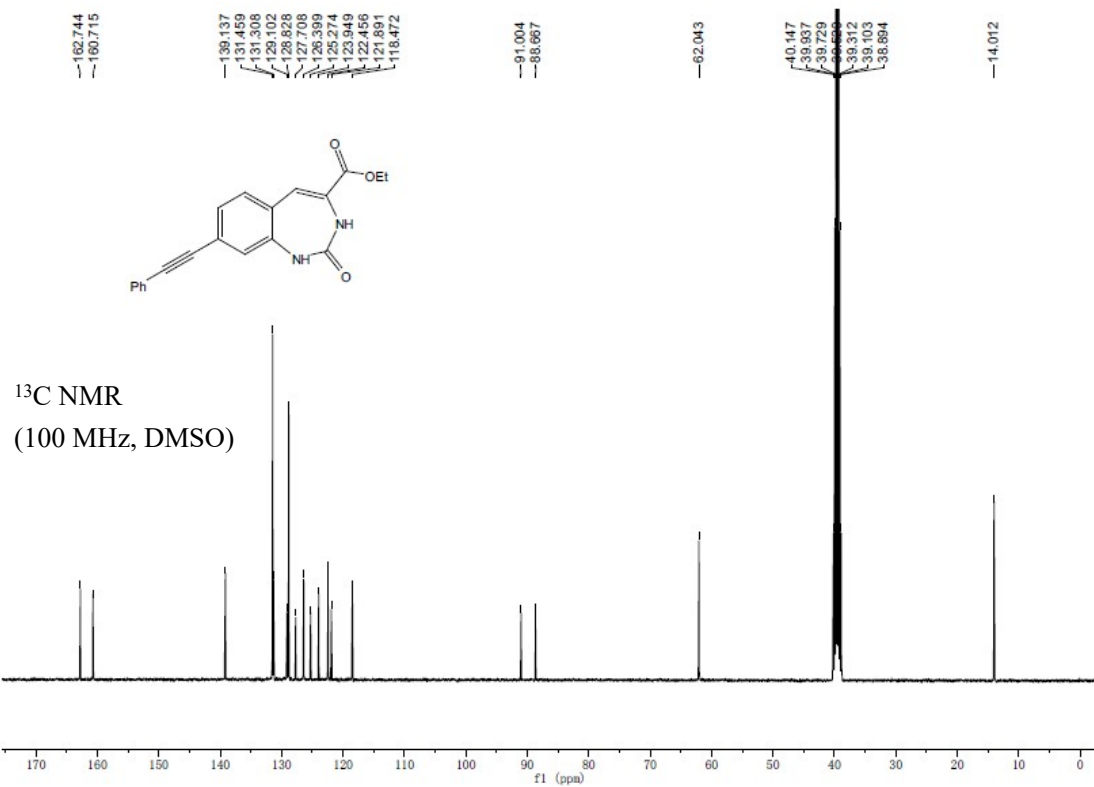

(5)

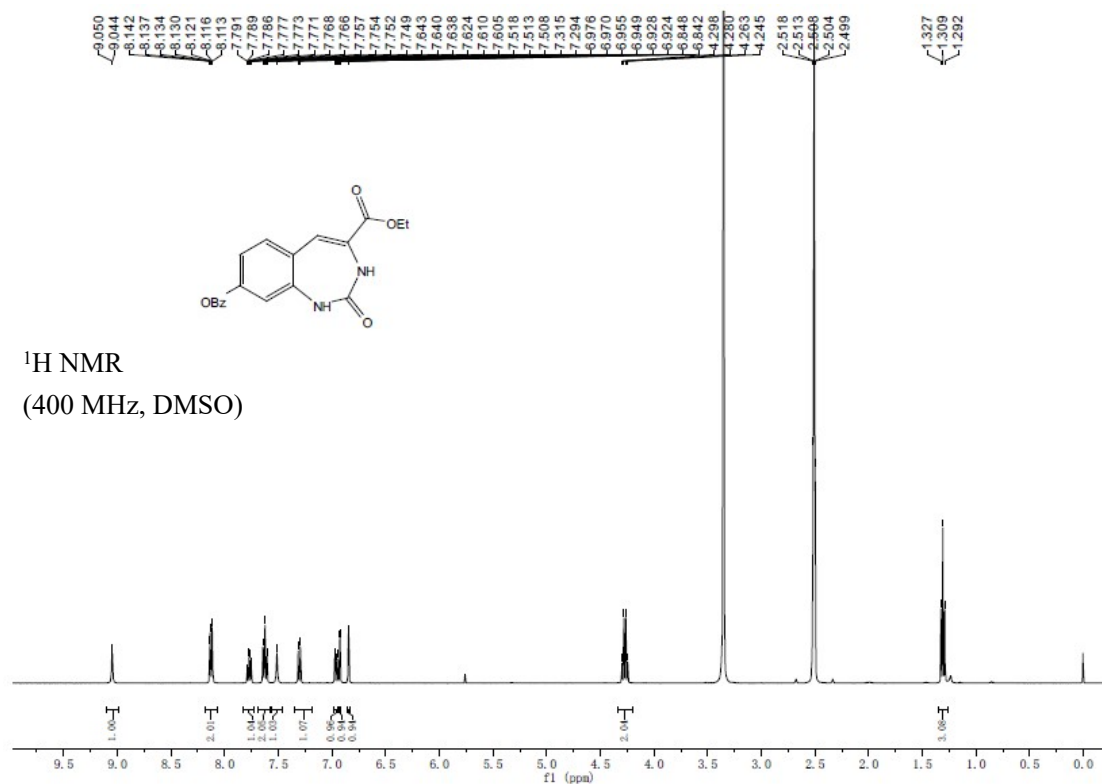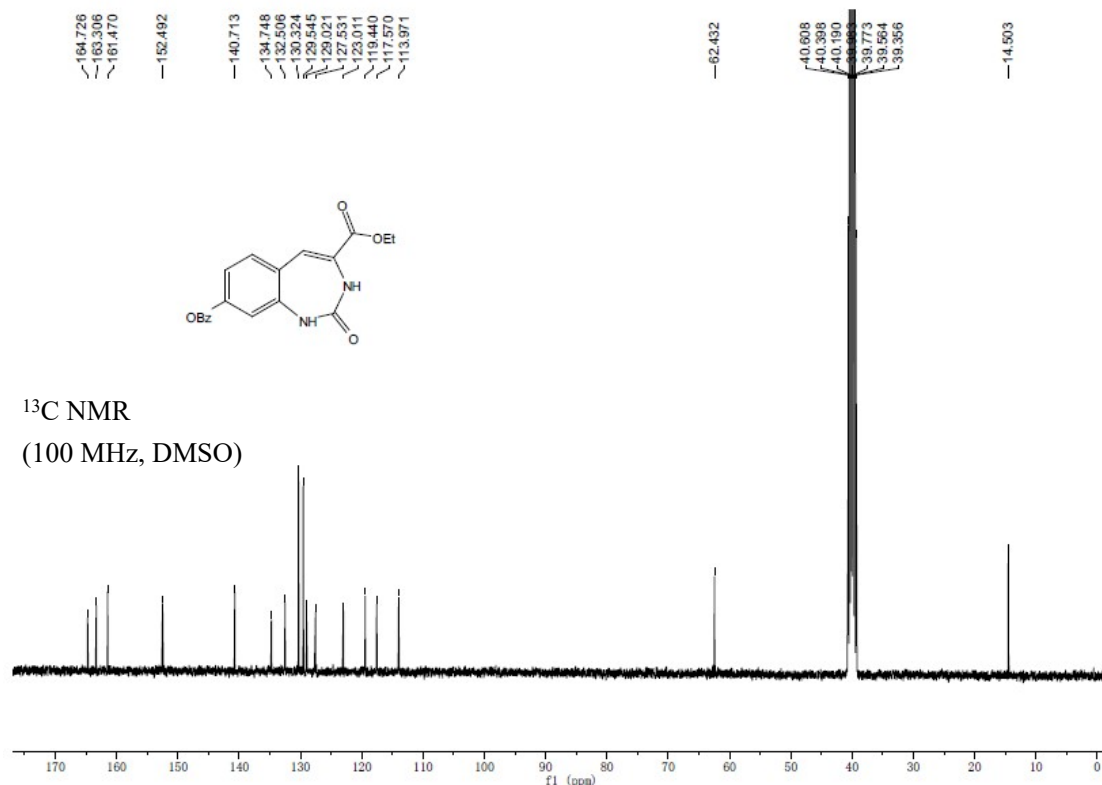

## VII. X-ray Data

### X-ray Data of 3e (CCDC: 2132509)

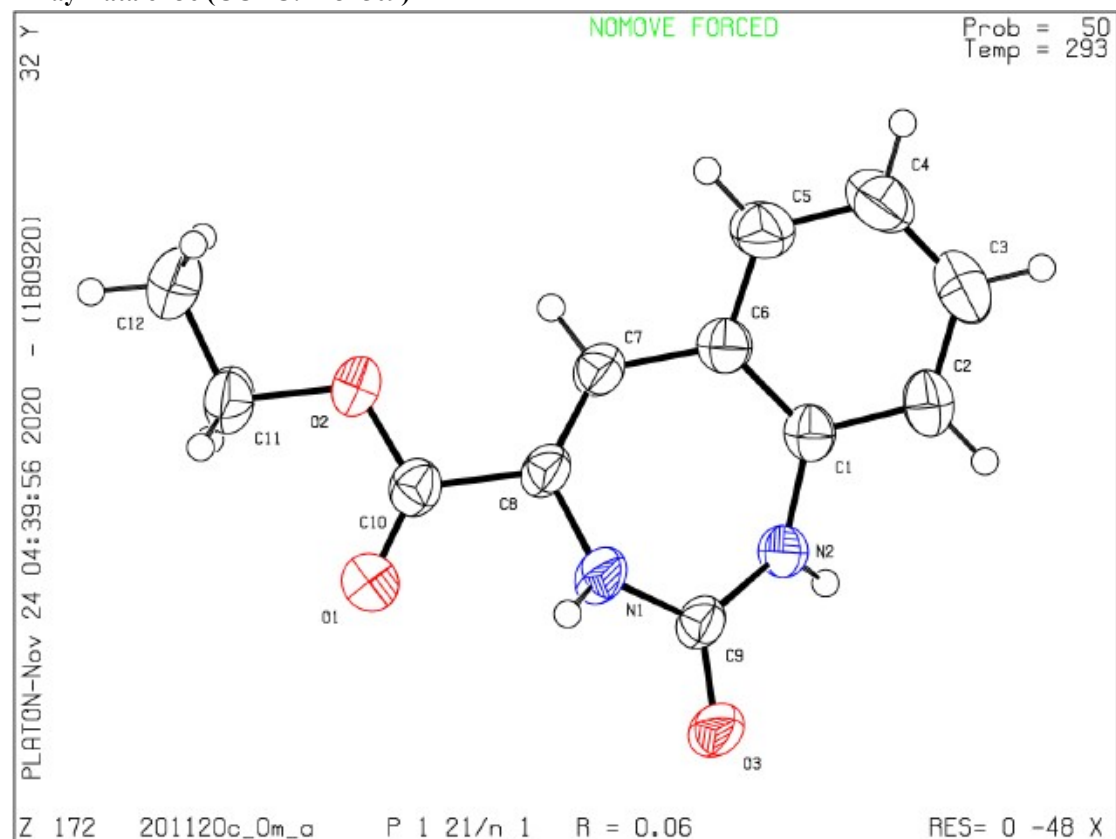

## VIII. References

- [1] H.-M. Jin, B. Tian, X.-L. Song, J. Xie, M. Rudolph, F. Rominger, A. S. K. Hashmi, *Angew. Chem. Int. Ed.*, 2016, **55**, 12688.
- [2] P. Raju, G. G. Rajeshwaran, M. Nandakumar, A. K. Mohanakrishnan, *Eur. J. Org. Chem.*, 2015, **16**, 3513-3523.
- [3] J.-Y. Zhang, Y. Li, C.-F. Zhang, X.-N. Wang, J.-B. Chang, *Org. Lett.*, 2021, **23**, 2029–2035.
- [4] A. S. Golubev, A. F. Shidlovskii, A. S. Peregudov, N. D. Kagramanov, *Russ.Chem.Bull., Int.Ed.*, 2014, **63**, 2264-2270.
- [5] B.-L. Wen, N. Kazunari, S. Ken, N. Yoshiaki, *Angew. Chem. Int. Ed.*, 2019, **58**, 1168-1173.
